# Supplementary material for: Antiretroviral drug class and anaemia risk in the current treatment era among people living with HIV in the USA: a clinical cohort study
Source: PubMed Central journal article supplement — BMJ Open. 2020 Mar 19;10(3):e031487. doi: 10.1136/bmjopen-2019-031487 (PMC7103836; doi:10.1136/bmjopen-2019-031487), 2020-03-19
Supplement: bmjopen-2019-031487.draft_revisions.pdf [file bmjopen-2019-031487.draft_revisions.pdf]

# BMJ Open

BMJ Open is committed to open peer review. As part of this commitment we make the peer review history of every article we publish publicly available.

When an article is published we post the peer reviewers' comments and the authors' responses online. We also post the versions of the paper that were used during peer review. These are the versions that the peer review comments apply to.

The versions of the paper that follow are the versions that were submitted during the peer review process. They are not the versions of record or the final published versions. They should not be cited or distributed as the published version of this manuscript.

BMJ Open is an open access journal and the full, final, typeset and author-corrected version of record of the manuscript is available on our site with no access controls, subscription charges or pay-per-view fees (<http://bmjopen.bmj.com>).

If you have any questions on BMJ Open's open peer review process please email [info.bmjopen@bmj.com](mailto:info.bmjopen@bmj.com)

# BMJ Open

## Class of antiretroviral drugs and anemia risk in the current treatment era

|                               |                                                                                                                                                                                                                                                                                                                                                                                                                                                                                                                                                                                                                                                                                                                                                                                                                                                                                                                                                          |
|-------------------------------|----------------------------------------------------------------------------------------------------------------------------------------------------------------------------------------------------------------------------------------------------------------------------------------------------------------------------------------------------------------------------------------------------------------------------------------------------------------------------------------------------------------------------------------------------------------------------------------------------------------------------------------------------------------------------------------------------------------------------------------------------------------------------------------------------------------------------------------------------------------------------------------------------------------------------------------------------------|
| Journal:                      | <i>BMJ Open</i>                                                                                                                                                                                                                                                                                                                                                                                                                                                                                                                                                                                                                                                                                                                                                                                                                                                                                                                                          |
| Manuscript ID                 | bmjopen-2019-031487                                                                                                                                                                                                                                                                                                                                                                                                                                                                                                                                                                                                                                                                                                                                                                                                                                                                                                                                      |
| Article Type:                 | Research                                                                                                                                                                                                                                                                                                                                                                                                                                                                                                                                                                                                                                                                                                                                                                                                                                                                                                                                                 |
| Date Submitted by the Author: | 08-May-2019                                                                                                                                                                                                                                                                                                                                                                                                                                                                                                                                                                                                                                                                                                                                                                                                                                                                                                                                              |
| Complete List of Authors:     | Harding, Barbara; University of Washington, Epidemiology<br>Whitney, Bridget; University of Washington, Epidemiology<br>Nance, Robin; University of Washington, Epidemiology<br>Crane, HM; University of Washington, Medicine<br>Burkholder, Greer; University of Alabama at Birmingham<br>Moore, Richard; Johns Hopkins University School of Medicine, Medicine<br>Mathews, William; University of California, San Diego<br>Eron, Joseph; University of North Carolina at Chapel Hill<br>Hunt, Peter; University of California San Francisco<br>Volberding, Paul ; UCSF, Medicine<br>Rodriguez, Benigno ; Case Western Reserve University<br>Mayer, Kenneth; The Fenway Institute at Fenway Health<br>Saag, Michael ; University of Alabama at Birmingham<br>Kitahata, Mari M. ; University of Washington, Medicine<br>Heckbert, Susan; University of Washington, Epidemiology<br>Delaney, Joseph; University of Washington, Department of Epidemiology |
| Keywords:                     | anemia, HIV & AIDS < INFECTIOUS DISEASES, integrase inhibitors, antiretroviral therapy, cohort                                                                                                                                                                                                                                                                                                                                                                                                                                                                                                                                                                                                                                                                                                                                                                                                                                                           |
|                               |                                                                                                                                                                                                                                                                                                                                                                                                                                                                                                                                                                                                                                                                                                                                                                                                                                                                                                                                                          |

SCHOLARONE™  
Manuscripts

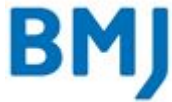

I, the Submitting Author has the right to grant and does grant on behalf of all authors of the Work (as defined in the below author licence), an exclusive licence and/or a non-exclusive licence for contributions from authors who are: i) UK Crown employees; ii) where BMJ has agreed a CC-BY licence shall apply, and/or iii) in accordance with the terms applicable for US Federal Government officers or employees acting as part of their official duties; on a worldwide, perpetual, irrevocable, royalty-free basis to BMJ Publishing Group Ltd ("BMJ") its licensees and where the relevant Journal is co-owned by BMJ to the co-owners of the Journal, to publish the Work in this journal and any other BMJ products and to exploit all rights, as set out in our [licence](#).

The Submitting Author accepts and understands that any supply made under these terms is made by BMJ to the Submitting Author unless you are acting as an employee on behalf of your employer or a postgraduate student of an affiliated institution which is paying any applicable article publishing charge ("APC") for Open Access articles. Where the Submitting Author wishes to make the Work available on an Open Access basis (and intends to pay the relevant APC), the terms of reuse of such Open Access shall be governed by a Creative Commons licence – details of these licences and which [Creative Commons](#) licence will apply to this Work are set out in our licence referred to above.

Other than as permitted in any relevant BMJ Author's Self Archiving Policies, I confirm this Work has not been accepted for publication elsewhere, is not being considered for publication elsewhere and does not duplicate material already published. I confirm all authors consent to publication of this Work and authorise the granting of this licence.

## Class of antiretroviral drugs and anemia risk in the current treatment era

**Authors:** B.N. Harding<sup>1</sup>, B.M. Whitney<sup>1</sup>, R.M. Nance<sup>1</sup>, H.M. Crane<sup>1</sup>, G. Burkholder<sup>2</sup>, R.D. Moore<sup>3</sup>, W.C. Mathews<sup>4</sup>, J.J. Eron<sup>5</sup>, P. W. Hunt<sup>6</sup>, P. Volberding<sup>6</sup>, B. Rodriguez<sup>7</sup>, K.H. Mayer<sup>8</sup>, M.S. Saag<sup>2</sup>, M.M. Kitahata<sup>1</sup>, S.R. Heckbert<sup>1</sup>, J.A.C. Delaney<sup>1</sup>

### **Affiliations:**

<sup>1</sup>University of Washington;

<sup>2</sup>University of Alabama Birmingham;

<sup>3</sup>Johns Hopkins University;

<sup>4</sup>University of California San Diego;

<sup>5</sup>University of North Carolina, Chapel Hill;

<sup>6</sup>University of California San Francisco;

<sup>7</sup>Case Western Reserve University;

<sup>8</sup>Fenway Health Institute

**Corresponding author:** Barbara N Harding, University of Washington, Department of Epidemiology, 1959 NE Pacific Street, Health Sciences Building F-26, Box 357236, Seattle, WA, 98195. E-mail: hardingb@uw.edu

**Keywords:** antiretroviral agents, cohort, anemia, integrase inhibitors, protease inhibitors, non-nucleoside reverse transcriptase inhibitors

### **Copyright:**

The Corresponding Author has the right to grant on behalf of all authors and does grant on behalf of all authors, an exclusive license (or non exclusive for government employees) on a worldwide basis to the BMJ Publishing Group Ltd to permit this article (if accepted) to be published in BMJ editions and any other BMJ PGL products and sublicenses such use and exploit all subsidiary rights, as set out in our license.

### **Competing interest statement:**

Ms. Harding reports grants from NHLBI during the conduct of the study; Ms. Whitney reports grants from NIH during the conduct of the study; Ms. Nance reports grants from NIH during the conduct of the study; Dr. Crane reports grants from NHLBI during the conduct of the study, grants from NIH, grants from ViiV and grants from PCORI outside the submitted work; Dr. Burkholder reports grants from NIH during the conduct of the study, other from Amgen, Inc outside the submitted work; Dr. Moore reports grants from NHLBI during the conduct of the study; Dr. Mathews reports grants from NHLBI during the conduct of the study; Dr. Eron reports grants from National Institutes of Health, during the conduct of the study, grants and personal fees from Gilead Sciences, grants and personal fees from ViiV Healthcare, grants and personal

1  
2  
3 fees from Janssen and personal fees from Merck outside the submitted work; Dr. Hunt reports  
4 grants from NHLBI during the conduct of the study, personal fees from Gilead, personal fees  
5 from Viiv, personal fees from Janssen and non-financial support from Merck outside the  
6 submitted work; Dr. Volberding reports grants from NHLBI during the conduct of the study,  
7 other from Merck outside the submitted work; Dr. Rodriguez reports grants from NIH during the  
8 conduct of the study, personal fees from Gilead and personal fees from ViiV outside the  
9 submitted work; Dr. Mayer reports grants from NHLBI during the conduct of the study; Dr. Saag  
10 reports grants from NIAID / NIH during the conduct of the study, grants from Gilead, Merck,  
11 and ViiV Healthcare outside the submitted work; Dr. Kitahata reports grants from NHLBI during  
12 the conduct of the study; Dr. Heckbert reports grants from National Institutes of Health during  
13 the conduct of the study; Dr. Delaney reports grants from NHLBI during the conduct of the  
14 study.  
15  
16  
17

### 18 **Contributions:**

19  
20 Ms. Harding, has conducted all analyses, contributed to methodologic approach, and  
21 written the manuscript. In addition, Ms. Whitney and Ms. Nance contributed to data  
22 preparation and analysis, Dr. Delaney contributed to the analysis, Drs. Heckbert, Crane and  
23 Delaney contributed to conception and design of the work and all authors contributed to the  
24 interpretation of data and critically revising the manuscript for important intellectual content.  
25  
26

### 27 **Transparency declaration:**

28 Ms. Harding affirms that the manuscript is an honest, accurate, and transparent account of the  
29 study being reported; that no important aspects of the study have been omitted; and that any  
30 discrepancies from the study as planned (and, if relevant, registered) have been explained.  
31  
32

### 33 **Ethical approval:**

34 Informed consent was obtained from all participants and institutional review boards at each site  
35 approved CNICS protocols.  
36  
37

### 38 **Funding:**

39 This project was funded by R01HL126538-01A1/National Heart, Lung and Blood Institute. They  
40 provided an unrestricted grant and we are completely independent from the study sponsors.  
41  
42

43 **Data sharing:** No additional data available.  
44  
45

46 **Dissemination declaration:** Dissemination of the study findings are not applicable to  
47 participants or patient organizations.  
48  
49  
50  
51  
52  
53  
54  
55  
56  
57  
58  
59  
60

1  
2  
3  
4  
5  
6  
7  
8  
9  
10  
11 **Abstract:** (276 words)  
12

13  
14 **OBJECTIVES:** Anemia is common among people living with HIV (PLWH) and has been  
15 associated with certain, often older, antiretroviral medications. Information on current  
16 antiretroviral therapy (ART) and anemia is limited. The objectives were to compare  
17 associations between anemia incidence or hemoglobin change with core ART classes in  
18 the current ART era.  
19  
20  
21  
22  
23  
24  
25

26  
27 **DESIGN:** Retrospective cohort study.  
28

29  
30 **SETTING:** U.S.-based prospective clinical cohort of PLWH aged 18 and above receiving  
31 care at 8 sites between 1/2010-3/2018.  
32  
33  
34

35  
36 **PARTICIPANTS:** 16,505 PLWH were included in this study.  
37

38  
39 **MAIN OUTCOME MEASURES:** Anemia risk and hemoglobin change were measured  
40 for person-time on a protease inhibitor (PI) or an integrase strand transfer inhibitor  
41 (INSTI), relative to a non-nucleoside reverse transcriptase inhibitor (NNRTI) reference.  
42  
43  
44

45  
46 We also examined PLWH on multiple core classes. Cox proportional hazards regression  
47 analyses were conducted to measure associations between time-updated ART classes  
48 and incident anemia or severe anemia. Linear mixed effects models were used to  
49 examine relationships between ART classes and hemoglobin change.  
50  
51  
52  
53  
54  
55  
56  
57  
58  
59  
60

1  
2  
3 RESULTS: During a median of 4.9 years of follow-up, 1,040 developed anemia and 488  
4  
5 developed severe anemia during. Compared to NNRTI use, INSTI-based regimens were  
6  
7 associated with an increased risk of anemia (adjusted hazard ratio [aHR] 1.17, 95%  
8  
9 confidence interval [CI] 0.94-1.47) and severe anemia (aHR1.55 95%CI 1.11-2.17), and a  
10  
11 decrease in hemoglobin level. Time on multiple core classes was also associated with  
12  
13 increased anemia risk (aHR 1.30, 95%CI 1.06-1.60) and severe anemia risk (aHR 1.35,  
14  
15 95%CI 0.99-1.85), while no associations were found for PI use.  
16  
17  
18  
19  
20  
21

22 CONCLUSION: These findings suggest INSTI use may increase the risk of anemia. If  
23  
24 confirmed, screening for anemia development in users of INSTIs may be beneficial.  
25  
26

27 Further research into underlying mechanisms is warranted.  
28  
29  
30  
31  
32  
33  
34  
35  
36  
37  
38  
39  
40  
41  
42  
43  
44  
45  
46  
47  
48  
49  
50  
51  
52  
53  
54  
55  
56  
57  
58  
59  
60

1  
2  
3  
4  
5  
6  
7  
8  
9  
10  
11  
12  
13  
14  
15  
16  
17  
18  
19  
20  
21  
22  
23  
24  
25  
26  
27  
28  
29  
30  
31  
32  
33  
34  
35  
36  
37  
38  
39  
40  
41  
42  
43  
44  
45  
46  
47  
48  
49  
50  
51  
52  
53  
54  
55  
56  
57  
58  
59  
60

**Strengths and limitations of this study:**

- This study utilized a large and geographically diverse population of PLWH in care across the U.S.
- This study leveraged comprehensive clinical data, including information on diagnoses, medication use, laboratory test results, demographic information, and medical history.
- This study investigated associations between specific types of ART core regimens and anemia risk.
- This observational study is subject to residual confounding.
- This study focused on anemia assessed from hemoglobin lab values taken at regular medical care visits without excluding participants with conditions strongly associated with hemoglobin level through non-traditional HIV mechanisms.



### Introduction:

Anemia (hemoglobin [Hb]<10 g/dL) and severe anemia (Hb<7.5 g/dL) [1] are common among people living with HIV (PLWH) [2]. The prevalence of anemia is elevated in PLWH compared to the general population. One study reported that among non-pregnant American women living with HIV, the prevalence of anemia was 28.1% compared to 15.1% among women without HIV [3]. Estimates vary by age, sex, HIV disease stage, use of antiretroviral therapy (ART) and injection drug use status [2, 4]. Among PLWH, associations have been found between anemia and mortality [5-10] health-related quality-of- life [2], morbidity, dementia [11], and treatment failure [12]. In

1  
2  
3 addition, anemia is an independent prognostic indicator associated with HIV disease  
4  
5  
6 progression [2, 13, 14], including development of AIDS [8].  
7

8  
9         Research shows that ART impacts anemia risk among PLWH. In the early  
10  
11 treatment era, use of zidovudine (AZT) was a cause of bone marrow suppression  
12  
13 leading to anemia [15]. However, in recent years, AZT use has decreased substantially  
14  
15 as other, better tolerated ART medications have become available. Despite the impact of  
16  
17 specific agents such as AZT, ART use in general is associated with reduced anemia  
18  
19 incidence [16, 17] likely due to inhibition of HIV disease progression. Since worsening  
20  
21 HIV disease parameters are associated with anemia, better disease control with ART  
22  
23 reduces the risk of anemia [18]. Current ART regimens typically include a pair of  
24  
25 nucleoside reverse transcriptase inhibitors (NRTIs) as a backbone plus a core agent.  
26  
27 Common core classes include non-nucleoside reverse-transcriptase inhibitors (NNRTIs),  
28  
29 integrase strand transfer inhibitor (INSTIs), and protease inhibitors (PIs). While ART  
30  
31 use overall reduces anemia, little is known about whether anemia risk differs between  
32  
33 commonly used ART classes in the current treatment era, particularly the newer INSTI  
34  
35 class. Some studies found a possible increased rate of anemia among PI users [19], and  
36  
37 in a randomized controlled trial, some participants discontinued INSTI due to anemia  
38  
39 adverse events [20]. However, many studies included few participants or were mostly  
40  
41 from an earlier ART era when older ART medications were predominantly used. The  
42  
43 objective of this study was to compare rates of anemia and severe anemia development  
44  
45  
46  
47  
48  
49  
50  
51  
52  
53  
54  
55  
56  
57  
58  
59  
60

1  
2  
3 as well as changes in Hb overtime based on classes of ART used in the current  
4  
5  
6 treatment era.  
7  
8  
9  
10

## 11 12 **Methods:**

### 13 Overview and setting:

14  
15  
16  
17  
18 The present study included PLWH in care in the Centers for AIDS Research  
19  
20 (CFAR) Network of Integrated Clinical Systems (CNICS) cohort during the period of  
21  
22 January 1, 2010 to March 31, 2018. The CNICS cohort has been described in detail  
23  
24 elsewhere [21]. Briefly, CNICS is a dynamic prospective clinical cohort of >32,000 adult  
25  
26 PLWH receiving care at eight participating sites across the U.S. Comprehensive clinical  
27  
28 data, including diagnoses, ART and other medications, laboratory test results,  
29  
30 demographic information, and historical information, including ART use before  
31  
32 enrollment, is collected through electronic medical records and other institutional data  
33  
34 systems at each site and harmonized in the CNICS data repository. Medication data  
35  
36 including ART use are entered into the electronic medical records by clinicians or  
37  
38 prescription fill/refill data are uploaded directly from pharmacy systems and verified  
39  
40 through medical record review. Participants entered the current study on January 1,  
41  
42 2010 and the earliest date that they met the following enrollment criteria (cohort entry  
43  
44 date): a) enrollment in CNICS for  $\geq 6$  months to allow time for covariate ascertainment  
45  
46 and b) use of an ART regimen containing a PI, NNRTI, or INSTI. In addition, all  
47  
48  
49  
50  
51  
52  
53  
54  
55  
56  
57  
58  
59  
60

1  
2  
3 participants were required to have at least 2 available hemoglobin lab values during  
4  
5  
6 study follow-up. Figure 1 shows inclusion criteria and exclusions made. Informed  
7  
8  
9 consent was obtained from all participants and institutional review boards at each site  
10  
11 approved CNICS protocols.  
12

### 13 14 15 16 17 Exposure:

18  
19 The exposure of interest was the ART core drug class (NNRTI, INSTI or PI)  
20  
21 prescribed as part of an ART regimen. Participants switching to different core drugs  
22  
23 within the same class were considered to be continually exposed to the same core drug  
24  
25 class. Individuals with a gap in ART use of 6 or more months were censored at the start  
26  
27 of the gap and did not re-enter the study.  
28  
29  
30  
31

32  
33 Person-time on INSTIs or PIs was compared to the reference of NNRTI use. In  
34  
35 addition, some PLWH in this cohort had prescriptions for multiple core classes  
36  
37 simultaneously. Participants with regimens containing more than 1 core class were  
38  
39 categorized separately as users of “multiple core classes” in analyses. Boosting agents  
40  
41 (e.g. boosted ritonavir, or cobicistat) were not considered a 2<sup>nd</sup> core agent.  
42  
43  
44  
45  
46  
47  
48

### 49 Outcome ascertainment:

50  
51  
52 Hb levels, expressed in grams per deciliter (g/dl), were ascertained using  
53  
54 inpatient and outpatient laboratory data obtained as part of clinical care. Outcomes  
55  
56  
57  
58  
59  
60

1  
2  
3 included incident anemia (first Hb measure below 10 g/dl), incident severe anemia (first  
4  
5 Hb measure below 7.5 g/d) and changes in hemoglobin level. Another outcome, chronic  
6  
7 anemia, defined as anemia lasting for  $\geq 6$  months was also examined. Chronic anemia  
8  
9 was defined as Hb lab results on two separate occasions at least 6 months apart which  
10  
11 were consistently in the anemic range without any Hb values above the anemia range  
12  
13 during this 6-month period.  
14  
15  
16  
17  
18  
19  
20  
21

### 22 Participant characteristics:

23  
24 Characteristics that were analyzed as confounders of the association between  
25  
26 ART core drugs and incident anemia, severe anemia or change in hemoglobin overtime  
27  
28 included: age, sex, race/ethnicity, CNICS site, hepatitis C virus (HCV) coinfection,  
29  
30 kidney function measured using estimated glomerular filtration rate (eGFR, categorized  
31  
32 as  $<30$ , 30-59, or  $\geq 60$  mL/minute/1.73 m<sup>2</sup>) [22], CD4 count (categorized as  $\geq 500$ , 350-499,  
33  
34 200-399, 100-199 or  $<100$  cells/mm<sup>3</sup>), viral load (VL, assessed as  $\log_{10}(\text{VL}+1)$ ), and time in  
35  
36 care at CNICS sites, defined as time from cohort entry date until the last available  
37  
38 CNICS activity: either last lab date or last visit. HCV, eGFR, CD4 count and VL were  
39  
40 assessed as part of clinical care visits and were time-updated as repeated measures  
41  
42 occurred. All covariates were selected *a priori*, based on review of the literature and  
43  
44 clinical knowledge. In addition, assessment of self-reported ART adherence was  
45  
46 available for a subset of ~55% of the study population who were in care after each  
47  
48  
49  
50  
51  
52  
53  
54  
55  
56  
57  
58  
59  
60

1  
2  
3 individual site initiated a clinical assessment of patient reported outcomes including  
4  
5 adherence [23].  
6  
7  
8  
9

### 10 Statistical analysis:

11 Baseline characteristics are presented for all participants at the cohort entry date.

12  
13  
14 Median and interquartile range (IQR) are displayed for continuous variables and  
15  
16 frequencies and proportions are displayed for categorical variables.  
17  
18  
19

20  
21  
22 Two multivariable Cox proportional hazards regression analyses were  
23  
24 conducted, one among the subset of PLWH who were anemia-free at baseline to  
25  
26 determine associations between time-updated NNRTI, PI, and INSTI use and  
27  
28 development of anemia, and another among the subset of participants who were free of  
29  
30 severe anemia at baseline to determine associations between time-updated NNRTI, PI,  
31  
32 and INSTI use and development of severe anemia.  
33  
34  
35  
36  
37

38 Participants were censored at a) the time they developed the outcome of interest,  
39  
40 or b) at the time of last activity in CNICS, or c) at the time of death, or d) at the time of  
41  
42 administrative censoring per site, or e) at the time they no longer were prescribed one of  
43  
44 the ART core classes, whichever came first. The timescale for the models was time since  
45  
46 cohort entry. Complete case analysis methods were used (<2% had missing data).  
47  
48  
49  
50

51 In a sensitivity analysis, we examined ART-naïve PLWH who initiated a drug in  
52  
53 one of the ART classes of interest during study follow-up. Follow-up in this analysis  
54  
55  
56  
57  
58  
59  
60

1  
2  
3 began when a person began their initial ART regimen and extended until the earliest  
4  
5  
6 time of anemia occurrence, last activity in CNICS, time of death, administrative  
7  
8  
9 censoring, or at the time their initial regimen ended. PI or INSTI use were compared to  
10  
11 the reference, NNRTI use. We also examined the change in Hb overtime using mixed  
12  
13  
14 models among this ART-naïve population.  
15

16  
17 Linear mixed effects models with random slopes for time were used to examine  
18  
19 the association of ART core classes with Hb levels among all PLWH after adjustment for  
20  
21 the same characteristics as in the incident anemia and severe anemia analyses. Mixed-  
22  
23 effects models utilize random slopes and intercepts at the participant level to handle  
24  
25 irregular patterns of repeated measures over follow-up [24]. All analyses were  
26  
27  
28 performed using Stata version 14.2.  
29  
30  
31  
32  
33  
34  
35

#### 36 Patient and public involvement:

37  
38 There was no patient or public participation in the present study.  
39  
40  
41  
42  
43

#### 44 **Results:**

45  
46 In total, 16,505 PLWH met inclusion criteria and were included in these analyses  
47  
48 (Figure 1). Participants had an average of 11 outpatient hemoglobin values measured  
49  
50 during a median follow-up of 4.9 (IQR 3.0-7.2) years. A total of 12,626 (76%) were free of  
51  
52 anemia at baseline, and 15,357 (93%) were free of severe anemia at baseline. Table 1  
53  
54  
55  
56  
57  
58  
59  
60

1  
2  
3 provides baseline characteristics for all study participants, and additionally shows  
4  
5 characteristics for the 1,040 participants who developed anemia during follow-up as  
6  
7 well as the 488 participants who developed severe anemia during follow-up. The mean  
8  
9 age of study participants was 46 years at cohort entry, 20% were female, and 19% were  
10  
11 co-infected with HCV. At baseline, 18% were prescribed NNRTIs, 53% were prescribed  
12  
13 PIs, 14% were prescribed INSTIs and 16% used multiple cores. INSTI core agents were  
14  
15 increasingly used over the last few years of the enrollment period (Figure 2), and the  
16  
17 proportion of those prescribed multiple cores were comprised of INSTI plus another  
18  
19 core class with increasing frequency as study years progressed.  
20  
21  
22  
23  
24  
25  
26

27  
28 The incidence of anemia was 2.1/100 person-years and the incidence of severe  
29  
30 anemia was 0.8/100 person-years. INSTI use was associated with an increased risk of  
31  
32 anemia (aHR 1.17, 95%CI 0.94-1.47) compared to NNRTIs, though this was not  
33  
34 statistically significant (Table 2). Use of multiple core classes together was also  
35  
36 associated with an increased risk of anemia (aHR 1.30, 95%CI 1.06-1.60)) while no  
37  
38 associations were found between PI use and anemia (aHR of 1.00, 95%CI 0.83-1.21). In  
39  
40 adjusted analyses restricted to participants free of severe anemia at baseline (Table 2),  
41  
42 INSTI use was associated with an increased risk of severe anemia (aHR 1.55, 95%CI  
43  
44 1.11-2.17) compared to NNRTI use. Time on multiple ART core classes was associated  
45  
46 with an increased risk of anemia (aHR 1.35 (0.99-1.85), though this was not statistically  
47  
48 significant, and no association was found for PIs (aHR 1.01 (0.74-1.36) Among the 12,626  
49  
50  
51  
52  
53  
54  
55  
56  
57  
58  
59  
60



1  
2  
3 PLWH who were free of anemia at baseline, 225 developed chronic anemia (lasting for  
4  
5  $\geq 6$  months), during follow-up. For chronic anemia, results were similar to those in the  
6  
7 primary analysis. Relative to NNRTI use, person-time on multiple core classes was  
8  
9 associated with an aHR 2.26 (95%CI 0.98-5.23), person-time on an INSTI with an aHR of  
10  
11 1.94 (95%CI 0.80-4.68) and person-time on a PI with an aHR of 1.29 (95%CI 0.55-3.06).  
12  
13  
14  
15

16  
17 Average hemoglobin levels remained steady during follow-up; the mean level  
18  
19 was 14.1 g/dL (IQR 12.7-15.1) at baseline and 14.0 (IQR 12.6-15.2) g/dL at the last  
20  
21 available measurement per person. Relative to NNRTI use, a decrease in hemoglobin  
22  
23 level over time was associated with both INSTI use (-0.06 g/dL per year, 95%CI -0.10, -  
24  
25 0.03) and use of multiple core classes (-0.14, 95%CI -0.18, -0.11). No association was  
26  
27 found for PI use (-0.01, 95%CI -0.04, 0.03). (Table 3).  
28  
29  
30  
31  
32

33 The sensitivity analysis restricted to ART-naïve PLWH included 6,426 PLWH  
34  
35 who were free of prevalent anemia at baseline, of whom 378 developed anemia.  
36  
37 Compared to NNRTI initiators, those initiating a PI had an aHR of 0.78 (0.56-1.08) while  
38  
39 those initiating an INSTI had an aHR of 1.15 (95%CI 0.92-1.45) (Supplemental Table 1).  
40  
41  
42 The mixed model examining change in Hb overtime among ART-naïve PLWH  
43  
44 initiating one of the ART core classes of interest included 7,264 participants. Compared  
45  
46 to NNRTI initiators, a decrease in Hb was found for PI use (-0.8g/dL per year, 95%CI -  
47  
48 0.16, -0.01), while INSTI use was associated with a larger decrease in Hb level overtime  
49  
50 (-0.15g/dL per year, 95%CI -0.22, -0.09) (Supplemental Table 2).  
51  
52  
53  
54  
55  
56  
57  
58  
59  
60

**Discussion:**

In this study of 16,505 PLWH in care within the United States in the current treatment era (2010 and after), we observed that INSTI use, or time on multiple core ART classes used was associated with decreases in hemoglobin levels during follow-up compared to NNRTI use. We found that INSTI use was associated with an elevated aHR for anemia (aHR 1.17, 95%CI 0.94-1.47) and a significantly elevated aHR for severe anemia (1.55, 95%CI 1.11-2.17) as well as a significant decrease in hemoglobin levels over time. Furthermore, the naïve user analysis had nearly identical findings, although not significant with larger CIs. These findings could have implications for the treatment approach that should be used in people with risk factors for anemia.

This study's strengths include its large and geographically diverse study population and longitudinal data structure. However, there are limitations of this study to consider including the observational nature of the data, which may be subject to residual confounding. Additionally, we did not exclude participants with conditions strongly associated with anemia or hemoglobin level through non-traditional HIV mechanisms, including those on dialysis, receiving erythropoietin, or with severe bleeding, which likely caused some of the anemia cases in this analysis. However, in the sensitivity analysis focusing on factors associated with chronic anemia (less likely due to bleeding), findings for INSTI vs. NNRTI core regimens were similar to those

1  
2  
3 including all PLWH who became anemic. A final limitation is that ART medication use  
4  
5 comes from prescriptions written which may not be filled or may be filled but never  
6  
7 taken, although self-reported adherence was high (approximately 98%) in the subset for  
8  
9 whom adherence information was available. CNICS participants who provided  
10  
11 adherence information have been shown to be representative of the overall population  
12  
13 of PLWH in CNICS [23, 25]. Finally, the fact that this study was conducted among  
14  
15 PLWH in care in the U.S. who are on ART may limit the generalizability of findings to  
16  
17 PLWH who are not on ART or who live outside of the U.S.  
18  
19  
20  
21  
22  
23  
24

25 One study, conducted during the newer-era of HIV treatment with drugs other  
26  
27 than AZT, (during 2008-2012) presented findings for AZT versus non-AZT regimens,  
28  
29 finding an increased risk of anemia among AZT compared to non-AZT regimens  
30  
31 (HR=2.84, 95%CI 1.52-5.31) [26]. However, anemia risk was not analyzed separately for  
32  
33 the use of specific classes of ART, resulting in the inability of comparison to the present  
34  
35 study's findings and a lack of generalizability to PLWH who are treated with newer  
36  
37 ART core agents.  
38  
39  
40  
41  
42  
43

44 It is possible that PLWH in our study whose HIV is progressing due to resistance  
45  
46 or other complications may get switched to an INSTI. This, in addition to prior  
47  
48 knowledge that poorly controlled HIV parameters are on their own a risk factor for  
49  
50 anemia [6, 27, 28], could result in confounding by indication. However, the switch to  
51  
52 INSTI core regimens since their approval in 2007 has been widespread in this  
53  
54  
55  
56  
57  
58  
59  
60

1  
2  
3 population (Figure 2) and INSTIs are recommended for use as initial regimens [29]. In  
4  
5  
6 addition, we rigorously controlled for many of the important HIV-related factors that  
7  
8  
9 correspond to poorly-controlled HIV, and our sensitivity analysis examining new users  
10  
11  
12 of ART medications failed to reinforce the notion that an increased risk of anemia  
13  
14  
15 among INSTI core regimen users could be entirely explained by sicker participants  
16  
17  
18 getting switched to these therapies.

19  
20 PLWH on multiple core classes were in a different category in our analyses.  
21  
22 There are several reasons PLWH may be prescribed multiple core classes. For example,  
23  
24  
25 sometimes PLWH are prescribed multiple core classes to ensure they receive a complete  
26  
27  
28 regimen while awaiting approval for specific agents from their insurance company.  
29  
30  
31 However, the primary concern was that they were receiving multiple core classes due to  
32  
33  
34 provider concerns such as prior failed regimens which may also increase their risk of  
35  
36  
37 anemia.

38  
39 In conclusion, in this large, diverse, multicenter cohort of PLWH, we found that  
40  
41  
42 INSTI use and time on multiple ART core classes were associated with progression to  
43  
44  
45 anemia and a lowering of Hb level. INSTI use was also associated with severe anemia  
46  
47  
48 risk. Our findings suggest that careful selection of ART regimen could mitigate anemia  
49  
50  
51 development, although this anemia risk needs to be balanced with the possibility of  
52  
53  
54 improvement in overall HIV care [30]. Further research is needed to replicate the  
55  
56  
57 finding of INSTI core regimen use and anemia risk and to understand the underlying  
58  
59  
60

1  
2  
3  
4  
5  
6  
7  
8  
9  
10  
11  
12  
13  
14  
15  
16  
17  
18  
19  
20  
21  
22  
23  
24  
25  
26  
27  
28  
29  
30  
31  
32  
33  
34  
35  
36  
37  
38  
39  
40  
41  
42  
43  
44  
45  
46  
47  
48  
49  
50  
51  
52  
53  
54  
55  
56  
57  
58  
59  
60

mechanisms. If confirmed, screening for anemia development in users of INSTIs may be  
beneficial.

## Figure Legends

Figure 1: Flow chart for inclusion/exclusion criteria for 22,027 PLWH in care at CNICS after 1/2010. Exclusions were made for those not exposed to any of the ART core classes, those with fewer than 2 hemoglobin levels, and those missing baseline covariates.

Figure 2. Proportion of study population using various ART classes during complete years of study follow-up. This figure shows the trends in use of the ART core classes during 2010-2017.

Table 1. Baseline characteristics of PLWH in CNICS who were receiving an ART core agent of interest<sup>a</sup>

|                                                              | All participants<br>(N=16,505) | Developed anemia during follow-up<br>(n=1,040) | Developed severe anemia during follow-up<br>(n=488) |
|--------------------------------------------------------------|--------------------------------|------------------------------------------------|-----------------------------------------------------|
| Age (median, IQR)                                            | 46 (38-52)                     | 47 (40-54)                                     | 46 (39-54)                                          |
| Female                                                       | 3,265 (20)                     | 276 (27)                                       | 158 (32)                                            |
| Race/ethnicity                                               |                                |                                                |                                                     |
| White                                                        | 7,263 (44)                     | 396 (38)                                       | 157 (32)                                            |
| Black                                                        | 6,386 (39)                     | 499 (48)                                       | 254 (52)                                            |
| Hispanic                                                     | 2,129 (13)                     | 106 (10)                                       | 58 (12)                                             |
| Other/missing                                                | 727 (4)                        | 39 (4)                                         | 19 (4)                                              |
| Years in CNICS at cohort entry <sup>a</sup><br>(median, IQR) | 5.6 (2.5-9.1)                  | 5.8 (2.4-9.5)                                  | 5.5 (2.8-9.1)                                       |
| Viral load $\geq$ 400 copies/ml                              | 3,706 (23)                     | 283 (27)                                       | 172 (35)                                            |
| CD4 count (cells/mm <sup>3</sup> )                           |                                |                                                |                                                     |
| <100                                                         | 1,225 (7)                      | 112 (11)                                       | 90 (18)                                             |
| 100-199                                                      | 1,497 (9)                      | 96 (9)                                         | 63 (13)                                             |
| 200-349                                                      | 3,027 (18)                     | 216 (21)                                       | 113 (23)                                            |
| 350-499                                                      | 3,462 (21)                     | 226 (22)                                       | 80 (16)                                             |
| $\geq$ 500                                                   | 7,294 (44)                     | 390 (38)                                       | 142 (29)                                            |
| Hepatitis C virus coinfection                                | 3,161 (19)                     | 303 (29)                                       | 139 (28)                                            |
| Kidney function (eGFR)                                       |                                |                                                |                                                     |
| <30                                                          | 295 (2)                        | 36 (3)                                         | 42 (9)                                              |
| 30-59                                                        | 921 (6)                        | 80 (8)                                         | 51 (10)                                             |
| $\geq$ 60                                                    | 15,289 (92)                    | 924 (89)                                       | 395 (81)                                            |
| Hemoglobin (g/dL) (median, IQR)                              | 14.1 (12.8-15.2)               | 13.3 (12.2-14.4)                               | 12.4 (10.8-13.8)                                    |

|                                                                              |             |             |            |
|------------------------------------------------------------------------------|-------------|-------------|------------|
| BMI (kg/m <sup>2</sup> )                                                     |             |             |            |
| <18.5                                                                        | 516 (3)     | 36 (4)      | 30 (6)     |
| 18.5 to <25.0                                                                | 6,809 (43)  | 426 (42)    | 211 (45)   |
| 25.0 to <30.0                                                                | 5,297 (33)  | 301 (30)    | 117 (25)   |
| ≥30.0                                                                        | 3,233 (20)  | 245 (24)    | 115 (24)   |
| ART class                                                                    |             |             |            |
| Non-nucleoside reverse-<br>Transcriptase inhibitor                           | 2,901 (18)  | 177 (17)    | 70 (14)    |
| Protease inhibitor                                                           | 8,713 (53)  | 558 (71)    | 251 (51)   |
| Integrase strand transfer<br>inhibitor                                       | 2,318 (14)  | 93 (9)      | 46 (10)    |
| Multiple core classes                                                        | 2,573 (16)  | 212 (20)    | 121 (25)   |
| Self-reported adherence (on a<br>100-point scale) (median, IQR) <sup>b</sup> | 98 (92-100) | 98 (91-100) | 96 (89-99) |

<sup>a</sup>Cohort entry date was defined as the earliest date during January 1, 2010- March 31, 2018 that a person had 6+ months in CNICS care and were using an ART core agent of interest.

<sup>b</sup>For the 55% of the population who reported medication adherence

Abbreviations: PLWH: people living with HIV, CNICS: Centers for AIDS Research Network of Integrated Clinical Systems, ART: antiretroviral therapy, eGFR: estimated glomerular filtration rate



Table 2: Association of ART classes with incident anemia (hemoglobin<10 g/dL), severe anemia (hemoglobin<7.5 g/dL) or chronic anemia (6+ months of anemia)

| ART Regimen           | Hazard Ratio of incident anemia (n=12,626) |                       | Hazard Ratio of incident severe anemia (n=15,357) |                       | Hazard Ratio of incident chronic anemia (n=12,626) |                       |
|-----------------------|--------------------------------------------|-----------------------|---------------------------------------------------|-----------------------|----------------------------------------------------|-----------------------|
|                       | Unadjusted                                 | Adjusted <sup>a</sup> | Unadjusted                                        | Adjusted <sup>a</sup> | Unadjusted                                         | Adjusted <sup>a</sup> |
| NNRTI (REF)           | 1.00                                       | 1.00                  | 1.00                                              | 1.00                  | 1.00                                               | 1.00                  |
| PI                    | 1.26 (1.05-1.52)                           | 1.00 (0.83-1.21)      | 1.37 (1.02-1.83)                                  | 1.01 (0.74-1.36)      | 1.43 (0.61-3.35)                                   | 1.29 (0.55-3.06)      |
| INSTI                 | 1.39 (1.11-1.75)                           | 1.17 (0.94-1.47)      | 1.96 (1.40-2.75)                                  | 1.55 (1.11-2.17)      | 2.05 (0.85-4.94)                                   | 1.94 (0.80-4.68)      |
| Multiple core classes | 2.02 (1.65-3.48)                           | 1.30 (1.06-1.60)      | 2.70 (1.99-3.67)                                  | 1.35 (0.99-1.85)      | 3.46 (1.51-7.93)                                   | 2.26 (0.98-5.23)      |

<sup>a</sup>Adjusted for age, sex, race/ethnicity, CNICS site, Hepatitis C virus status, CD4 count, viral load, kidney function (eGF)

Abbreviations: ART: antiretroviral therapy, NNRTI: non-nucleoside reverse-transcriptase inhibitor, PI: protease inhibitor, INSTI: integrase strand transfer inhibitor

For peer review only

Table 3. Association of ART classes with change in hemoglobin level during follow-up in adjusted analyses (linear mixed-effect model); N=16,505

| ART class             | Coefficient <sup>a</sup> | 95% CI       | P-value |
|-----------------------|--------------------------|--------------|---------|
| NNRTI (REF)           |                          |              |         |
| PI                    | -0.01                    | -0.04, 0.03  | 0.675   |
| INSTI                 | -0.06                    | -0.10, -0.03 | <0.001  |
| Multiple core classes | -0.14                    | -0.18, -0.11 | <0.001  |

1  
2  
3<sup>a</sup>Coefficient is the mean difference per year in Hb (g/dL) for each core regimen relative  
4 to the NNRTI core regimen, after adjustment for site, age, sex, race/ethnicity, hepatitis C  
5 virus coinfection, CD4 cell count, viral load, eGFR and years in study.  
6

7 Abbreviations: ART: antiretroviral therapy, NNRTI: non-nucleoside reverse-  
8 transcriptase inhibitor, PI: protease inhibitor, INSTI: integrase strand transfer inhibitor  
9  
10  
11  
12  
13  
14  
15  
16  
17  
18  
19  
20  
21  
22  
23  
24  
25  
26  
27  
28  
29  
30  
31  
32  
33  
34  
35  
36  
37  
38  
39  
40  
41  
42  
43  
44  
45  
46  
47  
48  
49  
50

## 51 **References:**

- 52  
53  
54 1. *Division of AIDS. Table for Grading the Severity of Adult and Pediatric Adverse Events.*  
55 <http://rcc.tech-res.com/safetyandpharmacovigilance/>. Accessed 3/1/2014.  
56  
57  
58  
59  
60

2. Redig, A.J. and N. Berliner, *Pathogenesis and clinical implications of HIV-related anemia in 2013*. Hematology Am Soc Hematol Educ Program, 2013. **2013**: p. 377-81.
3. Semba, R.D., et al., *Prevalence and cumulative incidence of and risk factors for anemia in a multicenter cohort study of human immunodeficiency virus-infected and -uninfected women*. Clin Infect Dis, 2002. **34**(2): p. 260-6.
4. Belperio, P.S. and D.C. Rhew, *Prevalence and outcomes of anemia in individuals with human immunodeficiency virus: a systematic review of the literature*. Am J Med, 2004. **116 Suppl 7A**: p. 27S-43S.
5. Sullivan, P.S., et al., *Epidemiology of anemia in human immunodeficiency virus (HIV)-infected persons: results from the multistate adult and adolescent spectrum of HIV disease surveillance project*. Blood, 1998. **91**(1): p. 301-8.
6. Mocroft, A., et al., *Anaemia is an independent predictive marker for clinical prognosis in HIV-infected patients from across Europe. EuroSIDA study group*. AIDS, 1999. **13**(8): p. 943-50.
7. Moore, R.D., J.C. Keruly, and R.E. Chaisson, *Anemia and survival in HIV infection*. J Acquir Immune Defic Syndr Hum Retrovirol, 1998. **19**(1): p. 29-33.
8. Graham, N.M., et al., *CD4+ lymphocyte response to zidovudine as a predictor of AIDS-free time and survival time*. J Acquir Immune Defic Syndr, 1993. **6**(11): p. 1258-66.
9. Mocroft, A., et al., *Haemoglobin and anaemia in the SMART study*. Antivir Ther, 2011. **16**(3): p. 329-37.
10. Harris, R.J., et al., *Prognostic importance of anaemia in HIV type-1-infected patients starting antiretroviral therapy: collaborative analysis of prospective cohort studies*. Antivir Ther, 2008. **13**(8): p. 959-67.
11. McArthur, J.C., et al., *Dementia in AIDS patients: incidence and risk factors. Multicenter AIDS Cohort Study*. Neurology, 1993. **43**(11): p. 2245-52.
12. Anude, C.J., et al., *Immuno-virologic outcomes and immuno-virologic discordance among adults alive and on anti-retroviral therapy at 12 months in Nigeria*. BMC Infect Dis, 2013. **13**: p. 113.
13. Kowalska, J.D., et al., *Current hemoglobin levels are more predictive of disease progression than hemoglobin measured at baseline in patients receiving antiretroviral treatment for HIV type 1 infection*. AIDS Res Hum Retroviruses, 2007. **23**(10): p. 1183-8.
14. Lundgren, J.D., et al., *A clinically prognostic scoring system for patients receiving highly active antiretroviral therapy: results from the EuroSIDA study*. J Infect Dis, 2002. **185**(2): p. 178-87.
15. Zauli, G., et al., *tat protein stimulates production of transforming growth factor-beta 1 by marrow macrophages: a potential mechanism for human immunodeficiency virus-1-induced hematopoietic suppression*. Blood, 1992. **80**(12): p. 3036-43.
16. Moore, R.D. and D. Forney, *Anemia in HIV-infected patients receiving highly active antiretroviral therapy*. J Acquir Immune Defic Syndr, 2002. **29**(1): p. 54-7.
17. Kerkhoff, A.D., et al., *Resolution of anaemia in a cohort of HIV-infected patients with a high prevalence and incidence of tuberculosis receiving antiretroviral therapy in South Africa*. BMC Infect Dis, 2014. **14**: p. 3860.
18. Volberding, P.A., et al., *Anemia in HIV infection: clinical impact and evidence-based management strategies*. Clin Infect Dis, 2004. **38**(10): p. 1454-63.
19. Harrison, S.A., *Management of anemia in patients receiving protease inhibitors*. Gastroenterol Hepatol (N Y), 2012. **8**(4): p. 254-6.

- 1  
2  
3  
4  
5  
6  
7  
8  
9  
10  
11  
12  
13  
14  
15  
16  
17  
18  
19  
20  
21  
22  
23  
24  
25  
26  
27  
28  
29  
30  
31  
32  
33  
34  
35  
36  
37  
38  
39  
40  
41  
42  
43  
44  
45  
46  
47  
48  
49  
50  
51  
52  
53  
54  
55  
56  
57  
58  
59  
60
20. Mullick C MD, Belew Y, *Clinical Review Dolutegravir NDA 204790 SN 00. 2012.*
  21. Kitahata, M.M., et al., *Cohort profile: the Centers for AIDS Research Network of Integrated Clinical Systems.* Int J Epidemiol, 2008. **37**(5): p. 948-55.
  22. Levey, A.S., et al., *A new equation to estimate glomerular filtration rate.* Ann Intern Med, 2009. **150**(9): p. 604-12.
  23. Fredericksen, R., et al., *Integrating a web-based, patient-administered assessment into primary care for HIV-infected adults.* J AIDS HIV Res, 2012. **4**(2): p. 47-55.
  24. Laird, N.M. and J.H. Ware, *Random-effects models for longitudinal data.* Biometrics, 1982. **38**(4): p. 963-74.
  25. Crane, H.M., et al., *A Comparison of Adherence Timeframes Using Missed Dose Items and Their Associations with Viral Load in Routine Clinical Care: Is Longer Better?* AIDS Behav, 2017. **21**(2): p. 470-480.
  26. Wolde HM, L.W., YMelaku YA, Girmay KH. , *Incidence and Risk Factors of Anemia among HIV/AIDS Patients Taking Anti-Retroviral Therapy at Tertiary Hospitals in Addis Ababa, Ethiopia: A Retrospective Cohort Study.* Journal of HIV/AIDS and Infectious Diseases, 2013.
  27. Levine, A.M., et al., *Prevalence and correlates of anemia in a large cohort of HIV-infected women: Women's Interagency HIV Study.* J Acquir Immune Defic Syndr, 2001. **26**(1): p. 28-35.
  28. Zhou, J., et al., *Short-term risk of anaemia following initiation of combination antiretroviral treatment in HIV-infected patients in countries in sub-Saharan Africa, Asia-Pacific, and central and South America.* J Int AIDS Soc, 2012. **15**(1): p. 5.
  29. *Panel on Antiretroviral Guidelines for Adults and Adolescents. Guidelines for the Use of Antiretroviral Agents in Adults and Adolescents Living with HIV. Department of Health and Human Services. Available at <http://www.aidsinfo.nih.gov/ContentFiles/AdultandAdolescentGL.pdf>. Accessed [October, 2018]*
  30. Nance, R.M., et al., *HIV Viral Suppression Trends Over Time Among HIV-Infected Patients Receiving Care in the United States, 1997 to 2015: A Cohort Study.* Ann Intern Med, 2018. **169**(6): p. 376-384.

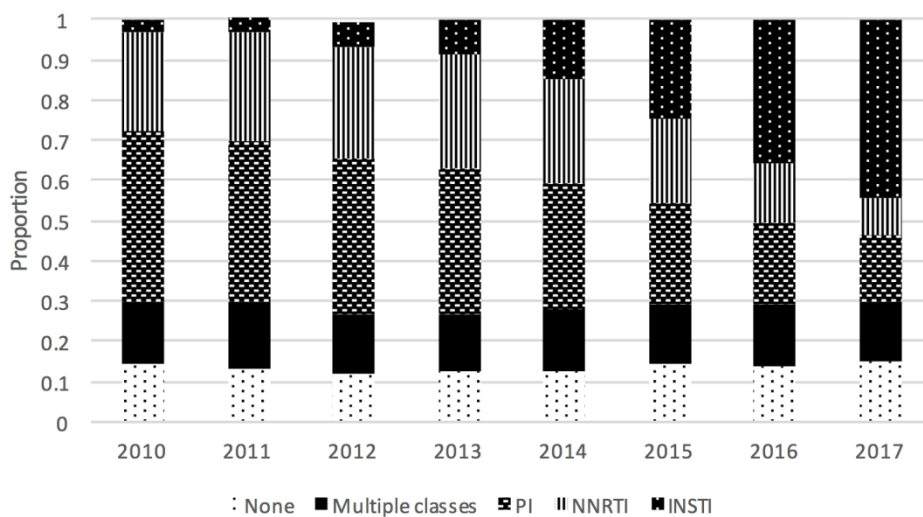

Figure 2. Proportion of study population using various ART classes during complete years of study follow-up. This figure shows the trends in use of the ART core classes during 2010-2017.

142x79mm (300 x 300 DPI)

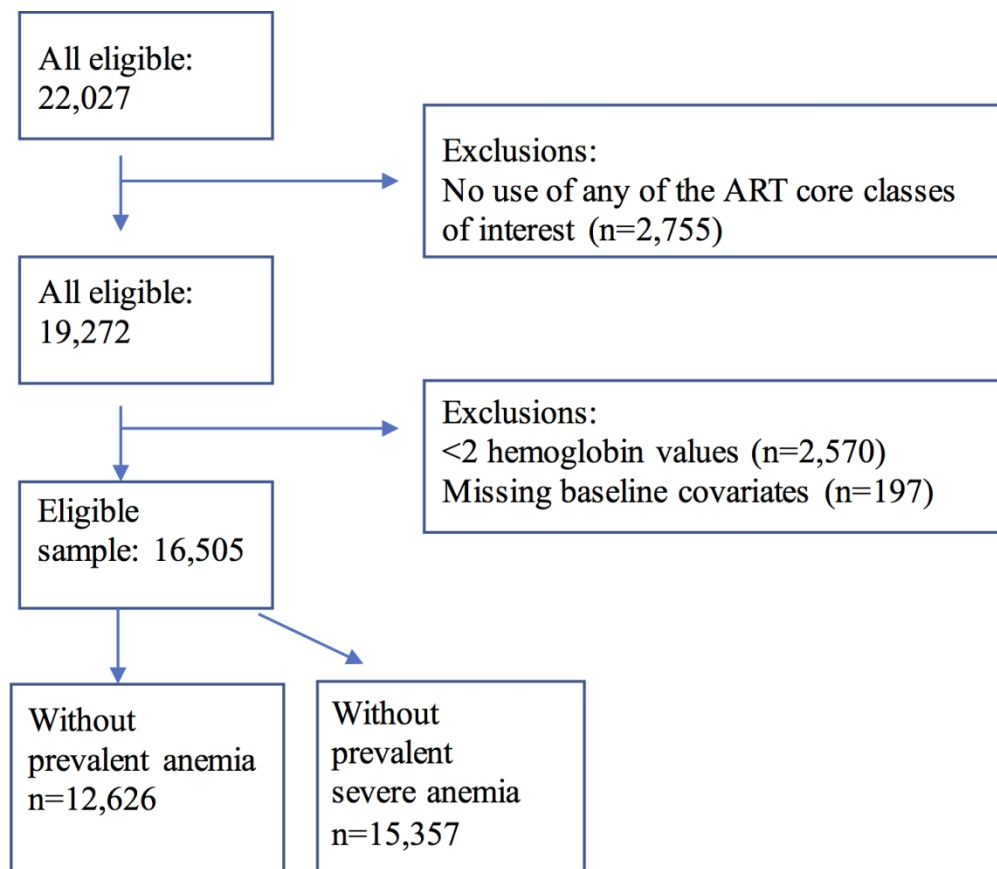

Caption : Figure 1: Flow chart for inclusion/exclusion criteria for 22,027 PLWH in care at CNICS after 1/2010. Exclusions were made for those not exposed to any of the ART core classes, those with fewer than 2 hemoglobin levels, and those missing baseline covariates.

125x108mm (300 x 300 DPI)

Supplemental Table 1: Association of ART classes with incident anemia among naïve users

| ART class   | Hazard Ratio of incident anemia (n=6,426) |                       |
|-------------|-------------------------------------------|-----------------------|
|             | Unadjusted                                | Adjusted <sup>a</sup> |
| NNRTI (REF) | 1.00                                      | 1.00                  |
| PI          | 0.92 (0.67-1.27)                          | 0.78 (0.56-1.08)      |
| INSTI       | 1.73 (1.39-2.15)                          | 1.15 (0.92-1.45)      |

Abbreviations: ART: antiretroviral therapy, NNRTI: non-nucleoside reverse-transcriptase inhibitor, PI: protease inhibitor, INSTI: integrase strand transfer inhibitor



Supplemental Table 2. Association of ART classes with change in hemoglobin level during follow-up in adjusted analyses among naïve users (linear mixed-effect model); N=7,264

| ART class   | Coefficient <sup>a</sup> | 95% CI       | P-value |
|-------------|--------------------------|--------------|---------|
| NNRTI (REF) |                          |              |         |
| PI          | -0.08                    | -0.16, -0.01 | 0.031   |
| INSTI       | -0.15                    | -0.22, -0.09 | <0.001  |

<sup>a</sup>Coefficient is the mean difference per year in Hb (g/dL) for each core regimen relative to the NNRTI core regimen, after adjustment for site, age, sex, race/ethnicity, hepatitis C virus coinfection, CD4 cell count, viral load, eGFR and years in study.

Abbreviations: ART: antiretroviral therapy, NNRTI: non-nucleoside reverse-transcriptase inhibitor, PI: protease inhibitor, INSTI: integrase strand transfer inhibitor

STROBE Statement—Checklist of items that should be included in reports of *cohort studies*

|                                                         | Item No | Recommendation                                                                                                                                                                                                                                                                                                         |
|---------------------------------------------------------|---------|------------------------------------------------------------------------------------------------------------------------------------------------------------------------------------------------------------------------------------------------------------------------------------------------------------------------|
| ✓ Title and abstract<br>(page 1-title, page 3 abstract) | 1       | (a) Indicate the study's design with a commonly used term in the title or the abstract<br>(b) Provide in the abstract an informative and balanced summary of what was done and what was found                                                                                                                          |
| <b>Introduction</b>                                     |         |                                                                                                                                                                                                                                                                                                                        |
| ✓ Background/rationale<br>(pages 5, 6)                  | 2       | Explain the scientific background and rationale for the investigation being reported                                                                                                                                                                                                                                   |
| ✓ Objectives<br>(page 6)                                | 3       | State specific objectives, including any prespecified hypotheses                                                                                                                                                                                                                                                       |
| <b>Methods</b>                                          |         |                                                                                                                                                                                                                                                                                                                        |
| ✓ Study design<br>(page 6)                              | 4       | Present key elements of study design early in the paper                                                                                                                                                                                                                                                                |
| ✓ Setting<br>(page 6)                                   | 5       | Describe the setting, locations, and relevant dates, including periods of recruitment, exposure, follow-up, and data collection                                                                                                                                                                                        |
| ✓ Participants<br>(page 6)                              | 6       | (a) Give the eligibility criteria, and the sources and methods of selection of participants. Describe methods of follow-up<br>(b) For matched studies, give matching criteria and number of exposed and unexposed                                                                                                      |
| ✓ Variables<br>(pages 7, 8)                             | 7       | Clearly define all outcomes, exposures, predictors, potential confounders, and effect modifiers. Give diagnostic criteria, if applicable                                                                                                                                                                               |
| ✓ Data sources/<br>measurement<br>(pages 7, 8)          | 8*      | For each variable of interest, give sources of data and details of methods of assessment (measurement). Describe comparability of assessment methods if there is more than one group                                                                                                                                   |
| ✓ Bias<br>(page 9)                                      | 9       | Describe any efforts to address potential sources of bias                                                                                                                                                                                                                                                              |
| ✓ Study size<br>(page 6)                                | 10      | Explain how the study size was arrived at                                                                                                                                                                                                                                                                              |
| ✓ Quantitative variables<br>(pages 7, 8)                | 11      | Explain how quantitative variables were handled in the analyses. If applicable, describe which groupings were chosen and why                                                                                                                                                                                           |
| ✓ Statistical methods<br>(pages 8, 9)                   | 12      | (a) Describe all statistical methods, including those used to control for confounding<br>(b) Describe any methods used to examine subgroups and interactions<br>(c) Explain how missing data were addressed<br>(d) If applicable, explain how loss to follow-up was addressed<br>(e) Describe any sensitivity analyses |
| <b>Results</b>                                          |         |                                                                                                                                                                                                                                                                                                                        |
| ✓ Participants<br>(figure 1, page 9)                    | 13*     | (a) Report numbers of individuals at each stage of study—eg numbers potentially eligible, examined for eligibility, confirmed eligible, included in the study, completing follow-up, and analysed<br>(b) Give reasons for non-participation at each stage<br>(c) Consider use of a flow diagram                        |
| ✓ Descriptive data<br>(pages 9, 10)                     | 14*     | (a) Give characteristics of study participants (eg demographic, clinical, social) and information on exposures and potential confounders<br>(b) Indicate number of participants with missing data for each variable of interest<br>(c) Summarise follow-up time (eg, average and total amount)                         |

|    |                                     |     |                                                                                                                                                                                                              |
|----|-------------------------------------|-----|--------------------------------------------------------------------------------------------------------------------------------------------------------------------------------------------------------------|
| 1  | ✓Outcome data<br>(page 10)          | 15* | Report numbers of outcome events or summary measures over time                                                                                                                                               |
| 2  |                                     |     |                                                                                                                                                                                                              |
| 3  |                                     |     |                                                                                                                                                                                                              |
| 4  | ✓Main results<br>(pages 10, 11)     | 16  | (a) Give unadjusted estimates and, if applicable, confounder-adjusted estimates and their precision (eg, 95% confidence interval). Make clear which confounders were adjusted for and why they were included |
| 5  |                                     |     |                                                                                                                                                                                                              |
| 6  |                                     |     |                                                                                                                                                                                                              |
| 7  |                                     |     | (b) Report category boundaries when continuous variables were categorized                                                                                                                                    |
| 8  |                                     |     |                                                                                                                                                                                                              |
| 9  |                                     |     | (c) If relevant, consider translating estimates of relative risk into absolute risk for a meaningful time period                                                                                             |
| 10 |                                     |     |                                                                                                                                                                                                              |
| 11 | ✓Other analyses<br>(page 11)        | 17  | Report other analyses done—eg analyses of subgroups and interactions, and sensitivity analyses                                                                                                               |
| 12 |                                     |     |                                                                                                                                                                                                              |
| 13 |                                     |     |                                                                                                                                                                                                              |
| 14 | <b>Discussion</b>                   |     |                                                                                                                                                                                                              |
| 15 | ✓Key results<br>(page 11)           | 18  | Summarise key results with reference to study objectives                                                                                                                                                     |
| 16 |                                     |     |                                                                                                                                                                                                              |
| 17 |                                     |     |                                                                                                                                                                                                              |
| 18 | ✓Limitations<br>(page 12)           | 19  | Discuss limitations of the study, taking into account sources of potential bias or imprecision. Discuss both direction and magnitude of any potential bias                                                   |
| 19 |                                     |     |                                                                                                                                                                                                              |
| 20 | ✓Interpretation<br>(page 13)        | 20  | Give a cautious overall interpretation of results considering objectives, limitations, multiplicity of analyses, results from similar studies, and other relevant evidence                                   |
| 21 |                                     |     |                                                                                                                                                                                                              |
| 22 |                                     |     |                                                                                                                                                                                                              |
| 23 | ✓Generalisability<br>(pages 12, 13) | 21  | Discuss the generalisability (external validity) of the study results                                                                                                                                        |
| 24 |                                     |     |                                                                                                                                                                                                              |
| 25 |                                     |     |                                                                                                                                                                                                              |
| 26 | <b>Other information</b>            |     |                                                                                                                                                                                                              |
| 27 | ✓Funding<br>(page 2)                | 22  | Give the source of funding and the role of the funders for the present study and, if applicable, for the original study on which the present article is based                                                |
| 28 |                                     |     |                                                                                                                                                                                                              |
| 29 |                                     |     |                                                                                                                                                                                                              |

\*Give information separately for exposed and unexposed groups.

**Note:** An Explanation and Elaboration article discusses each checklist item and gives methodological background and published examples of transparent reporting. The STROBE checklist is best used in conjunction with this article (freely available on the Web sites of PLoS Medicine at <http://www.plosmedicine.org/>, Annals of Internal Medicine at <http://www.annals.org/>, and Epidemiology at <http://www.epidem.com/>). Information on the STROBE Initiative is available at <http://www.strobe-statement.org>.

# BMJ Open

## A study of antiretroviral drug class and anaemia risk in the current treatment era among people living with HIV in the United States: A clinical cohort study

|                                 |                                                                                                                                                                                                                                                                                                                                                                                                                                                                                                                                                                                                                                                                                                                                                                                                                                                                                                                                                          |
|---------------------------------|----------------------------------------------------------------------------------------------------------------------------------------------------------------------------------------------------------------------------------------------------------------------------------------------------------------------------------------------------------------------------------------------------------------------------------------------------------------------------------------------------------------------------------------------------------------------------------------------------------------------------------------------------------------------------------------------------------------------------------------------------------------------------------------------------------------------------------------------------------------------------------------------------------------------------------------------------------|
| Journal:                        | <i>BMJ Open</i>                                                                                                                                                                                                                                                                                                                                                                                                                                                                                                                                                                                                                                                                                                                                                                                                                                                                                                                                          |
| Manuscript ID                   | bmjopen-2019-031487.R1                                                                                                                                                                                                                                                                                                                                                                                                                                                                                                                                                                                                                                                                                                                                                                                                                                                                                                                                   |
| Article Type:                   | Research                                                                                                                                                                                                                                                                                                                                                                                                                                                                                                                                                                                                                                                                                                                                                                                                                                                                                                                                                 |
| Date Submitted by the Author:   | 31-Oct-2019                                                                                                                                                                                                                                                                                                                                                                                                                                                                                                                                                                                                                                                                                                                                                                                                                                                                                                                                              |
| Complete List of Authors:       | Harding, Barbara; University of Washington, Epidemiology<br>Whitney, Bridget; University of Washington, Epidemiology<br>Nance, Robin; University of Washington, Epidemiology<br>Crane, HM; University of Washington, Medicine<br>Burkholder, Greer; University of Alabama at Birmingham<br>Moore, Richard; Johns Hopkins University School of Medicine, Medicine<br>Mathews, William; University of California, San Diego<br>Eron, Joseph; University of North Carolina at Chapel Hill<br>Hunt, Peter; University of California San Francisco<br>Volberding, Paul ; UCSF, Medicine<br>Rodriguez, Benigno ; Case Western Reserve University<br>Mayer, Kenneth; The Fenway Institute at Fenway Health<br>Saag, Michael ; University of Alabama at Birmingham<br>Kitahata, Mari M. ; University of Washington, Medicine<br>Heckbert, Susan; University of Washington, Epidemiology<br>Delaney, Joseph; University of Washington, Department of Epidemiology |
| <b>Primary Subject Heading</b>: | HIV/AIDS                                                                                                                                                                                                                                                                                                                                                                                                                                                                                                                                                                                                                                                                                                                                                                                                                                                                                                                                                 |
| Secondary Subject Heading:      | Epidemiology, Haematology (incl blood transfusion)                                                                                                                                                                                                                                                                                                                                                                                                                                                                                                                                                                                                                                                                                                                                                                                                                                                                                                       |
| Keywords:                       | HIV & AIDS < INFECTIOUS DISEASES, integrase inhibitors, antiretroviral therapy, cohort, Anaemia < HAEMATOLOGY                                                                                                                                                                                                                                                                                                                                                                                                                                                                                                                                                                                                                                                                                                                                                                                                                                            |
|                                 |                                                                                                                                                                                                                                                                                                                                                                                                                                                                                                                                                                                                                                                                                                                                                                                                                                                                                                                                                          |

SCHOLARONE™  
Manuscripts

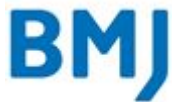

I, the Submitting Author has the right to grant and does grant on behalf of all authors of the Work (as defined in the below author licence), an exclusive licence and/or a non-exclusive licence for contributions from authors who are: i) UK Crown employees; ii) where BMJ has agreed a CC-BY licence shall apply, and/or iii) in accordance with the terms applicable for US Federal Government officers or employees acting as part of their official duties; on a worldwide, perpetual, irrevocable, royalty-free basis to BMJ Publishing Group Ltd ("BMJ") its licensees and where the relevant Journal is co-owned by BMJ to the co-owners of the Journal, to publish the Work in this journal and any other BMJ products and to exploit all rights, as set out in our [licence](#).

The Submitting Author accepts and understands that any supply made under these terms is made by BMJ to the Submitting Author unless you are acting as an employee on behalf of your employer or a postgraduate student of an affiliated institution which is paying any applicable article publishing charge ("APC") for Open Access articles. Where the Submitting Author wishes to make the Work available on an Open Access basis (and intends to pay the relevant APC), the terms of reuse of such Open Access shall be governed by a Creative Commons licence – details of these licences and which [Creative Commons](#) licence will apply to this Work are set out in our licence referred to above.

Other than as permitted in any relevant BMJ Author's Self Archiving Policies, I confirm this Work has not been accepted for publication elsewhere, is not being considered for publication elsewhere and does not duplicate material already published. I confirm all authors consent to publication of this Work and authorise the granting of this licence.

1  
2  
3 1 **A study of antiretroviral drug class and anaemia risk in the**  
4 2 **current treatment era among people living with HIV in the United**  
5 3 **States: A clinical cohort study**  
6 4

7  
8 5 **Authors:** B.N. Harding<sup>1</sup>, B.M. Whitney<sup>1</sup>, R.M. Nance<sup>1</sup>, H.M. Crane<sup>1</sup>,  
9 6 G. Burkholder<sup>2</sup>, R.D. Moore<sup>3</sup>, W.C. Mathews<sup>4</sup>, J.J. Eron<sup>5</sup>, P. W.  
10 7 Hunt<sup>6</sup>, P. Volberding<sup>6</sup>, B. Rodriguez<sup>7</sup>, K.H. Mayer<sup>8</sup>, M.S. Saag<sup>2</sup>,  
11 8 M.M. Kitahata<sup>1</sup>, S.R. Heckbert<sup>1</sup>, J.A.C. Delaney<sup>1</sup>  
12 9

13  
14 10 **Affiliations:**

15 11 <sup>1</sup>University of Washington;

16 12 <sup>2</sup>University of Alabama Birmingham;

17 13 <sup>3</sup>Johns Hopkins University;

18 14 <sup>4</sup>University of California San Diego;

19 15 <sup>5</sup>University of North Carolina, Chapel Hill;

20 16 <sup>6</sup>University of California San Francisco;

21 17 <sup>7</sup>Case Western Reserve University;

22 18 <sup>8</sup>Fenway Health Institute  
23 19

24  
25 20 **Corresponding author:** Barbara N Harding, University of Washington, Department of  
26 21 Epidemiology, 1959 NE Pacific Street, Health Sciences Building F-26, Box 357236, Seattle,  
27 22 WA, 98195. E-mail: hardingb@uw.edu  
28 23

29 24 **Keywords:** antiretroviral agents, cohort, anaemia, integrase  
30 25 inhibitors, protease inhibitors, non-nucleoside reverse  
31 26 transcriptase inhibitors  
32 27

33  
34 28 **Copyright:**

35 29 The Corresponding Author has the right to grant on behalf of all  
36 30 authors and does grant on behalf of all authors, an exclusive  
37 31 license (or non-exclusive for government employees) on a  
38 32 worldwide basis to the BMJ Publishing Group Ltd to permit this  
39 33 article (if accepted) to be published in BMJ editions and any  
40 34 other BMJ PGL products and sublicenses such use and exploit all  
41 35 subsidiary rights, as set out in our license.  
42 36  
43 37

44 38 **Competing interest statement:**

45 39 Dr. Harding reports grants from National Heart, Lung and Blood Institute(NHLBI) during the  
46 40 conduct of the study; Ms. Whitney reports grants from the National Institutes of Health (NIH)  
47 41 during the conduct of the study; Ms. Nance reports grants from NIH during the conduct of the  
48 42 study; Dr. Crane reports grants from NHLBI during the conduct of the study, grants from NIH,  
49 43 grants from ViiV healthcare and grants from PCORI outside the submitted work; Dr. Burkholder  
50 44 reports grants from NIH during the conduct of the study, other from Amgen, Inc outside the  
51 45 submitted work; Dr. Moore reports grants from NHLBI during the conduct of the study; Dr.  
52 46 Mathews reports grants from NHLBI during the conduct of the study; Dr. Eron reports grants  
53 47 from NIH, during the conduct of the study, grants and personal fees from Gilead Sciences, grants  
54 48 and personal fees from ViiV Healthcare, grants and personal fees from Janssen and personal fees  
55 49  
56 50  
57 51  
58 52  
59 53  
60 54

1 from Merck outside the submitted work; Dr. Hunt reports grants from NHLBI during the conduct  
2 of the study, personal fees from Gilead, personal fees from ViiV Healthcare, personal fees from  
3 Janssen and non-financial support from Merck outside the submitted work; Dr. Volberding  
4 reports grants from NHLBI during the conduct of the study, other from Merck outside the  
5 submitted work; Dr. Rodriguez reports grants from NIH during the conduct of the study,  
6 personal fees from Gilead and personal fees from ViiV outside the submitted work; Dr. Mayer  
7 reports grants from NHLBI during the conduct of the study; Dr. Saag reports grants from NIAID  
8 / NIH during the conduct of the study, grants from Gilead, Merck, and ViiV Healthcare outside  
9 the submitted work; Dr. Kitahata reports grants from NHLBI during the conduct of the study; Dr.  
10 Heckbert reports grants from NIH during the conduct of the study; Dr. Delaney reports grants  
11 from NHLBI during the conduct of the study.

### 13 **Contributions:**

14 Dr. Harding, has conducted all analyses, contributed to  
15 methodologic approach, and written the manuscript. In addition,  
16 Ms. Whitney and Ms. Nance contributed to data preparation and  
17 analysis, Dr. Delaney contributed to the analysis, Drs. Heckbert, Crane and Delaney contributed  
18 to conception and design of the work, Drs. Crane, Burkholder, Moore, Mathews, Eron,  
19 Rodriguez, Mayer, Saag and Kitahata contributed to data collection and all authors contributed to  
20 the interpretation of data and critically revising the manuscript for important intellectual content.

### 22 **Transparency declaration:**

23 Dr. Harding affirms that the manuscript is an honest, accurate, and transparent account of the  
24 study being reported; that no important aspects of the study have been omitted; and that any  
25 discrepancies from the study as planned (and, if relevant, registered) have been explained.

### 27 **Ethical approval:**

28 Informed consent was obtained from all participants and institutional review boards at each site  
29 approved CNICS protocols for patient protection and provided general approval for secondary  
30 data analysis.

### 32 **Funding:**

33 This project was funded by R01HL126538-01A1/National Heart, Lung and Blood Institute. They  
34 provided an unrestricted grant and we are completely independent from the study sponsors.  
35 Additional support came from the National Institute of Allergy and Infectious Diseases (NIAID)  
36 at the National Institutes of Health [CNICS R24 AI067039, UW CFAR NIAID Grant P30  
37 AI027757; UNC CFAR grant P30 AI50410, JHU CFAR grant P30 AI094189, and UAB CFAR  
38 grant P30 AI027767]. Dr. Harding is supported by a National Heart, Lung and Blood Institute  
39 grant T32HL007828.

### 41 **Data sharing:**

42 The Centers for AIDS research (CFAR) Network of Integrated Clinical Systems (CNICS) data  
43 may be accessed with an approved concept proposal. Instructions for data access and concept  
44 proposal forms may be found at <https://www.uab.edu/cnics/submit-proposal>.

### 46 **Dissemination declaration:**

47 Dissemination of the study findings are not applicable to participants or patient organizations.

1  
2  
3  
4  
5  
6  
7  
8  
9  
10  
11  
12  
13  
14  
15  
16  
17  
18  
19  
20  
21  
22  
23  
24  
25  
26  
27  
28  
29  
30  
31  
32  
33  
34  
35  
36  
37  
38  
39  
40  
41  
42  
43  
44  
45  
46  
47  
48  
49  
50  
51  
52  
53  
54  
55  
56  
57  
58  
59  
60

**Abstract:** (276 words)

OBJECTIVES: Anaemia is common among people living with HIV (PLWH) and has been associated with certain, often older, antiretroviral medications. Information on current antiretroviral therapy (ART) and anaemia is limited. The objectives were to compare associations between anaemia incidence or haemoglobin change with core ART classes in the current ART era.

DESIGN: Retrospective cohort study.

SETTING: U.S.-based prospective clinical cohort of PLWH aged 18 and above receiving care at 8 sites between 1/2010-3/2018.

PARTICIPANTS: 16,505 PLWH were included in this study.

MAIN OUTCOME MEASURES: Anaemia risk and haemoglobin change were estimated among PLWH for person-time on a protease inhibitor (PI) or an integrase strand transfer inhibitor (INSTI)-based regimen, relative to a non-nucleoside reverse transcriptase inhibitor (NNRTI)-based reference. We also examined PLWH on regimens containing multiple core classes. Cox proportional hazards regression analyses were conducted to measure associations between time-updated ART classes and incident anaemia or severe anaemia. Linear mixed effects models were used to examine relationships between ART classes and haemoglobin change.

RESULTS: During a median of 4.9 years of follow-up, 1,040 developed anaemia and 488 developed severe anaemia. Compared to NNRTI use, INSTI-based regimens were associated with an increased risk of anaemia (adjusted hazard ratio [aHR] 1.26, 95% confidence interval [CI] 1.00-1.58) and severe anaemia (aHR 1.51, 95%CI 1.07-2.11), and a decrease in haemoglobin level. Time on multiple core classes was also associated with increased anaemia risk (aHR 1.39, 95%CI 1.13-1.70) and severe anaemia risk (aHR 1.30, 95%CI 0.95-1.78), while no associations were found for PI use.

CONCLUSION: These findings suggest INSTI use may increase the risk of anaemia. If confirmed, screening for anaemia development in users of INSTIs may be beneficial. Further research into underlying mechanisms is warranted.

#### Strengths and limitations of this study:

- This study utilized a large and geographically diverse population of PLWH in care across the U.S.



- 1 • This study leveraged comprehensive clinical data, including information on diagnoses,  
2 medication use, laboratory test results, demographic information, and medical history.
- 3 • This study investigated associations between specific types of ART core regimens and  
4 anaemia risk.
- 5 • This observational study is subject to residual confounding.
- 6 • This study focused on anaemia assessed from haemoglobin lab values taken at regular  
7 medical care visits without excluding participants with conditions strongly associated  
8 with haemoglobin level through mechanisms unrelated to HIV infection.

## 12 Introduction:

13 Anaemia and severe anaemia are common among people living  
14 with HIV (PLWH) [1]. The prevalence of anaemia is elevated in  
15 PLWH compared to the general population. One study reported that  
16 among non-pregnant American women living with HIV, the  
17 prevalence of anaemia was 28.1% compared to 15.1% among women  
18 without HIV [2]. Estimates vary by age, sex, HIV disease stage,  
19 use of antiretroviral therapy (ART) and injection drug use  
20 status [1, 3]. Among PLWH, associations have been found between  
21 anaemia and mortality [4-9], health-related quality-of-life  
22 [1], morbidity, dementia [10], and ART failure [11]. In  
23 addition, anaemia is an independent prognostic indicator  
24 associated with HIV disease progression [1, 12, 13], including  
25 development of AIDS [7].

26 Research shows that ART impacts anaemia risk among PLWH. In  
27 the early treatment era, use of zidovudine (AZT) was a cause of  
28 bone marrow suppression leading to anaemia [14]. However, in  
29 recent years, AZT use has decreased substantially as other,  
30 better tolerated ART medications have become available. Despite  
31 the impact of specific agents such as AZT, ART use in general is  
32 associated with reduced anaemia incidence [15, 16], likely due  
33 to inhibition of HIV disease progression [17]. Current ART  
34 regimens typically include a pair of nucleoside reverse  
35 transcriptase inhibitors (NRTIs) as a backbone plus a core  
36 agent. Common core classes include non-nucleoside reverse-  
37 transcriptase inhibitors (NNRTIs), integrase strand transfer  
38 inhibitors (INSTIs), and protease inhibitors (PIs). While ART  
39 use overall reduces anaemia, little is known about whether  
40 anaemia risk differs between commonly used ART classes in the  
41 current treatment era, particularly the newer INSTI class. From  
42 clinical safety data of trials, 36-49% of participants using PIs  
43 had haemoglobin (Hb) levels <10g/dL, indicating anaemia [18],

1 and in a randomized controlled trial, two participants  
2 discontinued INSTI use due to anaemia adverse events [19].  
3 However, many studies included few participants or were mostly  
4 from an earlier ART era when older ART medications were  
5 predominantly used or from trials that may be less generalizable  
6 to the diverse population of PLWH in clinical care. The  
7 objective of this study was to compare rates of anaemia and  
8 severe anaemia development as well as changes in Hb over time  
9 based on classes of ART used in the current treatment era.

## 11 **Methods:**

### 12 Overview and setting:

13 The present study included PLWH in care in the Centers for  
14 AIDS Research (CFAR) Network of Integrated Clinical Systems  
15 (CNICS) cohort during the period of January 1, 2010 to March 31,  
16 2018 (the date through which each site had complete data  
17 [administrative censor date] varied somewhat, median date:  
18 October 31, 2017). The CNICS cohort has been described in detail  
19 elsewhere [20]. Briefly, CNICS is a dynamic prospective clinical  
20 cohort of >32,000 adult PLWH receiving care at eight  
21 participating sites across the U.S. Comprehensive clinical data,  
22 including diagnoses, ART and other medications, laboratory test  
23 results, demographic information, and historical information,  
24 including ART use before enrollment, is collected through  
25 electronic medical records and other institutional data systems  
26 at each site and harmonized in the CNICS data repository.  
27 Medication data including ART use are entered into the  
28 electronic medical records by clinicians or prescription  
29 fill/refill data are uploaded directly from pharmacy systems and  
30 verified through medical record review. Participants entered the  
31 current study on January 1, 2010 or the earliest date after  
32 January 1, 2010 that they met the following enrollment criteria  
33 (cohort entry date): a) enrollment in CNICS for  $\geq 6$  months to  
34 allow time for covariate ascertainment, and b) use of an ART  
35 regimen containing a backbone of 2 NRTIs plus a PI, NNRTI, or  
36 INSTI. In addition, all participants were required to have at  
37 least 2 available haemoglobin lab values during study follow-up.  
38 Figure 1 shows inclusion criteria and exclusions made. Informed  
39 consent was obtained from all participants and institutional  
40 review boards at each site approved CNICS protocols.

### 42 Exposure:

43 The exposure of interest was the ART core drug class  
44 (NNRTI, INSTI or PI) prescribed as part of an ART regimen (a  
45 backbone of two NRTIs plus a core drug). Participants switching  
46 to different core drugs within the same class were considered to  
47 be continually exposed to the same core drug class. Individuals

1 with a gap of 6 or more months in use of the ART core drug  
2 classes of interest were censored at the start of the gap and  
3 did not re-enter the study.

4 Person-time on INSTI or PI-based regimens was compared to  
5 the NNRTI reference. In addition, some PLWH in this cohort had  
6 prescriptions for multiple core classes simultaneously.  
7 Participants with regimens containing more than 1 core class  
8 were categorized separately in analyses as users of "multiple  
9 core classes". Boosting agents (e.g. boosted ritonavir, or  
10 cobicistat) were not considered a 2<sup>nd</sup> core agent.

#### 11 Outcome ascertainment:

12 Hb levels, expressed in grams per deciliter (g/dL), were  
13 ascertained using inpatient and outpatient laboratory data  
14 obtained as part of clinical care. Outcomes included incident  
15 anaemia (first post-baseline Hb measure below 10 g/dL), incident  
16 severe anaemia (first post-baseline Hb measure below 7.5 g/dL)  
17 [21] and changes in Hb level. Another outcome, chronic anaemia,  
18 defined as anaemia lasting for  $\geq 6$  months, was also examined.  
19 Chronic anaemia was defined as post-baseline Hb lab results on  
20 two separate occasions at least 6 months apart which were  
21 consistently in the anemic range without any Hb values above the  
22 anaemia range during this 6-month period.

#### 23 Participant characteristics:

24 Characteristics that were analyzed as confounders of the  
25 association between ART core drugs and incident anaemia, severe  
26 anaemia or change in Hb over time included: age, sex,  
27 race/ethnicity, CNICS site, hepatitis C virus (HCV) coinfection  
28 defined as a detectable HCV RNA level or HCV genotype or HCV  
29 antibody, kidney function measured using estimated glomerular  
30 filtration rate (eGFR, categorized as  $<30$ ,  $30-59$ , or  $\geq 60$   
31 mL/minute/1.73 m<sup>2</sup>) [22], CD4 count (categorized as  $\geq 500$ ,  $350-499$ ,  
32  $200-399$ ,  $100-199$  or  $<100$  cells/mm<sup>3</sup>), viral load (VL, assessed as  
33  $\log_{10}(\text{VL}+1)$ ), baseline Hb, and time in care at CNICS sites,  
34 defined as time from cohort entry date until the last available  
35 CNICS activity: either last lab date or last visit. HCV, eGFR,  
36 CD4 count and VL were assessed as part of clinical care visits  
37 and were time-updated as repeated measures occurred. All  
38 covariates were selected *a priori*, based on review of the  
39 literature and clinical knowledge. In addition, assessment of  
40 self-reported ART adherence was available for a subset of ~55%  
41 of the study population who were in care after each individual  
42 site initiated a clinical assessment of patient reported  
43 outcomes, including adherence [23].

#### 44 Statistical analysis:

1  
2  
3 1 Baseline characteristics are presented for all participants  
4 2 at the cohort entry date. Median and interquartile range (IQR)  
5 3 are displayed for continuous variables and frequencies and  
6 4 proportions are displayed for categorical variables.

8 5 Two multivariable Cox proportional hazards regression  
9 6 analyses were conducted, one among the subset of PLWH who were  
10 7 anaemia-free at baseline to determine associations between time-  
11 8 updated NNRTI, PI, and INSTI use and development of anaemia, and  
12 9 another among the subset of participants who were free of severe  
13 10 anaemia at baseline to determine associations between time-  
14 11 updated NNRTI, PI, and INSTI use and development of severe  
15 12 anaemia.

17 13 Participants were censored at a) the time they developed  
18 14 the outcome of interest, b) at the time of last activity in  
19 15 CNICS, c) at the time of death, d) at the date of administrative  
20 16 censoring at each site or e) at the time they no longer were  
21 17 prescribed one of the ART core classes of interest, whichever  
22 18 came first. The timescale for the models was time since cohort  
23 19 entry. Complete case analysis methods were used (<2% had missing  
24 20 data).

26 21 In a sensitivity analysis, we examined ART-naïve PLWH who  
27 22 initiated a regimen including one of the core ART classes of  
28 23 interest during study follow-up. Follow-up in this analysis  
29 24 began when a person began their initial ART regimen and extended  
30 25 until the earliest time of anaemia occurrence, last activity in  
31 26 CNICS, time of death, administrative censoring, or at the time  
32 27 their initial regimen ended. PI or INSTI use were compared to  
33 28 the reference, NNRTI use. We also examined the change in Hb over  
34 29 time using mixed models among this ART-naïve population. We also  
35 30 conducted a sensitivity analysis including baseline NRTI  
36 31 backbone adjustment for abacavir versus tenofovir in an analysis  
37 32 with incident anemia.

39 33 Linear mixed effects models with random slopes for time  
40 34 were used to examine the association of ART core classes with Hb  
41 35 levels among all PLWH after adjustment for the same  
42 36 characteristics as in the incident anaemia and severe anaemia  
43 37 analyses. Mixed-effects models utilize random slopes and  
44 38 intercepts at the participant level to handle irregular patterns  
45 39 of repeated measures over follow-up [24]. All analyses were  
46 40 performed using Stata version 14.2.

#### 42 Patient and public involvement:

43 43 There was no patient or public participation in the present  
44 44 study.

#### 46 **Results:**

47 47 In total, 16,505 PLWH met inclusion criteria and were

1 included in these analyses (Figure 1). Participants had an  
2 average of 11 outpatient Hb values measured during a median  
3 follow-up of 4.9 (IQR 3.0-7.2) years. A total of 12,626 (76%)  
4 were free of anaemia at baseline, and 15,357 (93%) were free of  
5 severe anaemia at baseline. Table 1 provides baseline  
6 characteristics for study participants in the analyses of  
7 incident anaemia and incident severe anaemia. Overall, the mean  
8 age of study participants was 46 years at cohort entry, 20% were  
9 female, and 19% were co-infected with HCV. At baseline, 18% were  
10 prescribed regimens with an NNRTI, 53% with a PI, 14% an INSTI,  
11 and 16% regimens with multiple cores. INSTIs were increasingly  
12 used over the last few years of the study period (Figure 2), and  
13 among those simultaneously prescribed multiple core medications,  
14 the proportion comprised of INSTI plus another core class  
15 increased as study years progressed. Zidovudine was used by 4%  
16 of participants during follow-up.

17 The overall incidence of anaemia was 2.1/100 person-years  
18 and the overall incidence of severe anaemia was 0.8/100 person-  
19 years. The unadjusted incidence rates of anaemia and severe  
20 anaemia based on ART core class are provided in Table 2. In  
21 adjusted analyses, INSTI use was associated with an increased  
22 risk of anaemia (aHR 1.26, 95%CI 1.00-1.58) compared to NNRTIs  
23 (Table 3). Use of multiple core classes together was also  
24 associated with an increased risk of anaemia (aHR 1.39, 95%CI  
25 1.13-1.70) while no associations were found between PI use and  
26 anaemia (aHR of 1.09, 95%CI 0.90-1.32). In adjusted analyses  
27 restricted to participants free of severe anaemia at baseline  
28 (Table 3), INSTI use was associated with an increased risk of  
29 severe anaemia (aHR 1.51, 95%CI 1.07-2.11) compared to NNRTI  
30 use. Although the HR appeared elevated, there was no association  
31 between time on multiple ART core classes and an increased risk  
32 of severe anaemia (aHR 1.30 (0.95-1.78), and no association was  
33 found for PIs (aHR 1.09 (0.81-1.47)). Among the 12,626 PLWH who  
34 were free of anaemia at baseline, 225 developed chronic anaemia  
35 (lasting for  $\geq 6$  months), during follow-up. For chronic anaemia,  
36 results were similar to those in the primary analysis. Relative  
37 to NNRTI use, person-time on multiple core classes was  
38 associated with an aHR for chronic anaemia of 2.21 (95%CI 0.94-  
39 5.18), person-time on an INSTI with an aHR of 1.90 (95%CI 0.76-  
40 4.64) and person-time on a PI with an aHR of 1.27 (95%CI 0.54-  
41 3.04).

42 Average Hb levels remained steady during follow-up; the  
43 mean level was 14.1 g/dL (IQR 12.7-15.1) at baseline and 14.0  
44 g/dL (IQR 12.6-15.2) at the last available measurement per  
45 person. Relative to NNRTI use, a decrease in Hb level over time  
46 was associated with both INSTI use (-0.06 g/dL per year, 95%CI -  
47 0.10, -0.03) and use of multiple core classes (-0.14, 95%CI -

1 0.18, -0.11). No association was found for PI use (-0.01, 95%CI  
2 -0.04, 0.03). (Table 4).

3 The sensitivity analysis restricted to ART-naïve  
4 participants included 6,426 PLWH who were free of prevalent  
5 anaemia at baseline, of whom 378 developed anaemia. Compared to  
6 NNRTI initiators, those initiating a PI had an aHR of 0.69  
7 (0.45-1.06) while those initiating an INSTI had an aHR of 1.10  
8 (95%CI 0.84-1.44) (Supplemental Table 1). The mixed model  
9 examining change in Hb over time among ART-naïve PLWH initiating  
10 one of the ART core classes of interest included 7,264  
11 participants. Compared to NNRTI initiators, a decrease in Hb was  
12 found for PI use (-0.08g/dL per year, 95%CI -0.16, -0.01), while  
13 INSTI use was associated with a larger decrease in Hb level over  
14 time (-0.15g/dL per year, 95%CI -0.22, -0.09) (Supplemental  
15 Table 2). Finally, results from the sensitivity analysis including baseline NRTI backbone  
16 adjustment for abacavir were essentially unchanged (e.g. the abacavir backbone aHR for use of  
17 an INSTI-based regimen was 1.27 (95%CI 1.01-1.60) for incident anaemia compared to the  
18 findings from the primary analysis of an aHR of 1.26 (95%CI 1.00-1.58) (data not shown).

## 20 Discussion:

21 In this study of 16,505 PLWH in care within the United  
22 States in the current treatment era (2010 and after), we  
23 observed that INSTI use, and time on multiple core ART classes,  
24 were associated with decreases in Hb levels during follow-up  
25 compared to using NNRTI-based regimens. We found that INSTI use  
26 was associated with an increased risk of anaemia (aHR 1.26, 95%CI 1.00-  
27 1.58) and severe anaemia (1.51, 95%CI 1.07-2.11) as well as a decrease in Hb levels over  
28 time. Furthermore, the naïve user analysis indicated similar  
29 findings despite a smaller sample size. These findings could  
30 have implications for the treatment approach that should be used  
31 in people with risk factors for anaemia.

32 This study's strengths include its large and geographically  
33 diverse study population and longitudinal data structure.  
34 Nevertheless, there are limitations of this study to consider,  
35 including the observational nature of the data, which may be  
36 subject to residual confounding including confounding by  
37 indication [25]. However, anaemia is not a recognized adverse  
38 effect of NNRTIs, PIs, or INSTIs. Thus, it is unlikely that ART  
39 core class was selected based on prescriber concern about  
40 anaemia risk. Additionally, we did not exclude participants with  
41 conditions strongly associated with anaemia or Hb level,  
42 including those on dialysis, receiving erythropoietin, or with  
43 severe bleeding, which likely caused some of the anaemia cases  
44 in this analysis. However, in the sensitivity analysis focusing  
45 on factors associated with chronic anaemia (less likely due to  
46 bleeding), findings for INSTI vs. NNRTI core regimens were  
47 similar to those including all PLWH who became anemic.

1  
2  
3 1 Information on ART medication use was from prescription data  
4 2 which does not necessarily indicate medications were taken,  
5 3 although self-reported adherence was high (~98%) in the subset  
6 4 for whom adherence information was available. CNICS participants  
7 5 who provided adherence information have been shown to be  
8 6 representative of the overall population of PLWH in CNICS [23,  
9 7 26]. Finally, the fact that this study was conducted among PLWH  
10 8 in care in the U.S. who are on ART may limit the  
11 9 generalizability of findings to PLWH who live outside of the  
12 10 U.S.

11 There have been few epidemiologic studies of anaemia risk among users of newer ART  
12 core regimens. From clinical safety data reported from multiple trials, approximately 36-49%  
13 of participants using PIs had Hb levels <10g/dL, indicating  
14 anaemia [18], and in another trial, two participants  
15 discontinued INSTI use due to anaemia adverse events [19],  
16 however the strict inclusion criteria applied in clinical trials  
17 makes it difficult to generalize these findings to more diverse  
18 populations of PLWH in clinical care. Another study, conducted  
19 during the newer-era of HIV treatment with drugs other than AZT,  
20 (during 2008-2012) presented findings for AZT versus non-AZT  
21 regimens, finding an increased risk of anaemia among AZT  
22 compared to non-AZT regimens (HR=2.84, 95%CI 1.52-5.31) [27].  
23 However, anaemia risk was not analyzed separately for the use of  
24 specific classes of ART, resulting in the inability of  
25 comparison to the present study's findings and a lack of  
26 generalizability to PLWH who are treated with newer ART core  
27 agents.

28 It is possible that PLWH in our study whose HIV is  
29 progressing due to resistance or other complications may get  
30 switched to an INSTI. This, in addition to prior knowledge that  
31 poorly controlled HIV parameters are on their own a risk factor  
32 for anaemia [5, 28, 29], could result in confounding by  
33 indication. However, the switch to INSTI core regimens since  
34 their approval in 2007 has been widespread in this population  
35 (Figure 2) and INSTIs are recommended for use as initial  
36 regimens [30]. In addition, we rigorously controlled for many of  
37 the important HIV-related factors that correspond to poorly-  
38 controlled HIV, and our sensitivity analysis examining new users  
39 of ART medications failed to reinforce the notion that an  
40 increased risk of anaemia among INSTI core regimen users could  
41 be entirely explained by sicker participants getting switched to  
42 these therapies.

43 PLWH on multiple core classes were in a different category  
44 in our analyses. There are several reasons PLWH may be  
45 prescribed multiple core classes. For example, sometimes PLWH  
46 are prescribed multiple core classes to ensure they receive a  
47 complete regimen while awaiting approval for specific agents

1 from their insurance company. However, the primary concern was  
2 that they were receiving multiple core classes due to provider  
3 concerns such as prior failed regimens which may also increase  
4 their risk of anaemia.

5 In conclusion, in this large, diverse, multicenter cohort  
6 of PLWH, we found that INSTI use and time on multiple ART core  
7 classes were associated with progression to anaemia and a lower  
8 Hb level. INSTI use was also associated with severe anaemia  
9 risk. Our findings suggest that careful selection of ART regimen  
10 could mitigate anaemia development, although this anaemia risk  
11 needs to be balanced with the possibility of improvement in  
12 overall HIV care [31]. Further research is needed to replicate  
13 the finding of INSTI core regimen use and anaemia risk and to  
14 understand the underlying mechanisms. If confirmed, screening  
15 for anaemia development in users of INSTIs may be beneficial.

### 16 17 **Figure Legends**

18  
19 Figure 1: Flow chart for inclusion/exclusion criteria for 22,027  
20 PLWH in care at CNICS after 1/2010. Exclusions were made for  
21 those not exposed to any of the ART core classes, those with  
22 fewer than 2 haemoglobin levels, and those missing baseline  
23 covariates, resulting in 16,505 PLWH who were included in these  
24 analyses.

25 Figure 2. Proportion of study population (N=16,505) using  
26 various ART classes during complete years of study follow-up.  
27 This figure shows the trends in use of the ART core classes  
28 during 2010-2017.



Table 1. Baseline characteristics of PLWH in CNICS who were receiving an ART core agent of interest (N=16,505)<sup>a</sup>

|                                                   | Incident anaemia analysis<br>(n=12,626) |                                 | Incident severe anaemia analysis<br>(n=15,357) |                                      |
|---------------------------------------------------|-----------------------------------------|---------------------------------|------------------------------------------------|--------------------------------------|
|                                                   | Do not develop<br>anaemia<br>(n=11,586) | Develop<br>anaemia<br>(n=1,040) | Do not develop<br>severe anaemia<br>(n=14,896) | Develop severe<br>anaemia<br>(n=488) |
| Age (median, IQR)                                 | 45 (37, 51)                             | 47 (40, 54)                     | 45 (37-52)                                     | 46 (39, 54)                          |
| Female                                            | 1574 (14)                               | 276 (27)                        | 2681 (18)                                      | 158 (32)                             |
| Race/ethnicity                                    |                                         |                                 |                                                |                                      |
| White                                             | 5782 (50)                               | 396 (38)                        | 6840 (46)                                      | 157 (32)                             |
| Black                                             | 3720 (32)                               | 499 (48)                        | 5442 (37)                                      | 254 (52)                             |
| Hispanic                                          | 1537 (13)                               | 106 (10)                        | 1920 (13)                                      | 58 (12)                              |
| Other/missing                                     | 547 (5)                                 | 39 (4)                          | 667 (4)                                        | 19 (4)                               |
| Years in CNICS at cohort<br>entry a (median, IQR) | 5.2 (2.3, 8.8)                          | 5.8 (2.8, 6.9)                  | 5.5 (2.4, 9.0)                                 | 5.56 (2.8, 9.1)                      |
| Viral load $\geq$ 400<br>copies/ml                | 2441 (21)                               | 283 (27)                        | 3259 (22)                                      | 172 (35)                             |
| CD4 count (cells/mm <sup>3</sup> )                |                                         |                                 |                                                |                                      |
| <100                                              | 528 (5)                                 | 112 (11)                        | 915 (6)                                        | 90 (18)                              |
| 100-199                                           | 870 (8)                                 | 96 (9)                          | 1256 (8)                                       | 63 (13)                              |
| 200-349                                           | 1974 (17)                               | 216 (21)                        | 2675 (18)                                      | 113 (23)                             |
| 350-499                                           | 2497 (21)                               | 226 (22)                        | 3160 (21)                                      | 80 (16)                              |
| $\geq$ 500                                        | 5717 (49)                               | 390 (38)                        | 6863 (46)                                      | 142 (29)                             |
| Hepatitis C virus<br>coinfection                  | 1816 (16)                               | 303 (29)                        | 2711 (18)                                      | 139 (28)                             |

|                                                                                        |                   |                   |                   |                   |
|----------------------------------------------------------------------------------------|-------------------|-------------------|-------------------|-------------------|
| <b>Kidney function (eGFR)</b><br>(mL/min/1.73 m <sup>2</sup> )                         |                   |                   |                   |                   |
| <30                                                                                    | 32 (<1)           | 36 (3)            | 142 (1)           | 42 (9)            |
| 30-59                                                                                  | 459 (4)           | 80 (8)            | 731 (5)           | 51 (10)           |
| ≥60                                                                                    | 11095 (96)        | 924 (89)          | 13996 (94)        | 395 (81)          |
| <b>Baseline haemoglobin</b><br>(g/dL) (median, IQR)                                    |                   |                   |                   |                   |
|                                                                                        | 14.5 (13.5, 15.4) | 13.3 (12.2, 14.4) | 14.3 (13.1, 15.2) | 12.4 (10.8, 13.8) |
| <b>BMI (kg/m<sup>2</sup>)</b>                                                          |                   |                   |                   |                   |
| <18.5                                                                                  | 229 (2)           | 36 (4)            | 377 (3)           | 30 (6)            |
| 18.5 to <25.0                                                                          | 4806 (43)         | 426 (42)          | 6120 (43)         | 211 (45)          |
| 25.0 to <30.0                                                                          | 3929 (35)         | 301 (30)          | 4885 (345)        | 117 (25)          |
| ≥30.0                                                                                  | 2142 (19)         | 245 (24)          | 2893 (20)         | 115 (24)          |
| <b>ART core class</b>                                                                  |                   |                   |                   |                   |
| NNRTI                                                                                  | 2109 (18)         | 117 (17)          | 2633 (18)         | 70 (14)           |
| PI                                                                                     | 6135 (53)         | 558 (54)          | 7935 (53)         | 251 (51)          |
| INSTI                                                                                  | 1803 (16)         | 93 (9)            | 2126 (14)         | 46 (9)            |
| Multiple core classes                                                                  | 1539 (13)         | 212 (20)          | 2175 (15)         | 121 (25)          |
| <b>Self-reported adherence</b><br>(on a 100-point scale)<br>(median, IQR) <sup>b</sup> |                   |                   |                   |                   |
|                                                                                        | 98 (93, 100)      | 98 (91-99)        | 98 (92, 100)      | 97 (90-99)        |

<sup>a</sup>Cohort entry date was defined as the earliest date during January 1, 2010- March 31, 2018 that a person had ≥6 months in CNICS and was receiving an ART regimen with a core agent of interest.

<sup>b</sup>For the 55% of the population who reported medication adherence  
Abbreviations: PLWH: people living with HIV, CNICS: Centers for AIDS Research Network of Integrated Clinical Systems, ART: antiretroviral therapy, eGFR: estimated glomerular filtration rate, NNRTI: non-nucleoside reverse transcriptase inhibitor, PI: protease inhibitor, INSTI: integrase strand transfer inhibitor

Table 2. Incidence rate of anaemia (haemoglobin<10 g/dL) and severe anaemia (haemoglobin<7.5 g/dL) by ART core drug class

| ART Regimen           | Follow-up time (person-years) | Events | Rate (per 100 person-years) |
|-----------------------|-------------------------------|--------|-----------------------------|
| <b>Anaemia</b>        |                               |        |                             |
| NNRTI                 | 9,964                         | 150    | 1.50                        |
| PI                    | 24,710                        | 485    | 1.96                        |
| INSTI                 | 7,389                         | 155    | 2.10                        |
| Multiple core classes | 8,172                         | 250    | 3.06                        |
| <b>Severe anaemia</b> |                               |        |                             |
| NNRTI                 | 12,113                        | 57     | 0.47                        |
| PI                    | 31,156                        | 204    | 0.65                        |
| INSTI                 | 9,132                         | 84     | 0.92                        |
| Multiple core classes | 11,258                        | 143    | 1.27                        |

Abbreviations: ART: antiretroviral therapy, NNRTI: non-nucleoside reverse transcriptase inhibitor, PI: protease inhibitor, INSTI: integrase strand transfer inhibitor

1.

1  
2  
3  
4  
5  
6  
7  
8  
9  
10  
11  
12  
13  
14  
15  
16  
17  
18  
19  
20  
21  
22  
23  
24  
25  
26  
27  
28  
29  
30  
31  
32  
33  
34  
35  
36  
37  
38  
39  
40  
41  
42  
43  
44  
45  
46  
47  
48  
49  
50  
51  
52  
53  
54  
55  
56  
57  
58  
59  
60

For peer review only

1  
2  
3  
4 1  
5 2 Table 3. Association of ART core classes with incident anaemia (haemoglobin<10 g/dL),  
6 3 severe anaemia (hemoglobin<7.5 g/dL) or chronic anaemia (>6 months of anaemia)

| ART Regimen           | Hazard Ratio of incident anaemia (n=12,626) |                       | Hazard Ratio of incident severe anaemia (n=15,357) |                       | Hazard Ratio of incident chronic anaemia (n=12,626) |                       |
|-----------------------|---------------------------------------------|-----------------------|----------------------------------------------------|-----------------------|-----------------------------------------------------|-----------------------|
|                       | Unadjusted                                  | Adjusted <sup>a</sup> | Unadjusted                                         | Adjusted <sup>a</sup> | Unadjusted                                          | Adjusted <sup>a</sup> |
| NNRTI (REF)           | 1.00                                        | 1.00                  | 1.00                                               | 1.00                  | 1.00                                                | 1.00                  |
| PI                    | 1.26 (1.05-1.52)                            | 1.09 (0.90, 1.32)     | 1.37 (1.02-1.83)                                   | 1.09 (0.81, 1.47)     | 1.43 (0.61-3.35)                                    | 1.27 (0.54-3.04)      |
| INSTI                 | 1.39 (1.11-1.75)                            | 1.26 (1.00, 1.58)     | 1.96 (1.40-2.75)                                   | 1.51 (1.07, 2.11)     | 2.05 (0.85-4.94)                                    | 1.90 (0.76-4.64)      |
| Multiple core classes | 2.02 (1.65-3.48)                            | 1.39 (1.13, 1.70)     | 2.70 (1.99-3.67)                                   | 1.30 (0.95, 1.78)     | 3.46 (1.51-7.93)                                    | 2.21 (0.94-5.18)      |

4 <sup>a</sup>Adjusted for age, sex, race/ethnicity, CNICS site, Hepatitis C virus status, CD4 count,  
5 viral load, kidney function (eGFR), baseline haemoglobin

6 Abbreviations: ART: antiretroviral therapy, NNRTI: non-nucleoside reverse transcriptase  
7 inhibitor, PI: protease inhibitor, INSTI: integrase strand transfer inhibitor

1 Table 4. Association of ART core classes with change in  
 2 haemoglobin level during follow-up in adjusted analyses (linear  
 3 mixed-effect model); N=16,505

| ART class             | Coefficient <sup>a</sup> | 95% CI       | P-value |
|-----------------------|--------------------------|--------------|---------|
| NNRTI (REF)           |                          |              |         |
| PI                    | -0.01                    | -0.04, 0.03  | 0.675   |
| INSTI                 | -0.06                    | -0.10, -0.03 | <0.001  |
| Multiple core classes | -0.14                    | -0.18, -0.11 | <0.001  |

4 <sup>a</sup>Coefficient is the mean difference per year in Hb (g/dL) for  
 5 each core regimen relative to the NNRTI core regimen, after  
 6 adjustment for site, age, sex, race/ethnicity, hepatitis C virus  
 7 coinfection, CD4 cell count, viral load, eGFR and years in  
 8 study.

9 Abbreviations: ART: antiretroviral therapy, NNRTI: non-  
 10 nucleoside reverse-transcriptase inhibitor, PI: protease  
 11 inhibitor, INSTI: integrase strand transfer inhibitor

1  
2  
3 1  
4  
5 2  
6  
7 3  
8  
9 4  
10 5 **References :**

- 11 6 1. Redig, A.J. and N. Berliner, *Pathogenesis and clinical implications of HIV-related anemia in 2013*. Hematology Am Soc Hematol Educ Program, 2013. **2013**: p. 377-81.
- 12 7 2. Semba, R.D., et al., *Prevalence and cumulative incidence of and risk factors for anemia in a multicenter cohort study of human immunodeficiency virus-infected and -uninfected women*. Clin Infect Dis, 2002. **34**(2): p. 260-6.
- 13 8 3. Belperio, P.S. and D.C. Rhew, *Prevalence and outcomes of anemia in individuals with human immunodeficiency virus: a systematic review of the literature*. Am J Med, 2004. **116 Suppl 7A**: p. 27S-43S.
- 14 9 4. Sullivan, P.S., et al., *Epidemiology of anemia in human immunodeficiency virus (HIV)-infected persons: results from the multistate adult and adolescent spectrum of HIV disease surveillance project*. Blood, 1998. **91**(1): p. 301-8.
- 15 10 5. Mocroft, A., et al., *Anaemia is an independent predictive marker for clinical prognosis in HIV-infected patients from across Europe. EuroSIDA study group*. AIDS, 1999. **13**(8): p. 943-50.
- 16 11 6. Moore, R.D., J.C. Keruly, and R.E. Chaisson, *Anemia and survival in HIV infection*. J Acquir Immune Defic Syndr Hum Retrovirol, 1998. **19**(1): p. 29-33.
- 17 12 7. Graham, N.M., et al., *CD4+ lymphocyte response to zidovudine as a predictor of AIDS-free time and survival time*. J Acquir Immune Defic Syndr, 1993. **6**(11): p. 1258-66.
- 18 13 8. Mocroft, A., et al., *Haemoglobin and anaemia in the SMART study*. Antivir Ther, 2011. **16**(3): p. 329-37.
- 19 14 9. Harris, R.J., et al., *Prognostic importance of anaemia in HIV type-1-infected patients starting antiretroviral therapy: collaborative analysis of prospective cohort studies*. Antivir Ther, 2008. **13**(8): p. 959-67.
- 20 15 10. McArthur, J.C., et al., *Dementia in AIDS patients: incidence and risk factors. Multicenter AIDS Cohort Study*. Neurology, 1993. **43**(11): p. 2245-52.
- 21 16 11. Anude, C.J., et al., *Immuno-virologic outcomes and immuno-virologic discordance among adults alive and on anti-retroviral therapy at 12 months in Nigeria*. BMC Infect Dis, 2013. **13**: p. 113.
- 22 17 12. Kowalska, J.D., et al., *Current hemoglobin levels are more predictive of disease progression than hemoglobin measured at baseline in patients receiving antiretroviral treatment for HIV type 1 infection*. AIDS Res Hum Retroviruses, 2007. **23**(10): p. 1183-8.
- 23 18 13. Lundgren, J.D., et al., *A clinically prognostic scoring system for patients receiving highly active antiretroviral therapy: results from the EuroSIDA study*. J Infect Dis, 2002. **185**(2): p. 178-87.
- 24 19 14. Zauli, G., et al., *tat protein stimulates production of transforming growth factor-beta 1 by marrow macrophages: a potential mechanism for human immunodeficiency virus-1-induced hematopoietic suppression*. Blood, 1992. **80**(12): p. 3036-43.
- 25 20 15. Moore, R.D. and D. Forney, *Anemia in HIV-infected patients receiving highly active antiretroviral therapy*. J Acquir Immune Defic Syndr, 2002. **29**(1): p. 54-7.

- 1  
2  
3 1 16. Kerkhoff, A.D., et al., *Resolution of anaemia in a cohort of HIV-infected patients with a*  
4 2 *high prevalence and incidence of tuberculosis receiving antiretroviral therapy in South*  
5 3 *Africa*. BMC Infect Dis, 2014. **14**: p. 3860.
- 6 4 17. Volberding, P.A., et al., *Anemia in HIV infection: clinical impact and evidence-based*  
7 5 *management strategies*. Clin Infect Dis, 2004. **38**(10): p. 1454-63.
- 8 6 18. Harrison, S.A., *Management of anemia in patients receiving protease inhibitors*.  
9 7 Gastroenterol Hepatol (N Y), 2012. **8**(4): p. 254-6.
- 10 8 19. Mullick C MD, Belew Y, *Clinical Review Dolutegravir NDA 204790 SN 00. 2012*.
- 11 9 20. Kitahata, M.M., et al., *Cohort profile: the Centers for AIDS Research Network of*  
12 10 *Integrated Clinical Systems*. Int J Epidemiol, 2008. **37**(5): p. 948-55.
- 13 11 21. *Division of AIDS. Table for Grading the Severity of Adult and Pediatric Adverse Events*.  
14 12 <http://rcc.tech-res.com/safetyandpharmacovigilance/>. Accessed 3/1/2014.
- 15 13 22. Levey, A.S., et al., *A new equation to estimate glomerular filtration rate*. Ann Intern  
16 14 Med, 2009. **150**(9): p. 604-12.
- 17 15 23. Fredericksen, R., et al., *Integrating a web-based, patient-administered assessment into*  
18 16 *primary care for HIV-infected adults*. J AIDS HIV Res, 2012. **4**(2): p. 47-55.
- 19 17 24. Laird, N.M. and J.H. Ware, *Random-effects models for longitudinal data*. Biometrics,  
20 18 1982. **38**(4): p. 963-74.
- 21 19 25. Miettinen, O.S., *The need for randomization in the study of intended effects*. Stat Med,  
22 20 1983. **2**(2): p. 267-71.
- 23 21 26. Crane, H.M., et al., *A Comparison of Adherence Timeframes Using Missed Dose Items*  
24 22 *and Their Associations with Viral Load in Routine Clinical Care: Is Longer Better?*  
25 23 AIDS Behav, 2017. **21**(2): p. 470-480.
- 26 24 27. Wolde HM, L.W., YMelaku YA, Girmay KH. , *Incidence and Risk Factors of Anemia*  
27 25 *among HIV/AIDS Patients Taking Anti-Retroviral Therapy at Tertiary Hospitals in Addis*  
28 26 *Ababa, Ethiopia: A Retrospective Cohort Study*. Journal of HIV/AIDS and Infectious  
29 27 Diseases, 2013.
- 30 28 28. Levine, A.M., et al., *Prevalence and correlates of anemia in a large cohort of HIV-*  
31 29 *infected women: Women's Interagency HIV Study*. J Acquir Immune Defic Syndr, 2001.  
32 30 **26**(1): p. 28-35.
- 33 31 29. Zhou, J., et al., *Short-term risk of anaemia following initiation of combination*  
34 32 *antiretroviral treatment in HIV-infected patients in countries in sub-Saharan Africa,*  
35 33 *Asia-Pacific, and central and South America*. J Int AIDS Soc, 2012. **15**(1): p. 5.
- 36 34 30. *Panel on Antiretroviral Guidelines for Adults and Adolescents. Guidelines for the Use of*  
37 35 *Antiretroviral Agents in Adults and Adolescents Living with HIV. Department of Health*  
38 36 *and Human Services. Available at [http://www.aidsinfo.nih.gov/ContentFiles/](http://www.aidsinfo.nih.gov/ContentFiles/AdultandAdolescentGL.pdf)*  
39 37 *AdultandAdolescentGL.pdf*. Accessed [October, 2018].
- 40 38 31. Nance, R.M., et al., *HIV Viral Suppression Trends Over Time Among HIV-Infected*  
41 39 *Patients Receiving Care in the United States, 1997 to 2015: A Cohort Study*. Ann Intern  
42 40 Med, 2018. **169**(6): p. 376-384.
- 43  
44  
45  
46  
47  
48  
49  
50  
51  
52  
53  
54  
55  
56  
57  
58  
59  
60



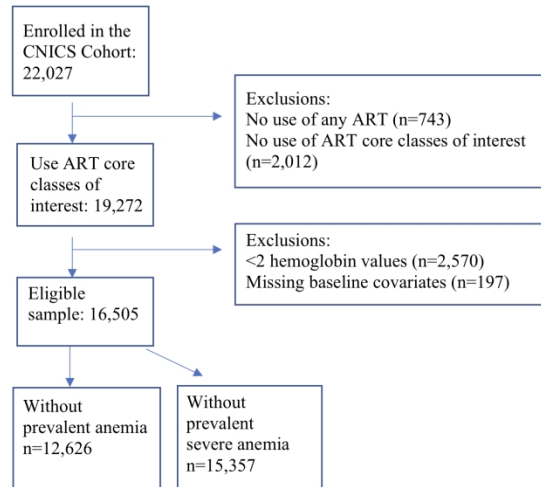

Figure 1: Flow chart for inclusion/exclusion criteria for 22,027 PLWH in care at CNICS after 1/2010. Exclusions were made for those not exposed to any of the ART core classes, those with fewer than 2 haemoglobin levels, and those missing baseline covariates, resulting in 16,505 PLWH who were included in these analyses.

215x279mm (300 x 300 DPI)

1  
2  
3  
4  
5  
6  
7  
8  
9  
10  
11  
12  
13  
14  
15  
16  
17  
18  
19  
20  
21  
22  
23  
24  
25  
26  
27  
28  
29  
30  
31  
32  
33  
34  
35  
36  
37  
38  
39  
40  
41  
42  
43  
44  
45  
46  
47  
48  
49  
50  
51  
52  
53  
54  
55  
56  
57  
58  
59  
60

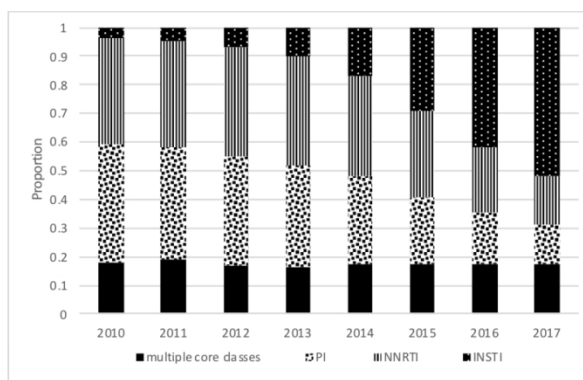

Figure 2. Proportion of study population (N=16,505) using various ART classes during complete years of study follow-up. This figure shows the trends in use of the ART core classes during 2010-2017.

215x279mm (300 x 300 DPI)

Supplemental Table 1: Association of ART classes with incident anaemia among naïve users

| ART class   | Hazard ratio of incident anaemia (n=6,426) |                       |
|-------------|--------------------------------------------|-----------------------|
|             | Unadjusted                                 | Adjusted <sup>a</sup> |
| NNRTI (REF) | 1.00                                       | 1.00                  |
| PI          | 0.92 (0.67-1.247)                          | 0.6978 (0.4556-1.068) |
| INSTI       | 1.73 (1.39-2.15)                           | 1.105 (0.8492, 1.445) |

<sup>a</sup>Adjusted for age, sex, race/ethnicity, CNICS site, Hepatitis C virus status, CD4 count, viral load, kidney function (eGFR) and baseline haemoglobin

Abbreviations: ART: antiretroviral therapy, NNRTI: non-nucleoside reverse-transcriptase inhibitor, PI: protease inhibitor, INSTI: integrase strand transfer inhibitor

Supplemental Table 2. Association of ART classes with change in haemoglobin level during follow-up in adjusted analyses among naïve users (linear mixed-effect model); N=7,264

| ART class   | Coefficient <sup>a</sup> | 95% CI       | P-value |
|-------------|--------------------------|--------------|---------|
| NNRTI (REF) |                          |              |         |
| PI          | -0.08                    | -0.16, -0.01 | 0.031   |
| INSTI       | -0.15                    | -0.22, -0.09 | <0.001  |

<sup>a</sup>Coefficient is the mean difference per year in Hb (g/dL) for each core regimen relative to the NNRTI core regimen, after adjustment for site, age, sex, race/ethnicity, hepatitis C virus coinfection, CD4 cell count, viral load, eGFR and years in study. Abbreviations: ART: antiretroviral therapy, NNRTI: non-nucleoside reverse-transcriptase inhibitor, PI: protease inhibitor, INSTI: integrase strand transfer inhibitor

STROBE Statement—Checklist of items that should be included in reports of *cohort studies*

|                                                         | Item No | Recommendation                                                                                                                                                                                                                                                                                                         |
|---------------------------------------------------------|---------|------------------------------------------------------------------------------------------------------------------------------------------------------------------------------------------------------------------------------------------------------------------------------------------------------------------------|
| ✓ Title and abstract<br>(page 1-title, page 3 abstract) | 1       | (a) Indicate the study's design with a commonly used term in the title or the abstract<br>(b) Provide in the abstract an informative and balanced summary of what was done and what was found                                                                                                                          |
| <b>Introduction</b>                                     |         |                                                                                                                                                                                                                                                                                                                        |
| ✓ Background/rationale<br>(pages 5, 6)                  | 2       | Explain the scientific background and rationale for the investigation being reported                                                                                                                                                                                                                                   |
| ✓ Objectives<br>(page 6)                                | 3       | State specific objectives, including any prespecified hypotheses                                                                                                                                                                                                                                                       |
| <b>Methods</b>                                          |         |                                                                                                                                                                                                                                                                                                                        |
| ✓ Study design<br>(page 6)                              | 4       | Present key elements of study design early in the paper                                                                                                                                                                                                                                                                |
| ✓ Setting<br>(page 6)                                   | 5       | Describe the setting, locations, and relevant dates, including periods of recruitment, exposure, follow-up, and data collection                                                                                                                                                                                        |
| ✓ Participants<br>(page 6)                              | 6       | (a) Give the eligibility criteria, and the sources and methods of selection of participants. Describe methods of follow-up<br>(b) For matched studies, give matching criteria and number of exposed and unexposed                                                                                                      |
| ✓ Variables<br>(pages 7, 8)                             | 7       | Clearly define all outcomes, exposures, predictors, potential confounders, and effect modifiers. Give diagnostic criteria, if applicable                                                                                                                                                                               |
| ✓ Data sources/<br>measurement<br>(pages 7, 8)          | 8*      | For each variable of interest, give sources of data and details of methods of assessment (measurement). Describe comparability of assessment methods if there is more than one group                                                                                                                                   |
| ✓ Bias<br>(page 9)                                      | 9       | Describe any efforts to address potential sources of bias                                                                                                                                                                                                                                                              |
| ✓ Study size<br>(page 6)                                | 10      | Explain how the study size was arrived at                                                                                                                                                                                                                                                                              |
| ✓ Quantitative variables<br>(pages 7, 8)                | 11      | Explain how quantitative variables were handled in the analyses. If applicable, describe which groupings were chosen and why                                                                                                                                                                                           |
| ✓ Statistical methods<br>(pages 8, 9)                   | 12      | (a) Describe all statistical methods, including those used to control for confounding<br>(b) Describe any methods used to examine subgroups and interactions<br>(c) Explain how missing data were addressed<br>(d) If applicable, explain how loss to follow-up was addressed<br>(e) Describe any sensitivity analyses |
| <b>Results</b>                                          |         |                                                                                                                                                                                                                                                                                                                        |
| ✓ Participants<br>(figure 1, page 9)                    | 13*     | (a) Report numbers of individuals at each stage of study—eg numbers potentially eligible, examined for eligibility, confirmed eligible, included in the study, completing follow-up, and analysed<br>(b) Give reasons for non-participation at each stage<br>(c) Consider use of a flow diagram                        |
| ✓ Descriptive data<br>(pages 9, 10)                     | 14*     | (a) Give characteristics of study participants (eg demographic, clinical, social) and information on exposures and potential confounders<br>(b) Indicate number of participants with missing data for each variable of interest<br>(c) Summarise follow-up time (eg, average and total amount)                         |

|    |                                     |     |                                                                                                                                                                                                              |
|----|-------------------------------------|-----|--------------------------------------------------------------------------------------------------------------------------------------------------------------------------------------------------------------|
| 1  | ✓Outcome data<br>(page 10)          | 15* | Report numbers of outcome events or summary measures over time                                                                                                                                               |
| 2  |                                     |     |                                                                                                                                                                                                              |
| 3  |                                     |     |                                                                                                                                                                                                              |
| 4  | ✓Main results<br>(pages 10, 11)     | 16  | (a) Give unadjusted estimates and, if applicable, confounder-adjusted estimates and their precision (eg, 95% confidence interval). Make clear which confounders were adjusted for and why they were included |
| 5  |                                     |     |                                                                                                                                                                                                              |
| 6  |                                     |     |                                                                                                                                                                                                              |
| 7  |                                     |     | (b) Report category boundaries when continuous variables were categorized                                                                                                                                    |
| 8  |                                     |     |                                                                                                                                                                                                              |
| 9  |                                     |     | (c) If relevant, consider translating estimates of relative risk into absolute risk for a meaningful time period                                                                                             |
| 10 |                                     |     |                                                                                                                                                                                                              |
| 11 | ✓Other analyses<br>(page 11)        | 17  | Report other analyses done—eg analyses of subgroups and interactions, and sensitivity analyses                                                                                                               |
| 12 |                                     |     |                                                                                                                                                                                                              |
| 13 |                                     |     |                                                                                                                                                                                                              |
| 14 | <b>Discussion</b>                   |     |                                                                                                                                                                                                              |
| 15 | ✓Key results<br>(page 11)           | 18  | Summarise key results with reference to study objectives                                                                                                                                                     |
| 16 |                                     |     |                                                                                                                                                                                                              |
| 17 |                                     |     |                                                                                                                                                                                                              |
| 18 | ✓Limitations<br>(page 12)           | 19  | Discuss limitations of the study, taking into account sources of potential bias or imprecision. Discuss both direction and magnitude of any potential bias                                                   |
| 19 |                                     |     |                                                                                                                                                                                                              |
| 20 | ✓Interpretation<br>(page 13)        | 20  | Give a cautious overall interpretation of results considering objectives, limitations, multiplicity of analyses, results from similar studies, and other relevant evidence                                   |
| 21 |                                     |     |                                                                                                                                                                                                              |
| 22 |                                     |     |                                                                                                                                                                                                              |
| 23 | ✓Generalisability<br>(pages 12, 13) | 21  | Discuss the generalisability (external validity) of the study results                                                                                                                                        |
| 24 |                                     |     |                                                                                                                                                                                                              |
| 25 |                                     |     |                                                                                                                                                                                                              |
| 26 | <b>Other information</b>            |     |                                                                                                                                                                                                              |
| 27 | ✓Funding<br>(page 2)                | 22  | Give the source of funding and the role of the funders for the present study and, if applicable, for the original study on which the present article is based                                                |
| 28 |                                     |     |                                                                                                                                                                                                              |
| 29 |                                     |     |                                                                                                                                                                                                              |

\*Give information separately for exposed and unexposed groups.

**Note:** An Explanation and Elaboration article discusses each checklist item and gives methodological background and published examples of transparent reporting. The STROBE checklist is best used in conjunction with this article (freely available on the Web sites of PLoS Medicine at <http://www.plosmedicine.org/>, Annals of Internal Medicine at <http://www.annals.org/>, and Epidemiology at <http://www.epidem.com/>). Information on the STROBE Initiative is available at <http://www.strobe-statement.org>.

# BMJ Open

## A study of antiretroviral drug class and anaemia risk in the current treatment era among people living with HIV in the United States: A clinical cohort study

|                                 |                                                                                                                                                                                                                                                                                                                                                                                                                                                                                                                                                                                                                                                                                                                                                                                                                                                                                                                                                          |
|---------------------------------|----------------------------------------------------------------------------------------------------------------------------------------------------------------------------------------------------------------------------------------------------------------------------------------------------------------------------------------------------------------------------------------------------------------------------------------------------------------------------------------------------------------------------------------------------------------------------------------------------------------------------------------------------------------------------------------------------------------------------------------------------------------------------------------------------------------------------------------------------------------------------------------------------------------------------------------------------------|
| Journal:                        | <i>BMJ Open</i>                                                                                                                                                                                                                                                                                                                                                                                                                                                                                                                                                                                                                                                                                                                                                                                                                                                                                                                                          |
| Manuscript ID                   | bmjopen-2019-031487.R2                                                                                                                                                                                                                                                                                                                                                                                                                                                                                                                                                                                                                                                                                                                                                                                                                                                                                                                                   |
| Article Type:                   | Research                                                                                                                                                                                                                                                                                                                                                                                                                                                                                                                                                                                                                                                                                                                                                                                                                                                                                                                                                 |
| Date Submitted by the Author:   | 09-Jan-2020                                                                                                                                                                                                                                                                                                                                                                                                                                                                                                                                                                                                                                                                                                                                                                                                                                                                                                                                              |
| Complete List of Authors:       | Harding, Barbara; University of Washington, Epidemiology<br>Whitney, Bridget; University of Washington, Epidemiology<br>Nance, Robin; University of Washington, Epidemiology<br>Crane, HM; University of Washington, Medicine<br>Burkholder, Greer; University of Alabama at Birmingham<br>Moore, Richard; Johns Hopkins University School of Medicine, Medicine<br>Mathews, William; University of California, San Diego<br>Eron, Joseph; University of North Carolina at Chapel Hill<br>Hunt, Peter; University of California San Francisco<br>Volberding, Paul ; UCSF, Medicine<br>Rodriguez, Benigno ; Case Western Reserve University<br>Mayer, Kenneth; The Fenway Institute at Fenway Health<br>Saag, Michael ; University of Alabama at Birmingham<br>Kitahata, Mari M. ; University of Washington, Medicine<br>Heckbert, Susan; University of Washington, Epidemiology<br>Delaney, Joseph; University of Washington, Department of Epidemiology |
| <b>Primary Subject Heading</b>: | HIV/AIDS                                                                                                                                                                                                                                                                                                                                                                                                                                                                                                                                                                                                                                                                                                                                                                                                                                                                                                                                                 |
| Secondary Subject Heading:      | Epidemiology, Haematology (incl blood transfusion)                                                                                                                                                                                                                                                                                                                                                                                                                                                                                                                                                                                                                                                                                                                                                                                                                                                                                                       |
| Keywords:                       | HIV & AIDS < INFECTIOUS DISEASES, integrase inhibitors, antiretroviral therapy, cohort, Anaemia < HAEMATOLOGY                                                                                                                                                                                                                                                                                                                                                                                                                                                                                                                                                                                                                                                                                                                                                                                                                                            |
|                                 |                                                                                                                                                                                                                                                                                                                                                                                                                                                                                                                                                                                                                                                                                                                                                                                                                                                                                                                                                          |

SCHOLARONE™  
Manuscripts



I, the Submitting Author has the right to grant and does grant on behalf of all authors of the Work (as defined in the below author licence), an exclusive licence and/or a non-exclusive licence for contributions from authors who are: i) UK Crown employees; ii) where BMJ has agreed a CC-BY licence shall apply, and/or iii) in accordance with the terms applicable for US Federal Government officers or employees acting as part of their official duties; on a worldwide, perpetual, irrevocable, royalty-free basis to BMJ Publishing Group Ltd ("BMJ") its licensees and where the relevant Journal is co-owned by BMJ to the co-owners of the Journal, to publish the Work in this journal and any other BMJ products and to exploit all rights, as set out in our [licence](#).

The Submitting Author accepts and understands that any supply made under these terms is made by BMJ to the Submitting Author unless you are acting as an employee on behalf of your employer or a postgraduate student of an affiliated institution which is paying any applicable article publishing charge ("APC") for Open Access articles. Where the Submitting Author wishes to make the Work available on an Open Access basis (and intends to pay the relevant APC), the terms of reuse of such Open Access shall be governed by a Creative Commons licence – details of these licences and which [Creative Commons](#) licence will apply to this Work are set out in our licence referred to above.

Other than as permitted in any relevant BMJ Author's Self Archiving Policies, I confirm this Work has not been accepted for publication elsewhere, is not being considered for publication elsewhere and does not duplicate material already published. I confirm all authors consent to publication of this Work and authorise the granting of this licence.



1  
2  
3 1 **A study of antiretroviral drug class and anaemia risk in the**  
4 2 **current treatment era among people living with HIV in the United**  
5 3 **States: A clinical cohort study**  
6 4

7  
8 5 **Authors:** B.N. Harding<sup>1</sup>, B.M. Whitney<sup>1</sup>, R.M. Nance<sup>1</sup>, H.M. Crane<sup>1</sup>,  
9 6 G. Burkholder<sup>2</sup>, R.D. Moore<sup>3</sup>, W.C. Mathews<sup>4</sup>, J.J. Eron<sup>5</sup>, P. W.  
10 7 Hunt<sup>6</sup>, P. Volberding<sup>6</sup>, B. Rodriguez<sup>7</sup>, K.H. Mayer<sup>8</sup>, M.S. Saag<sup>2</sup>,  
11 8 M.M. Kitahata<sup>1</sup>, S.R. Heckbert<sup>1</sup>, J.A.C. Delaney<sup>1</sup>  
12 9

13  
14 10 **Affiliations:**

15 11 <sup>1</sup>University of Washington;

16 12 <sup>2</sup>University of Alabama Birmingham;

17 13 <sup>3</sup>Johns Hopkins University;

18 14 <sup>4</sup>University of California San Diego;

19 15 <sup>5</sup>University of North Carolina, Chapel Hill;

20 16 <sup>6</sup>University of California San Francisco;

21 17 <sup>7</sup>Case Western Reserve University;

22 18 <sup>8</sup>Fenway Health Institute  
23 19

24  
25 20 **Corresponding author:** Barbara N Harding, University of Washington, Department of  
26 21 Epidemiology, 1959 NE Pacific Street, Health Sciences Building F-26, Box 357236, Seattle,  
27 22 WA, 98195. E-mail: hardingb@uw.edu  
28 23

29 24 **Keywords:** antiretroviral agents, cohort, anaemia, integrase  
30 25 inhibitors, protease inhibitors, non-nucleoside reverse  
31 26 transcriptase inhibitors  
32 27

33  
34 28 **Copyright:**

35 29 The Corresponding Author has the right to grant on behalf of all  
36 30 authors and does grant on behalf of all authors, an exclusive  
37 31 license (or non-exclusive for government employees) on a  
38 32 worldwide basis to the BMJ Publishing Group Ltd to permit this  
39 33 article (if accepted) to be published in BMJ editions and any  
40 34 other BMJ PGL products and sublicenses such use and exploit all  
41 35 subsidiary rights, as set out in our license.  
42 36  
43 37

44 38 **Competing interest statement:**

45 39 Dr. Harding reports grants from National Heart, Lung and Blood Institute(NHLBI) during the  
46 40 conduct of the study; Ms. Whitney reports grants from the National Institutes of Health (NIH)  
47 41 during the conduct of the study; Ms. Nance reports grants from NIH during the conduct of the  
48 42 study; Dr. Crane reports grants from NHLBI during the conduct of the study, grants from NIH,  
49 43 grants from ViiV healthcare and grants from PCORI outside the submitted work; Dr. Burkholder  
50 44 reports grants from NIH during the conduct of the study, other from Amgen, Inc outside the  
51 45 submitted work; Dr. Moore reports grants from NHLBI during the conduct of the study; Dr.  
52 46 Mathews reports grants from NHLBI during the conduct of the study; Dr. Eron reports grants  
53 47 from NIH, during the conduct of the study, grants and personal fees from Gilead Sciences, grants  
54 48 and personal fees from ViiV Healthcare, grants and personal fees from Janssen and personal fees  
55 49  
56 50  
57 51  
58 52  
59 53  
60 54

1 from Merck outside the submitted work; Dr. Hunt reports grants from NHLBI during the conduct  
2 of the study, personal fees from Gilead, personal fees from ViiV Healthcare, personal fees from  
3 Janssen and non-financial support from Merck outside the submitted work; Dr. Volberding  
4 reports grants from NHLBI during the conduct of the study, other from Merck outside the  
5 submitted work; Dr. Rodriguez reports grants from NIH during the conduct of the study,  
6 personal fees from Gilead and personal fees from ViiV outside the submitted work; Dr. Mayer  
7 reports grants from NHLBI during the conduct of the study; Dr. Saag reports grants from NIAID  
8 / NIH during the conduct of the study, grants from Gilead, Merck, and ViiV Healthcare outside  
9 the submitted work; Dr. Kitahata reports grants from NHLBI during the conduct of the study; Dr.  
10 Heckbert reports grants from NIH during the conduct of the study; Dr. Delaney reports grants  
11 from NHLBI during the conduct of the study.

### 13 **Contributions:**

14 BNH has conducted all analyses, contributed to methodologic  
15 approach, and written the manuscript. In addition, BMW and RMN  
16 contributed to data preparation and analysis, JACD contributed to the analysis,  
17 HMC, SRH and JACD contributed to conception and design of the work, HMC, GB, RDM,  
18 WCM, JJE, BR, KHM, MSS and MMK contributed to data collection and BNH, BMW, RMN,  
19 HMC, GB, RDM, WCM, JJE, PWH, PV, BR, KHM, MSS, MMK, SRH and JACD contributed  
20 to the interpretation of data and critically revising the manuscript for important intellectual  
21 content.

### 23 **Transparency declaration:**

24 Dr. Harding affirms that the manuscript is an honest, accurate, and transparent account of the  
25 study being reported; that no important aspects of the study have been omitted; and that any  
26 discrepancies from the study as planned (and, if relevant, registered) have been explained.

### 28 **Ethical approval:**

29 Informed consent was obtained from all participants and institutional review boards at each site  
30 approved CNICS protocols for patient protection and provided general approval for secondary  
31 data analysis. The University of Washington Human Subjects Division  
32 served as the institutional review board for the centralized deidentified  
33 CNICS Data Repository (IRB approval number 27674-D).

### 35 **Funding:**

36 This project was funded by R01HL126538-01A1/National Heart, Lung and Blood Institute. They  
37 provided an unrestricted grant and we are completely independent from the study sponsors.  
38 Additional support came from the National Institute of Allergy and Infectious Diseases (NIAID)  
39 at the National Institutes of Health [CNICS R24 AI067039, UW CFAR NIAID Grant P30  
40 AI027757; UNC CFAR grant P30 AI50410, JHU CFAR grant P30 AI094189, and UAB CFAR  
41 grant P30 AI027767]. Dr. Harding is supported by a National Heart, Lung and Blood Institute  
42 grant T32HL007828.

### 44 **Data sharing:**

1 The Centers for AIDS research (CFAR) Network of Integrated Clinical Systems (CNICS) data  
2 may be accessed with an approved concept proposal. Instructions for data access and concept  
3 proposal forms may be found at <https://www.uab.edu/cnics/submit-proposal>.

4  
5 **Dissemination declaration:**

6 Dissemination of the study findings are not applicable to participants or patient organizations.

7  
8 **Abstract:** (276 words)

9 OBJECTIVES: Anaemia is common among people living with HIV  
10 (PLWH) and has been associated with certain, often older,  
11 antiretroviral medications. Information on current  
12 antiretroviral therapy (ART) and anaemia is limited. The  
13 objectives were to compare associations between anaemia  
14 incidence or haemoglobin change with core ART classes in the  
15 current ART era.

16 DESIGN: Retrospective cohort study.

17 SETTING: U.S.-based prospective clinical cohort of PLWH aged 18  
18 and above receiving care at 8 sites between 1/2010-3/2018.

19 PARTICIPANTS: 16,505 PLWH were included in this study.

20 MAIN OUTCOME MEASURES: Anaemia risk and haemoglobin change were  
21 estimated among PLWH for person-time on a protease inhibitor  
22 (PI) or an integrase strand transfer inhibitor (INSTI)-based  
23 regimen, relative to a non-nucleoside reverse transcriptase  
24 inhibitor (NNRTI)-based reference. We also examined PLWH on  
25 regimens containing multiple core classes. Cox proportional  
26 hazards regression analyses were conducted to measure  
27 associations between time-updated ART classes and incident  
28 anaemia or severe anaemia. Linear mixed effects models were used  
29 to examine relationships between ART classes and haemoglobin  
30 change.

31 RESULTS: During a median of 4.9 years of follow-up, 1,040  
32 developed anaemia and 488 developed severe anaemia. Compared to  
33 NNRTI use, INSTI-based regimens were associated with an  
34 increased risk of anaemia (adjusted hazard ratio [aHR] 1.26, 95%  
35 confidence interval [CI] 1.00-1.58) and severe anaemia (aHR 1.51  
36 95%CI 1.07-2.11), and a decrease in haemoglobin level. Time on  
37 multiple core classes was also associated with increased anaemia  
38 risk (aHR 1.39, 95%CI 1.13-1.70), while no associations were  
39 found for PI use.

40 CONCLUSION: These findings suggest INSTI use may increase the  
41 risk of anaemia. If confirmed, screening for anaemia development  
42 in users of INSTIs may be beneficial. Further research into  
43 underlying mechanisms is warranted.

44  
45  
46 **Strengths and limitations of this study:**

- 1 • This study utilized a large and geographically diverse population of PLWH in care across  
2 the U.S.
- 3 • This study leveraged comprehensive clinical data, including information on diagnoses,  
4 medication use, laboratory test results, demographic information, and medical history.
- 5 • This study investigated associations between specific types of ART core regimens and  
6 anaemia risk.
- 7 • This observational study is subject to residual confounding.
- 8 • This study focused on anaemia assessed from haemoglobin lab values taken at regular  
9 medical care visits without excluding participants with conditions strongly associated  
10 with haemoglobin level through mechanisms unrelated to HIV infection.

## 14 Introduction:

15 Anaemia and severe anaemia are common among people living  
16 with HIV (PLWH) [1]. The prevalence of anaemia is elevated in  
17 PLWH compared to the general population. One study reported that  
18 among non-pregnant American women living with HIV, the  
19 prevalence of anaemia was 28.1% compared to 15.1% among women  
20 without HIV [2]. Estimates vary by age, sex, HIV disease stage,  
21 use of antiretroviral therapy (ART) and injection drug use  
22 status [1, 3]. Among PLWH, associations have been found between  
23 anaemia and mortality [4-9], health-related quality-of-life [1],  
24 morbidity, dementia [10], and ART failure [11]. In addition,  
25 anaemia is an independent prognostic indicator associated with  
26 HIV disease progression [1, 12, 13], including development of  
27 AIDS [7].

28 Research shows that ART impacts anaemia risk among PLWH. In  
29 the early treatment era, use of zidovudine (AZT) was a cause of  
30 bone marrow suppression leading to anaemia [14]. However, in  
31 recent years, AZT use has decreased substantially as other,  
32 better tolerated ART medications have become available. Despite  
33 the impact of specific agents such as AZT, ART use in general is  
34 associated with reduced anaemia incidence [15, 16], likely due  
35 to inhibition of HIV disease progression [17]. Current ART  
36 regimens typically include a pair of nucleoside reverse  
37 transcriptase inhibitors (NRTIs) as a backbone plus a core  
38 agent. Common core classes include non-nucleoside reverse-  
39 transcriptase inhibitors (NNRTIs), integrase strand transfer  
40 inhibitors (INSTIs), and protease inhibitors (PIs). While ART  
41 use overall reduces anaemia, little is known about whether  
42 anaemia risk differs between commonly used ART classes in the  
43 current treatment era, particularly the newer INSTI class. From

1 clinical safety data of trials, 36-49% of participants using PIs  
2 had haemoglobin (Hb) levels <10g/dL, indicating anaemia [18],  
3 and in a randomized controlled trial, two participants  
4 discontinued INSTI use due to anaemia adverse events [19].  
5 However, many studies included few participants or were mostly  
6 from an earlier ART era when older ART medications were  
7 predominantly used or from trials that may be less generalizable  
8 to the diverse population of PLWH in clinical care. The  
9 objective of this study was to compare rates of anaemia and  
10 severe anaemia development as well as changes in Hb over time  
11 based on classes of ART used in the current treatment era.

## 12 **Methods :**

### 13 Overview and setting:

14 The present study included PLWH in care in the Centers for  
15 AIDS Research (CFAR) Network of Integrated Clinical Systems  
16 (CNICS) cohort during the period of January 1, 2010 to March 31,  
17 2018 (the date through which each site had complete data  
18 [administrative censor date] varied somewhat, median date:  
19 October 31, 2017). The CNICS cohort has been described in detail  
20 elsewhere [20]. Briefly, CNICS is a dynamic prospective clinical  
21 cohort of >32,000 adult PLWH receiving care at eight  
22 participating sites across the U.S. Comprehensive clinical data,  
23 including diagnoses, ART and other medications, laboratory test  
24 results, demographic information, and historical information,  
25 including ART use before enrollment, is collected through  
26 electronic medical records and other institutional data systems  
27 at each site and harmonized in the CNICS data repository.  
28 Medication data including ART use are entered into the  
29 electronic medical records by clinicians or prescription  
30 fill/refill data are uploaded directly from pharmacy systems and  
31 verified through medical record review. Participants entered the  
32 current study on January 1, 2010 or the earliest date after  
33 January 1, 2010 that they met the following enrollment criteria  
34 (cohort entry date): a) enrollment in CNICS for ≥6 months to  
35 allow time for covariate ascertainment, and b) use of an ART  
36 regimen containing a backbone of 2 NRTIs plus a PI, NNRTI, or  
37 INSTI. In addition, all participants were required to have at  
38 least 2 available haemoglobin lab values during study follow-up.  
39 Figure 1 shows inclusion criteria and exclusions made. Informed  
40 consent was obtained from all participants and institutional  
41 review boards at each site approved CNICS protocols (University  
42 of Washington Human Subjects Division served as the institutional review  
43 board for the centralized deidentified CNICS Data Repository).

### 44 Exposure:

1  
2  
3 1 The exposure of interest was the ART core drug class  
4 2 (NNRTI, INSTI or PI) prescribed as part of an ART regimen (a  
5 3 backbone of two NRTIs plus a core drug). Participants switching  
6 4 to different core drugs within the same class were considered to  
7 5 be continually exposed to the same core drug class. Individuals  
8 6 with a gap of 6 or more months in use of the ART core drug  
9 7 classes of interest were censored at the start of the gap and  
10 8 did not re-enter the study.

11 9 Person-time on INSTI or PI-based regimens was compared to  
12 10 the NNRTI reference. In addition, some PLWH in this cohort had  
13 11 prescriptions for multiple core classes simultaneously.  
14 12 Participants with regimens containing more than 1 core class  
15 13 were categorized separately in analyses as users of "multiple  
16 14 core classes". Boosting agents (e.g. boosted ritonavir, or  
17 15 cobicistat) were not considered a 2<sup>nd</sup> core agent.

#### 17 Outcome ascertainment:

18 18 Hb levels, expressed in grams per deciliter (g/dL), were  
19 19 ascertained using inpatient and outpatient laboratory data  
20 20 obtained as part of clinical care. Outcomes included incident  
21 21 anaemia (first post-baseline Hb measure below 10 g/dL), incident  
22 22 severe anaemia (first post-baseline Hb measure below 7.5 g/dL)  
23 23 [21] and changes in Hb level. Another outcome, chronic anaemia,  
24 24 defined as anaemia lasting for  $\geq 6$  months, was also examined.  
25 25 Chronic anaemia was defined as post-baseline Hb lab results on  
26 26 two separate occasions at least 6 months apart which were  
27 27 consistently in the anemic range without any Hb values above the  
28 28 anaemia range during this 6-month period.

#### 30 Participant characteristics:

31 31 Characteristics that were analyzed as confounders of the  
32 32 association between ART core drugs and incident anaemia, severe  
33 33 anaemia or change in Hb over time included: age, sex,  
34 34 race/ethnicity, CNICS site, hepatitis C virus (HCV) coinfection  
35 35 defined as a detectable HCV RNA level or HCV genotype or HCV  
36 36 antibody, kidney function measured using estimated glomerular  
37 37 filtration rate (eGFR, categorized as  $<30$ ,  $30-59$ , or  $\geq 60$   
38 38 mL/minute/1.73 m<sup>2</sup>) [22], CD4 count (categorized as  $\geq 500$ ,  $350-499$ ,  
39 39  $200-399$ ,  $100-199$  or  $<100$  cells/mm<sup>3</sup>), viral load (VL, assessed as  
40 40  $\log_{10}(\text{VL}+1)$ ), baseline Hb (in incident anemia, severe anemia and  
41 41 chronic anemia only analyses only), and time in care at CNICS  
42 42 sites, defined as time from cohort entry date until the last  
43 43 available CNICS activity: either last lab date or last visit.  
44 44 HCV, eGFR, CD4 count and VL were assessed as part of clinical  
45 45 care visits and were time-updated as repeated measures occurred.  
46 46 All covariates were selected *a priori*, based on review of the  
47 47 literature and clinical knowledge. In addition, assessment of

1 self-reported ART adherence was available for a subset of ~55%  
2 of the study population who were in care after each individual  
3 site initiated a clinical assessment of patient reported  
4 outcomes, including adherence [23].

#### 5 6 Statistical analysis:

7 Baseline characteristics are presented for all participants  
8 at the cohort entry date. Median and interquartile range (IQR)  
9 are displayed for continuous variables and frequencies and  
10 proportions are displayed for categorical variables.

11 Two multivariable Cox proportional hazards regression  
12 analyses were conducted, one among the subset of PLWH who were  
13 anaemia-free at baseline to determine associations between time-  
14 updated NNRTI, PI, and INSTI use and development of anaemia, and  
15 another among the subset of participants who were free of severe  
16 anaemia at baseline to determine associations between time-  
17 updated NNRTI, PI, and INSTI use and development of severe  
18 anaemia.

19 Participants were censored at a) the time they developed  
20 the outcome of interest, b) at the time of last activity in  
21 CNICS, c) at the time of death, d) at the date of administrative  
22 censoring at each site or e) at the time they no longer were  
23 prescribed one of the ART core classes of interest, whichever  
24 came first. The timescale for the models was time since cohort  
25 entry. Complete case analysis methods were used (<2% had missing  
26 data).

27 In a sensitivity analysis, we examined those who were ART-  
28 naïve at baseline and who initiated a regimen including one of  
29 the core ART classes of interest during study follow-up. Follow-  
30 up in this analysis began when a person began their initial ART  
31 regimen and extended until the earliest time of anaemia  
32 occurrence, last activity in CNICS, time of death,  
33 administrative censoring, or at the time their initial regimen  
34 ended. PI or INSTI use were compared to the reference, NNRTI  
35 use. We also examined the change in Hb over time using mixed  
36 models among this ART-naïve population. We also conducted  
37 sensitivity analyses including time-updated NRTI backbone  
38 adjustment for abacavir in analyses of incident anaemia and  
39 incident severe anaemia risk. These sensitivity analyses  
40 addressed possible concerns that the NRTI backbone may influence  
41 anaemia risk rather than the core agent. Finally, we conducted a  
42 sensitivity analysis that excluded users of AZT because of  
43 concerns that AZT has been found strongly associated with  
44 anaemia.

45 Linear mixed effects models with random slopes for time  
46 were used to examine the association of ART core classes with Hb  
47 levels among all PLWH after adjustment for the same

1 characteristics as in the incident anaemia and severe anaemia  
2 analyses. Mixed-effects models utilize random slopes and  
3 intercepts at the participant level to handle irregular patterns  
4 of repeated measures over follow-up [24]. All analyses were  
5 performed using Stata version 14.2.

#### 6 Patient and public involvement:

7 There was no patient or public participation in the present  
8 study.

#### 9 **Results:**

10 In total, 16,505 PLWH met inclusion criteria and were  
11 included in these analyses (Figure 1). Participants had an  
12 average of 11 outpatient Hb values measured during a median  
13 follow-up of 4.9 (IQR 3.0-7.2) years. A total of 12,626 (76%)  
14 were free of anaemia at baseline, and 15,357 (93%) were free of  
15 severe anaemia at baseline. Table 1 provides baseline  
16 characteristics for study participants in the analyses of  
17 incident anaemia and incident severe anaemia. Overall, the mean  
18 age of study participants was 46 years at cohort entry, 20% were  
19 female, and 19% were co-infected with HCV. At baseline, 18% were  
20 prescribed regimens with an NNRTI, 53% with a PI, 14% an INSTI,  
21 and 16% regimens with multiple cores. INSTIs were increasingly  
22 used over the last few years of the study period (Figure 2), and  
23 among those simultaneously prescribed multiple core medications,  
24 the proportion comprised of INSTI plus another core class  
25 increased as study years progressed.

26 The overall incidence of anaemia was 2.1/100 person-years  
27 and the overall incidence of severe anaemia was 0.8/100 person-  
28 years. The unadjusted incidence rates of anaemia and severe  
29 anaemia based on ART core class are provided in Table 2. In  
30 adjusted analyses, INSTI use was associated with an increased  
31 risk of anaemia (aHR 1.26, 95%CI 1.00-1.58) compared to NNRTIs  
32 (Table 3). Use of multiple core classes together was also  
33 associated with an increased risk of anaemia (aHR 1.39, 95%CI  
34 1.13-1.70) while no associations were found between PI use and  
35 anaemia (aHR of 1.09, 95%CI 0.90-1.32). In adjusted analyses  
36 restricted to participants free of severe anaemia at baseline  
37 (Table 3), INSTI use was associated with an increased risk of  
38 severe anaemia (aHR 1.51, 95%CI 1.07-2.11) compared to NNRTI  
39 use. Although the HR appeared elevated, there was no association  
40 between time on multiple ART core classes and an increased risk  
41 of severe anaemia (aHR 1.30 (0.95-1.78), and no association was  
42 found for PIs (aHR 1.09 (0.81-1.47). Among the 12,626 PLWH who  
43 were free of anaemia at baseline, 225 developed chronic anaemia  
44 (lasting for  $\geq 6$  months), during follow-up. For chronic anaemia,  
45 results were similar to those in the primary analysis although  
46  
47



1 confidence intervals overlapped one. Relative to NNRTI use,  
2 person-time on multiple core classes was associated with an aHR  
3 for chronic anaemia of 2.21 (95%CI 0.94-5.18), person-time on an  
4 INSTI with an aHR of 1.90 (95%CI 0.76-4.64) and person-time on a  
5 PI with an aHR of 1.27 (95%CI 0.54-3.04).

6 Average Hb levels remained steady during follow-up; the  
7 mean level was 14.1 g/dL (IQR 12.7-15.1) at baseline and 14.0  
8 g/dL (IQR 12.6-15.2) at the last available measurement per  
9 person. Relative to NNRTI use, a decrease in Hb level over time  
10 was associated with both INSTI use (-0.06 g/dL per year, 95%CI -  
11 0.10, -0.03) and use of multiple core classes (-0.14, 95%CI -  
12 0.18, -0.11). No association was found for PI use (-0.01, 95%CI  
13 -0.04, 0.03). (Table 4).

14 The sensitivity analysis restricted to ART-naïve  
15 participants included 6,426 PLWH who were free of prevalent  
16 anaemia at baseline, of whom 378 developed anaemia. Compared to  
17 NNRTI initiators, those initiating a PI had an aHR of 0.69  
18 (0.45-1.06) while those initiating an INSTI had an aHR of 1.10  
19 (95%CI 0.84-1.44) (Supplemental Table 1). The mixed model  
20 examining change in Hb over time among ART-naïve PLWH initiating  
21 one of the ART core classes of interest included 7,264  
22 participants. Compared to NNRTI initiators, a decrease in Hb was  
23 found for PI use (-0.08g/dL per year, 95%CI -0.16, -0.01), while  
24 INSTI use was associated with a larger decrease in Hb level over  
25 time (-0.15g/dL per year, 95%CI -0.22, -0.09) (Supplemental  
26 Table 2). Results from the sensitivity analyses including time-updated NRTI backbone  
27 adjustment for abacavir were essentially unchanged (Supplemental Table 3). Finally, results  
28 from the sensitivity analysis excluding participants with AZT use indicated similar findings to  
29 those from the primary analyses, although confidence intervals were wider (Supplemental Table  
30 4, 5).

## 31 Discussion:

32 In this study of 16,505 PLWH in care within the United  
33 States in the current treatment era (2010 and after), we  
34 observed that INSTI use, and time on multiple core ART classes,  
35 were associated with decreases in Hb levels during follow-up  
36 compared to using NNRTI-based regimens. We found that INSTI use  
37 was associated with an increased risk of anaemia (aHR 1.26, 95%CI 1.00-  
38 1.58) and severe anaemia (1.51, 95%CI 1.07-2.11) as well as a decrease in Hb levels over  
39 time. Furthermore, the naïve user analysis indicated similar  
40 findings despite a smaller sample size. These findings could  
41 have implications for the treatment approach that should be used  
42 in people with risk factors for anaemia.

43 This study's strengths include its large and geographically  
44 diverse study population and longitudinal data structure.  
45 Nevertheless, there are limitations of this study to consider,  
46 including the observational nature of the data, which may be  
47

1  
2  
3 1 subject to residual confounding including confounding by  
4 2 indication [25]. However, anaemia is not a recognized adverse  
5 3 effect of NNRTIs, PIs, or INSTIs. Thus, it is unlikely that ART  
6 4 core class was selected based on prescriber concern about  
7 5 anaemia risk. Additionally, we did not exclude participants with  
8 6 conditions strongly associated with anaemia or Hb level,  
9 7 including those on dialysis, receiving erythropoietin, or with  
10 8 severe bleeding, which likely caused some of the anaemia cases  
11 9 in this analysis. However, in the sensitivity analysis focusing  
12 10 on factors associated with chronic anaemia (less likely due to  
13 11 bleeding), findings for INSTI vs. NNRTI core regimens were  
14 12 similar to those including all PLWH who became anemic.  
15 13 Information on ART medication use was from prescription data  
16 14 which does not necessarily indicate medications were taken,  
17 15 although self-reported adherence was high (~98%) in the subset  
18 16 for whom adherence information was available. CNICS participants  
19 17 who provided adherence information have been shown to be  
20 18 representative of the overall population of PLWH in CNICS [23,  
21 19 26]. Finally, the fact that this study was conducted among PLWH  
22 20 in care in the U.S. who are on ART may limit the  
23 21 generalizability of findings to PLWH who live outside of the  
24 22 U.S.

25 23 There have been few epidemiologic studies of anaemia risk among users of newer ART  
26 24 core regimens. From clinical safety data reported from multiple trials, approximately 36–49%  
27 25 of participants using PIs had Hb levels <10g/dL, indicating  
28 26 anaemia [18], and in another trial, two participants  
29 27 discontinued INSTI use due to anaemia adverse events [19],  
30 28 however the strict inclusion criteria applied in clinical trials  
31 29 makes it difficult to generalize these findings to more diverse  
32 30 populations of PLWH in clinical care. Another study, conducted  
33 31 during the newer-era of HIV treatment with drugs other than AZT,  
34 32 (during 2008–2012) presented findings for AZT versus non-AZT  
35 33 regimens, finding an increased risk of anaemia among AZT  
36 34 compared to non-AZT regimens (HR=2.84, 95%CI 1.52–5.31) [27].  
37 35 However, anaemia risk was not analyzed separately for the use of  
38 36 specific classes of ART, resulting in the inability of  
39 37 comparison to the present study's findings and a lack of  
40 38 generalizability to PLWH who are treated with newer ART core  
41 39 agents.

42 40 It is possible that PLWH in our study whose HIV is  
43 41 progressing due to resistance or other complications may get  
44 42 switched to an INSTI. This, in addition to prior knowledge that  
45 43 poorly controlled HIV parameters are on their own a risk factor  
46 44 for anaemia [5, 28, 29], could result in confounding by  
47 45 indication. However, the switch to INSTI core regimens since  
48 46 their approval in 2007 has been widespread in this population  
49 47 (Figure 2) and INSTIs are recommended for use as initial

1 regimens [30]. In addition, we rigorously controlled for many of  
2 the important HIV-related factors that correspond to poorly-  
3 controlled HIV, and our sensitivity analysis examining PLWH  
4 initiating their initial regimen failed to reinforce the notion  
5 that an increased risk of anaemia among INSTI core regimen users  
6 could be entirely explained by sicker participants getting  
7 switched to these therapies.

8 PLWH on multiple core classes were in a different category  
9 in our analyses. There are several reasons PLWH may be  
10 prescribed multiple core classes. For example, sometimes PLWH  
11 are prescribed multiple core classes to ensure they receive a  
12 complete regimen while awaiting approval for specific agents  
13 from their insurance company. However, the primary concern was  
14 that they were receiving multiple core classes due to provider  
15 concerns such as prior failed regimens which may also increase  
16 their risk of anaemia.

17 In conclusion, in this large, diverse, multicenter cohort  
18 of PLWH, we found that INSTI use and time on multiple ART core  
19 classes were associated with progression to anaemia and a lower  
20 Hb level. INSTI use was also associated with severe anaemia  
21 risk. Our findings suggest that careful selection of ART regimen  
22 could mitigate anaemia development, although this anaemia risk  
23 needs to be balanced with the possibility of improvement in  
24 overall HIV care [31]. Further research is needed to replicate  
25 the finding of INSTI core regimen use and anaemia risk and to  
26 understand the underlying mechanisms. If confirmed, screening  
27 for anaemia development in users of INSTIs may be beneficial.

## 28 29 **Figure Legends**

30  
31 Figure 1: Flow chart for inclusion/exclusion criteria for 22,027  
32 PLWH in care at CNICS after 1/2010. Exclusions were made for  
33 those not exposed to any of the ART core classes, those with  
34 fewer than 2 haemoglobin levels, and those missing baseline  
35 covariates, resulting in 16,505 PLWH who were included in these  
36 analyses.

37 Figure 2. Proportion of study population (N=16,505) using  
38 various ART classes during complete years of study follow-up.  
39 This figure shows the trends in use of the ART core classes  
40 during 2010-2017.

Table 1. Baseline characteristics of PLWH in CNICS who were receiving an ART core agent of interest (N=16,505)<sup>a</sup>

|                                                              | Incident anaemia analysis<br>(n=12,626) |                                 | Incident severe anaemia analysis<br>(n=15,357) |                                      |
|--------------------------------------------------------------|-----------------------------------------|---------------------------------|------------------------------------------------|--------------------------------------|
|                                                              | Do not develop<br>anaemia<br>(n=11,586) | Develop<br>anaemia<br>(n=1,040) | Do not develop<br>severe anaemia<br>(n=14,869) | Develop severe<br>anaemia<br>(n=488) |
| Age (median, IQR)                                            | 45 (37, 51)                             | 47 (40, 54)                     | 45 (37, 52)                                    | 46 (39, 54)                          |
| Female                                                       | 1574 (14)                               | 276 (27)                        | 2681 (18)                                      | 158 (32)                             |
| Race/ethnicity                                               |                                         |                                 |                                                |                                      |
| White                                                        | 5782 (50)                               | 396 (38)                        | 6840 (46)                                      | 157 (32)                             |
| Black                                                        | 3720 (32)                               | 499 (48)                        | 5442 (37)                                      | 254 (52)                             |
| Hispanic                                                     | 1537 (13)                               | 106 (10)                        | 1920 (13)                                      | 58 (12)                              |
| Other/missing                                                | 547 (5)                                 | 39 (4)                          | 667 (4)                                        | 19 (4)                               |
| Years in CNICS at cohort<br>entry <sup>a</sup> (median, IQR) | 5.2 (2.3, 8.8)                          | 5.8 (2.4, 9.5)                  | 5.5 (2.4, 9.0)                                 | 5.5 (2.8, 9.1)                       |
| Viral load $\geq$ 400<br>copies/ml                           | 2441 (21)                               | 283 (27)                        | 3259 (22)                                      | 172 (35)                             |
| CD4 count (cells/mm <sup>3</sup> )                           |                                         |                                 |                                                |                                      |
| <100                                                         | 528 (5)                                 | 112 (11)                        | 915 (6)                                        | 90 (19)                              |
| 100-199                                                      | 870 (8)                                 | 96 (9)                          | 1256 (8)                                       | 63 (13)                              |
| 200-349                                                      | 1974 (17)                               | 216 (21)                        | 2675 (18)                                      | 113 (23)                             |
| 350-499                                                      | 2497 (21)                               | 226 (22)                        | 3160 (21)                                      | 80 (16)                              |
| $\geq$ 500                                                   | 5717 (49)                               | 390 (38)                        | 6863 (46)                                      | 142 (29)                             |

|                                                                                 |                   |                   |                   |                   |
|---------------------------------------------------------------------------------|-------------------|-------------------|-------------------|-------------------|
| Hepatitis C virus coinfection                                                   | 1816 (16)         | 303 (29)          | 2711 (18)         | 139 (28)          |
| <b>Kidney function (eGFR) (mL/min/1.73 m<sup>2</sup>)</b>                       |                   |                   |                   |                   |
| <30                                                                             | 32 (<1)           | 36 (3)            | 142 (1)           | 42 (9)            |
| 30-59                                                                           | 459 (4)           | 80 (8)            | 731 (5)           | 51 (10)           |
| ≥60                                                                             | 11095 (96)        | 924 (89)          | 13996 (94)        | 395 (81)          |
| <b>Baseline haemoglobin (g/dL) (median, IQR)</b>                                | 14.5 (13.5, 15.4) | 13.3 (12.2, 14.4) | 14.3 (13.1, 15.2) | 12.4 (10.8, 13.8) |
| <b>BMI (kg/m<sup>2</sup>)</b>                                                   |                   |                   |                   |                   |
| <18.5                                                                           | 229 (2)           | 36 (3)            | 377 (3)           | 30 (6)            |
| 18.5 to <25.0                                                                   | 4806 (41)         | 426 (41)          | 6120 (41)         | 211 (43)          |
| 25.0 to <30.0                                                                   | 3929 (34)         | 301 (29)          | 4885 (33)         | 117 (24)          |
| ≥30.0                                                                           | 2622 (23)         | 277 (27)          | 3487 (23)         | 130 (27)          |
| <b>ART core class</b>                                                           |                   |                   |                   |                   |
| NNRTI                                                                           | 2109 (18)         | 177 (17)          | 2633 (18)         | 70 (14)           |
| PI                                                                              | 6135 (53)         | 558 (54)          | 7935 (53)         | 251 (51)          |
| INSTI                                                                           | 1803 (16)         | 93 (9)            | 2126 (14)         | 46 (9)            |
| Multiple core classes                                                           | 1539 (13)         | 212 (20)          | 2175 (15)         | 121 (25)          |
| <b>Self-reported adherence (on a 100-point scale) (median, IQR)<sup>b</sup></b> | 98 (93, 100)      | 98 (91, 99)       | 98 (92, 100)      | 97 (90, 99)       |

<sup>a</sup>Cohort entry date was defined as the earliest date during January 1, 2010– March 31, 2018 that a person had ≥6 months in CNICS and was receiving an ART regimen with a core agent of interest.

<sup>b</sup>For the 55% of the population who reported medication adherence  
Abbreviations: PLWH: people living with HIV, CNICS: Centers for AIDS Research Network of Integrated Clinical Systems, ART: antiretroviral therapy, eGFR: estimated glomerular filtration rate, NNRTI: non-nucleoside reverse transcriptase inhibitor, PI: protease inhibitor, INSTI: integrase strand transfer inhibitor

Table 2. Incidence rate of anaemia (haemoglobin<10 g/dL) and severe anaemia (haemoglobin<7.5 g/dL) by ART core drug class

| ART Regimen           | Follow-up time (person-years) | Events | Rate (per 100 person-years) |
|-----------------------|-------------------------------|--------|-----------------------------|
| <b>Anaemia</b>        |                               |        |                             |
| NNRTI                 | 9,964                         | 150    | 1.50                        |
| PI                    | 24,710                        | 485    | 1.96                        |
| INSTI                 | 7,389                         | 155    | 2.10                        |
| Multiple core classes | 8,172                         | 250    | 3.06                        |
| <b>Severe anaemia</b> |                               |        |                             |
| NNRTI                 | 12,113                        | 57     | 0.47                        |
| PI                    | 31,156                        | 204    | 0.65                        |
| INSTI                 | 9,132                         | 84     | 0.92                        |
| Multiple core classes | 11,258                        | 143    | 1.27                        |

Abbreviations: ART: antiretroviral therapy, NNRTI: non-nucleoside reverse transcriptase inhibitor, PI: protease inhibitor, INSTI: integrase strand transfer inhibitor

1.

1  
2  
3  
4  
5  
6  
7  
8  
9  
10  
11  
12  
13  
14  
15  
16  
17  
18  
19  
20  
21  
22  
23  
24  
25  
26  
27  
28  
29  
30  
31  
32  
33  
34  
35  
36  
37  
38  
39  
40  
41  
42  
43  
44  
45  
46  
47  
48  
49  
50  
51  
52  
53  
54  
55  
56  
57  
58  
59  
60

For peer review only

Table 3. Association of ART core classes with incident anaemia (haemoglobin<10 g/dL), severe anaemia (haemoglobin<7.5 g/dL) or chronic anaemia (>6 months of anaemia)

| ART Regimen           | Hazard Ratio of incident anaemia (n=12,626) |                       | Hazard Ratio of incident severe anaemia (n=15,357) |                       | Hazard Ratio of incident chronic anaemia (n=12,626) |                       |
|-----------------------|---------------------------------------------|-----------------------|----------------------------------------------------|-----------------------|-----------------------------------------------------|-----------------------|
|                       | Unadjusted                                  | Adjusted <sup>a</sup> | Unadjusted                                         | Adjusted <sup>a</sup> | Unadjusted                                          | Adjusted <sup>a</sup> |
| NNRTI (REF)           | 1.00                                        | 1.00                  | 1.00                                               | 1.00                  | 1.00                                                | 1.00                  |
| PI                    | 1.26 (1.05-1.52)                            | 1.09 (0.90, 1.32)     | 1.37 (1.02-1.83)                                   | 1.09 (0.81, 1.47)     | 1.43 (0.61-3.35)                                    | 1.27 (0.54-3.04)      |
| INSTI                 | 1.39 (1.11-1.75)                            | 1.26 (1.00, 1.58)     | 1.96 (1.40-2.75)                                   | 1.51 (1.07, 2.11)     | 2.05 (0.85-4.94)                                    | 1.90 (0.76-4.64)      |
| Multiple core classes | 2.02 (1.65-3.48)                            | 1.39 (1.13, 1.70)     | 2.70 (1.99-3.67)                                   | 1.30 (0.95, 1.78)     | 3.46 (1.51-7.93)                                    | 2.21 (0.94-5.18)      |

<sup>a</sup>Adjusted for age, sex, race/ethnicity, CNICS site, Hepatitis C virus status, CD4 count, viral load, kidney function (eGFR), baseline haemoglobin

Abbreviations: ART: antiretroviral therapy, NNRTI: non-nucleoside reverse transcriptase inhibitor, PI: protease inhibitor, INSTI: integrase strand transfer inhibitor



1 Table 4. Association of ART core classes with change in  
 2 haemoglobin level during follow-up in adjusted analyses (linear  
 3 mixed-effect model); N=16,505

| ART class             | Coefficient <sup>a</sup> | 95% CI       | P-value |
|-----------------------|--------------------------|--------------|---------|
| NNRTI (REF)           |                          |              |         |
| PI                    | -0.01                    | -0.04, 0.03  | 0.675   |
| INSTI                 | -0.06                    | -0.10, -0.03 | <0.001  |
| Multiple core classes | -0.14                    | -0.18, -0.11 | <0.001  |

4 <sup>a</sup>Coefficient is the mean difference per year in Hb (g/dL) for  
 5 each core regimen relative to the NNRTI core regimen, after  
 6 adjustment for site, age, sex, race/ethnicity, hepatitis C virus  
 7 coinfection, CD4 cell count, viral load, eGFR and years in  
 8 study.

9 Abbreviations: ART: antiretroviral therapy, NNRTI: non-  
 10 nucleoside reverse-transcriptase inhibitor, PI: protease  
 11 inhibitor, INSTI: integrase strand transfer inhibitor

1  
2  
3  
4  
5  
6  
7  
8  
9  
10  
11  
12  
13  
14  
15  
16  
17  
18  
19  
20  
21  
22  
23  
24  
25  
26  
27  
28  
29  
30  
31  
32  
33  
34  
35  
36  
37  
38  
39  
40  
41  
42  
43  
44  
45  
46  
47  
48  
49  
50  
51  
52  
53  
54  
55  
56  
57  
58  
59  
60

1  
2

For peer review only

## References :

1. Redig, A.J. and N. Berliner, *Pathogenesis and clinical implications of HIV-related anemia in 2013*. Hematology Am Soc Hematol Educ Program, 2013. **2013**: p. 377-81.
2. Semba, R.D., et al., *Prevalence and cumulative incidence of and risk factors for anemia in a multicenter cohort study of human immunodeficiency virus-infected and -uninfected women*. Clin Infect Dis, 2002. **34**(2): p. 260-6.
3. Belperio, P.S. and D.C. Rhew, *Prevalence and outcomes of anemia in individuals with human immunodeficiency virus: a systematic review of the literature*. Am J Med, 2004. **116 Suppl 7A**: p. 27S-43S.
4. Sullivan, P.S., et al., *Epidemiology of anemia in human immunodeficiency virus (HIV)-infected persons: results from the multistate adult and adolescent spectrum of HIV disease surveillance project*. Blood, 1998. **91**(1): p. 301-8.
5. Mocroft, A., et al., *Anaemia is an independent predictive marker for clinical prognosis in HIV-infected patients from across Europe. EuroSIDA study group*. AIDS, 1999. **13**(8): p. 943-50.
6. Moore, R.D., J.C. Keruly, and R.E. Chaisson, *Anemia and survival in HIV infection*. J Acquir Immune Defic Syndr Hum Retrovirol, 1998. **19**(1): p. 29-33.
7. Graham, N.M., et al., *CD4+ lymphocyte response to zidovudine as a predictor of AIDS-free time and survival time*. J Acquir Immune Defic Syndr, 1993. **6**(11): p. 1258-66.
8. Mocroft, A., et al., *Haemoglobin and anaemia in the SMART study*. Antivir Ther, 2011. **16**(3): p. 329-37.
9. Harris, R.J., et al., *Prognostic importance of anaemia in HIV type-1-infected patients starting antiretroviral therapy: collaborative analysis of prospective cohort studies*. Antivir Ther, 2008. **13**(8): p. 959-67.
10. McArthur, J.C., et al., *Dementia in AIDS patients: incidence and risk factors. Multicenter AIDS Cohort Study*. Neurology, 1993. **43**(11): p. 2245-52.
11. Anude, C.J., et al., *Immuno-virologic outcomes and immuno-virologic discordance among adults alive and on anti-retroviral therapy at 12 months in Nigeria*. BMC Infect Dis, 2013. **13**: p. 113.
12. Kowalska, J.D., et al., *Current hemoglobin levels are more predictive of disease progression than hemoglobin measured at baseline in patients receiving antiretroviral treatment for HIV type 1 infection*. AIDS Res Hum Retroviruses, 2007. **23**(10): p. 1183-8.
13. Lundgren, J.D., et al., *A clinically prognostic scoring system for patients receiving highly active antiretroviral therapy: results from the EuroSIDA study*. J Infect Dis, 2002. **185**(2): p. 178-87.
14. Zauli, G., et al., *tat protein stimulates production of transforming growth factor-beta 1 by marrow macrophages: a potential mechanism for human immunodeficiency virus-1-induced hematopoietic suppression*. Blood, 1992. **80**(12): p. 3036-43.
15. Moore, R.D. and D. Forney, *Anemia in HIV-infected patients receiving highly active antiretroviral therapy*. J Acquir Immune Defic Syndr, 2002. **29**(1): p. 54-7.
16. Kerkhoff, A.D., et al., *Resolution of anaemia in a cohort of HIV-infected patients with a high prevalence and incidence of tuberculosis receiving antiretroviral therapy in South Africa*. BMC Infect Dis, 2014. **14**: p. 3860.
17. Volberding, P.A., et al., *Anemia in HIV infection: clinical impact and evidence-based management strategies*. Clin Infect Dis, 2004. **38**(10): p. 1454-63.

- 1  
2  
3 1 18. Harrison, S.A., *Management of anemia in patients receiving protease inhibitors*.  
4 2 Gastroenterol Hepatol (N Y), 2012. **8**(4): p. 254-6.  
5 3 19. Mullick C MD, Belew Y, *Clinical Review Dolutegravir NDA 204790 SN 00. 2012*.  
6 4 20. Kitahata, M.M., et al., *Cohort profile: the Centers for AIDS Research Network of*  
7 5 *Integrated Clinical Systems*. Int J Epidemiol, 2008. **37**(5): p. 948-55.  
8 6 21. *Division of AIDS. Table for Grading the Severity of Adult and Pediatric Adverse Events*.  
9 7 <http://rcc.tech-res.com/safetyandpharmacovigilance/>. Accessed 3/1/2014.  
10 8 22. Levey, A.S., et al., *A new equation to estimate glomerular filtration rate*. Ann Intern  
11 9 Med, 2009. **150**(9): p. 604-12.  
12 10 23. Fredericksen, R., et al., *Integrating a web-based, patient-administered assessment into*  
13 11 *primary care for HIV-infected adults*. J AIDS HIV Res, 2012. **4**(2): p. 47-55.  
14 12 24. Laird, N.M. and J.H. Ware, *Random-effects models for longitudinal data*. Biometrics,  
15 13 1982. **38**(4): p. 963-74.  
16 14 25. Miettinen, O.S., *The need for randomization in the study of intended effects*. Stat Med,  
17 15 1983. **2**(2): p. 267-71.  
18 16 26. Crane, H.M., et al., *A Comparison of Adherence Timeframes Using Missed Dose Items*  
19 17 *and Their Associations with Viral Load in Routine Clinical Care: Is Longer Better?*  
20 18 AIDS Behav, 2017. **21**(2): p. 470-480.  
21 19 27. Wolde HM, L.W., YMelaku YA, Girmay KH. , *Incidence and Risk Factors of Anemia*  
22 20 *among HIV/AIDS Patients Taking Anti-Retroviral Therapy at Tertiary Hospitals in Addis*  
23 21 *Ababa, Ethiopia: A Retrospective Cohort Study*. Journal of HIV/AIDS and Infectious  
24 22 Diseases, 2013.  
25 23 28. Levine, A.M., et al., *Prevalence and correlates of anemia in a large cohort of HIV-*  
26 24 *infected women: Women's Interagency HIV Study*. J Acquir Immune Defic Syndr, 2001.  
27 25 **26**(1): p. 28-35.  
28 26 29. Zhou, J., et al., *Short-term risk of anaemia following initiation of combination*  
29 27 *antiretroviral treatment in HIV-infected patients in countries in sub-Saharan Africa,*  
30 28 *Asia-Pacific, and central and South America*. J Int AIDS Soc, 2012. **15**(1): p. 5.  
31 29 30. *Panel on Antiretroviral Guidelines for Adults and Adolescents. Guidelines for the Use of*  
32 30 *Antiretroviral Agents in Adults and Adolescents Living with HIV*. Department of Health  
33 31 *and Human Services. Available at [http://www.aidsinfo.nih.gov/ContentFiles/](http://www.aidsinfo.nih.gov/ContentFiles/AdultandAdolescentGL.pdf)*  
34 32 *AdultandAdolescentGL.pdf*. Accessed [October, 2018].  
35 33 31. Nance, R.M., et al., *HIV Viral Suppression Trends Over Time Among HIV-Infected*  
36 34 *Patients Receiving Care in the United States, 1997 to 2015: A Cohort Study*. Ann Intern  
37 35 Med, 2018. **169**(6): p. 376-384.  
38 36  
39  
40  
41  
42  
43  
44  
45  
46  
47  
48  
49  
50  
51  
52  
53  
54  
55  
56  
57  
58  
59  
60

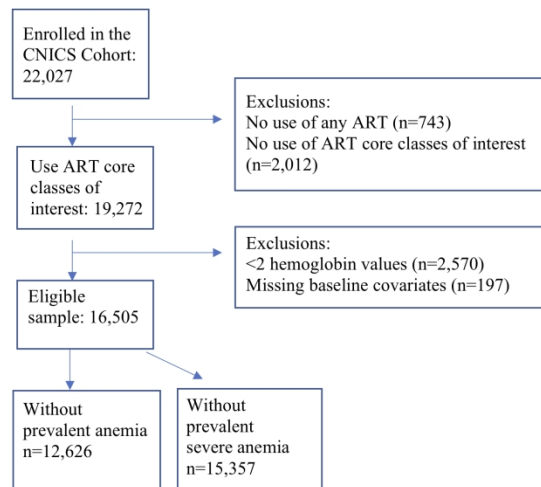

Figure 1: Flow chart for inclusion/exclusion criteria for 22,027 PLWH in care at CNICS after 1/2010. Exclusions were made for those not exposed to any of the ART core classes, those with fewer than 2 haemoglobin levels, and those missing baseline covariates, resulting in 16,505 PLWH who were included in these analyses.

215x279mm (300 x 300 DPI)

1  
2  
3  
4  
5  
6  
7  
8  
9  
10  
11  
12  
13  
14  
15  
16  
17  
18  
19  
20  
21  
22  
23  
24  
25  
26  
27  
28  
29  
30  
31  
32  
33  
34  
35  
36  
37  
38  
39  
40  
41  
42  
43  
44  
45  
46  
47  
48  
49  
50  
51  
52  
53  
54  
55  
56  
57  
58  
59  
60

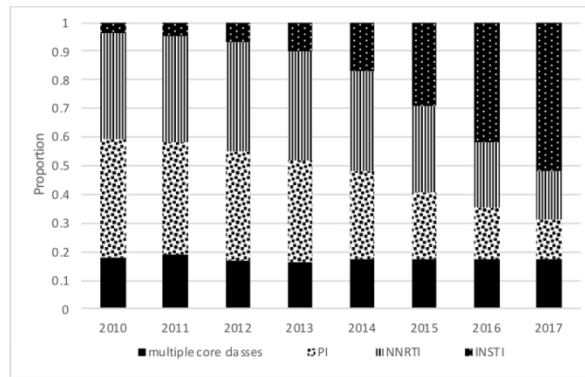

Figure 2. Proportion of study population (N=16,505) using various ART classes during complete years of study follow-up. This figure shows the trends in use of the ART core classes during 2010-2017.

215x279mm (300 x 300 DPI)

Supplemental Table 1: Association of ART classes with incident anaemia among naïve users

| ART class   | Hazard ratio of incident anaemia (n=6,426) |                       |
|-------------|--------------------------------------------|-----------------------|
|             | Unadjusted                                 | Adjusted <sup>a</sup> |
| NNRTI (REF) | 1.00                                       | 1.00                  |
| PI          | 0.92 (0.67-1.247)                          | 0.6978 (0.4556-1.068) |
| INSTI       | 1.73 (1.39-2.15)                           | 1.105 (0.8492, 1.445) |

<sup>a</sup>Adjusted for age, sex, race/ethnicity, CNICS site, Hepatitis C virus status, CD4 count, viral load, kidney function (eGFR) and baseline haemoglobin

Abbreviations: ART: antiretroviral therapy, NNRTI: non-nucleoside reverse-transcriptase inhibitor, PI: protease inhibitor, INSTI: integrase strand transfer inhibitor

Supplemental Table 2. Association of ART classes with change in haemoglobin level during follow-up in adjusted analyses among naïve users (linear mixed-effect model); N=7,264

| ART class   | Coefficient <sup>a</sup> | 95% CI       | P-value |
|-------------|--------------------------|--------------|---------|
| NNRTI (REF) |                          |              |         |
| PI          | -0.08                    | -0.16, -0.01 | 0.031   |
| INSTI       | -0.15                    | -0.22, -0.09 | <0.001  |

<sup>a</sup>Coefficient is the mean difference per year in Hb (g/dL) for each core regimen relative to the NNRTI core regimen, after adjustment for site, age, sex, race/ethnicity, hepatitis C virus coinfection, CD4 cell count, viral load, eGFR and years in study. Abbreviations: ART: antiretroviral therapy, NNRTI: non-nucleoside reverse-transcriptase inhibitor, PI: protease inhibitor, INSTI: integrase strand transfer inhibitor



1 Supplemental Table 3. Association of ART core classes with incident anaemia (haemoglobin<10  
2 g/dL) and severe anaemia (haemoglobin<7.5 g/dL) including time-updated adjustment for  
3 abacavir

| ART Regimen                    | Unadjusted       | Minimally adjusted <sup>a</sup> | With time-updated abacavir adjustment <sup>b</sup> |
|--------------------------------|------------------|---------------------------------|----------------------------------------------------|
| <b>Incident anaemia</b>        |                  |                                 |                                                    |
| NNRTI (REF)                    | 1.00             | 1.00                            | 1.00                                               |
| PI                             | 1.26 (1.05-1.52) | 1.09 (0.90, 1.32)               | 1.07 (0.88-1.30)                                   |
| INSTI                          | 1.39 (1.11-1.75) | 1.26 (1.00, 1.58)               | 1.23 (0.97, 1.56)                                  |
| Multiple core classes          | 2.02 (1.65-3.48) | 1.39 (1.13, 1.70)               | 1.36 (1.09, 1.68)                                  |
| <b>Incident severe anaemia</b> |                  |                                 |                                                    |
| NNRTI (REF)                    | 1.00             | 1.00                            | 1.00                                               |
| PI                             | 1.37 (1.02-1.83) | 1.09 (0.81, 1.47)               | 1.10 (0.80-1.50)                                   |
| INSTI                          | 1.96 (1.40-2.75) | 1.51 (1.07, 2.11)               | 1.52 (1.07, 2.15)                                  |
| Multiple core classes          | 2.70 (1.99-3.67) | 1.30 (0.95, 1.78)               | 1.31 (0.95 1.81)                                   |

4 <sup>a</sup>Minimally adjusted model includes adjustment for: age, sex, race, site, hepatitis C co-infection,  
5 CD4 category, VL, eGFR category and haemoglobin at baseline.

6 <sup>b</sup>Model includes adjustment variables in minimally adjusted model plus a term for time-updated  
7 abacavir use

1  
2  
3  
4  
5  
6  
7  
8  
9  
10  
11  
12  
13  
14  
15  
16  
17  
18  
19  
20  
21  
22  
23  
24  
25  
26  
27  
28  
29  
30  
31  
32  
33  
34  
35  
36  
37  
38  
39  
40  
41  
42  
43  
44  
45  
46  
47  
48  
49  
50  
51  
52  
53  
54  
55  
56  
57  
58  
59  
60

1

For peer review only

Supplemental Table 4. Association of ART core classes with incident anaemia (haemoglobin<10 g/dL) and severe anaemia (haemoglobin<7.5 g/dL) excluding people with AZT use

| ART Regimen           | Hazard Ratio of incident anaemia (n=11,187) |                       | Hazard Ratio of incident severe anaemia (n=13,513) |                       |
|-----------------------|---------------------------------------------|-----------------------|----------------------------------------------------|-----------------------|
|                       | Unadjusted                                  | Adjusted <sup>a</sup> | Unadjusted                                         | Adjusted <sup>a</sup> |
| NNRTI (REF)           | 1.00                                        | 1.00                  | 1.00                                               | 1.00                  |
| PI                    | 1.30 (1.05,1.60)                            | 1.11 (0.90,1.38)      | 1.34 (0.97, 1.86)                                  | 1.05 (0.75, 1.47)     |
| INSTI                 | 1.54 (1.20, 1.97)                           | 1.37 (1.07,1.77)      | 1.90 (1.31, 2.76)                                  | 1.45 (1.00, 2.11)     |
| Multiple core classes | 2.23 (1.76, 2.82)                           | 1.55 (1.22,1.97)      | 2.90 (2.06, 4.08)                                  | 1.34 (0.94, 1.90)     |

<sup>a</sup>Adjusted for age, sex, race/ethnicity, CNICS site, Hepatitis C virus status, CD4 count, viral load, kidney function (eGFR), baseline haemoglobin  
 Abbreviations: ART: antiretroviral therapy, AZT: zidovudine, NNRTI: non-nucleoside reverse transcriptase inhibitor, PI: protease inhibitor, INSTI: integrase strand transfer inhibitor

Supplemental Table 5. Association of ART core classes with change in haemoglobin level during follow-up in adjusted analyses (linear mixed-effect model) excluding people with AZT use; N=14,486

| ART class             | Coefficient <sup>a</sup> | 95% CI       |
|-----------------------|--------------------------|--------------|
| NNRTI (REF)           |                          |              |
| PI                    | 0.00                     | -0.04, 0.04  |
| INSTI                 | -0.05                    | -0.09, -0.01 |
| Multiple core classes | -0.13                    | -0.17, -0.09 |

<sup>a</sup>Coefficient is the mean difference per year in Hb (g/dL) for each core regimen relative to the NNRTI core regimen, after adjustment for site, age, sex, race/ethnicity, hepatitis C virus coinfection, CD4 cell count, viral load, eGFR and years in study.

Abbreviations: ART: antiretroviral therapy, AZT: zidovudine, NNRTI: non-nucleoside reverse-transcriptase inhibitor, PI: protease inhibitor, INSTI: integrase strand transfer inhibitor

STROBE Statement—Checklist of items that should be included in reports of *cohort studies*

|                                                         | Item No | Recommendation                                                                                                                                                                                                                                                                                                         |
|---------------------------------------------------------|---------|------------------------------------------------------------------------------------------------------------------------------------------------------------------------------------------------------------------------------------------------------------------------------------------------------------------------|
| ✓ Title and abstract<br>(page 1-title, page 3 abstract) | 1       | (a) Indicate the study's design with a commonly used term in the title or the abstract<br>(b) Provide in the abstract an informative and balanced summary of what was done and what was found                                                                                                                          |
| <b>Introduction</b>                                     |         |                                                                                                                                                                                                                                                                                                                        |
| ✓ Background/rationale<br>(pages 5, 6)                  | 2       | Explain the scientific background and rationale for the investigation being reported                                                                                                                                                                                                                                   |
| ✓ Objectives<br>(page 6)                                | 3       | State specific objectives, including any prespecified hypotheses                                                                                                                                                                                                                                                       |
| <b>Methods</b>                                          |         |                                                                                                                                                                                                                                                                                                                        |
| ✓ Study design<br>(page 6)                              | 4       | Present key elements of study design early in the paper                                                                                                                                                                                                                                                                |
| ✓ Setting<br>(page 6)                                   | 5       | Describe the setting, locations, and relevant dates, including periods of recruitment, exposure, follow-up, and data collection                                                                                                                                                                                        |
| ✓ Participants<br>(page 6)                              | 6       | (a) Give the eligibility criteria, and the sources and methods of selection of participants. Describe methods of follow-up<br>(b) For matched studies, give matching criteria and number of exposed and unexposed                                                                                                      |
| ✓ Variables<br>(pages 7, 8)                             | 7       | Clearly define all outcomes, exposures, predictors, potential confounders, and effect modifiers. Give diagnostic criteria, if applicable                                                                                                                                                                               |
| ✓ Data sources/<br>measurement<br>(pages 7, 8)          | 8*      | For each variable of interest, give sources of data and details of methods of assessment (measurement). Describe comparability of assessment methods if there is more than one group                                                                                                                                   |
| ✓ Bias<br>(page 9)                                      | 9       | Describe any efforts to address potential sources of bias                                                                                                                                                                                                                                                              |
| ✓ Study size<br>(page 6)                                | 10      | Explain how the study size was arrived at                                                                                                                                                                                                                                                                              |
| ✓ Quantitative variables<br>(pages 7, 8)                | 11      | Explain how quantitative variables were handled in the analyses. If applicable, describe which groupings were chosen and why                                                                                                                                                                                           |
| ✓ Statistical methods<br>(pages 8, 9)                   | 12      | (a) Describe all statistical methods, including those used to control for confounding<br>(b) Describe any methods used to examine subgroups and interactions<br>(c) Explain how missing data were addressed<br>(d) If applicable, explain how loss to follow-up was addressed<br>(e) Describe any sensitivity analyses |
| <b>Results</b>                                          |         |                                                                                                                                                                                                                                                                                                                        |
| ✓ Participants<br>(figure 1, page 9)                    | 13*     | (a) Report numbers of individuals at each stage of study—eg numbers potentially eligible, examined for eligibility, confirmed eligible, included in the study, completing follow-up, and analysed<br>(b) Give reasons for non-participation at each stage<br>(c) Consider use of a flow diagram                        |
| ✓ Descriptive data<br>(pages 9, 10)                     | 14*     | (a) Give characteristics of study participants (eg demographic, clinical, social) and information on exposures and potential confounders<br>(b) Indicate number of participants with missing data for each variable of interest<br>(c) Summarise follow-up time (eg, average and total amount)                         |

|    |                          |     |                                                                                         |
|----|--------------------------|-----|-----------------------------------------------------------------------------------------|
| 1  | ✓Outcome data            | 15* | Report numbers of outcome events or summary measures over time                          |
| 2  | (page 10)                |     |                                                                                         |
| 3  | ✓Main results            | 16  | (a) Give unadjusted estimates and, if applicable, confounder-adjusted estimates         |
| 4  | (pages 10, 11)           |     | and their precision (eg, 95% confidence interval). Make clear which confounders         |
| 5  |                          |     | were adjusted for and why they were included                                            |
| 6  |                          |     | (b) Report category boundaries when continuous variables were categorized               |
| 7  |                          |     | (c) If relevant, consider translating estimates of relative risk into absolute risk for |
| 8  |                          |     | a meaningful time period                                                                |
| 9  | ✓Other analyses          | 17  | Report other analyses done—eg analyses of subgroups and interactions, and               |
| 10 | (page 11)                |     | sensitivity analyses                                                                    |
| 11 | <b>Discussion</b>        |     |                                                                                         |
| 12 | ✓Key results             | 18  | Summarise key results with reference to study objectives                                |
| 13 | (page 11)                |     |                                                                                         |
| 14 | ✓Limitations             | 19  | Discuss limitations of the study, taking into account sources of potential bias or      |
| 15 | (page 12)                |     | imprecision. Discuss both direction and magnitude of any potential bias                 |
| 16 | ✓Interpretation          | 20  | Give a cautious overall interpretation of results considering objectives, limitations,  |
| 17 | (page 13)                |     | multiplicity of analyses, results from similar studies, and other relevant evidence     |
| 18 | ✓Generalisability        | 21  | Discuss the generalisability (external validity) of the study results                   |
| 19 | (pages 12, 13)           |     |                                                                                         |
| 20 | <b>Other information</b> |     |                                                                                         |
| 21 | ✓Funding                 | 22  | Give the source of funding and the role of the funders for the present study and, if    |
| 22 | (page 2)                 |     | applicable, for the original study on which the present article is based                |

\*Give information separately for exposed and unexposed groups.

**Note:** An Explanation and Elaboration article discusses each checklist item and gives methodological background and published examples of transparent reporting. The STROBE checklist is best used in conjunction with this article (freely available on the Web sites of PLoS Medicine at <http://www.plosmedicine.org/>, Annals of Internal Medicine at <http://www.annals.org/>, and Epidemiology at <http://www.epidem.com/>). Information on the STROBE Initiative is available at <http://www.strobe-statement.org>.

# BMJ Open

## A study of antiretroviral drug class and anaemia risk in the current treatment era among people living with HIV in the United States: A clinical cohort study

|                                 |                                                                                                                                                                                                                                                                                                                                                                                                                                                                                                                                                                                                                                                                                                                                                                                                                                                                                                                                                          |
|---------------------------------|----------------------------------------------------------------------------------------------------------------------------------------------------------------------------------------------------------------------------------------------------------------------------------------------------------------------------------------------------------------------------------------------------------------------------------------------------------------------------------------------------------------------------------------------------------------------------------------------------------------------------------------------------------------------------------------------------------------------------------------------------------------------------------------------------------------------------------------------------------------------------------------------------------------------------------------------------------|
| Journal:                        | <i>BMJ Open</i>                                                                                                                                                                                                                                                                                                                                                                                                                                                                                                                                                                                                                                                                                                                                                                                                                                                                                                                                          |
| Manuscript ID                   | bmjopen-2019-031487.R3                                                                                                                                                                                                                                                                                                                                                                                                                                                                                                                                                                                                                                                                                                                                                                                                                                                                                                                                   |
| Article Type:                   | Research                                                                                                                                                                                                                                                                                                                                                                                                                                                                                                                                                                                                                                                                                                                                                                                                                                                                                                                                                 |
| Date Submitted by the Author:   | 17-Feb-2020                                                                                                                                                                                                                                                                                                                                                                                                                                                                                                                                                                                                                                                                                                                                                                                                                                                                                                                                              |
| Complete List of Authors:       | Harding, Barbara; University of Washington, Epidemiology<br>Whitney, Bridget; University of Washington, Epidemiology<br>Nance, Robin; University of Washington, Epidemiology<br>Crane, HM; University of Washington, Medicine<br>Burkholder, Greer; University of Alabama at Birmingham<br>Moore, Richard; Johns Hopkins University School of Medicine, Medicine<br>Mathews, William; University of California, San Diego<br>Eron, Joseph; University of North Carolina at Chapel Hill<br>Hunt, Peter; University of California San Francisco<br>Volberding, Paul ; UCSF, Medicine<br>Rodriguez, Benigno ; Case Western Reserve University<br>Mayer, Kenneth; The Fenway Institute at Fenway Health<br>Saag, Michael ; University of Alabama at Birmingham<br>Kitahata, Mari M. ; University of Washington, Medicine<br>Heckbert, Susan; University of Washington, Epidemiology<br>Delaney, Joseph; University of Washington, Department of Epidemiology |
| <b>Primary Subject Heading</b>: | HIV/AIDS                                                                                                                                                                                                                                                                                                                                                                                                                                                                                                                                                                                                                                                                                                                                                                                                                                                                                                                                                 |
| Secondary Subject Heading:      | Epidemiology, Haematology (incl blood transfusion)                                                                                                                                                                                                                                                                                                                                                                                                                                                                                                                                                                                                                                                                                                                                                                                                                                                                                                       |
| Keywords:                       | HIV & AIDS < INFECTIOUS DISEASES, integrase inhibitors, antiretroviral therapy, cohort, Anaemia < HAEMATOLOGY                                                                                                                                                                                                                                                                                                                                                                                                                                                                                                                                                                                                                                                                                                                                                                                                                                            |
|                                 |                                                                                                                                                                                                                                                                                                                                                                                                                                                                                                                                                                                                                                                                                                                                                                                                                                                                                                                                                          |

SCHOLARONE™  
Manuscripts



I, the Submitting Author has the right to grant and does grant on behalf of all authors of the Work (as defined in the below author licence), an exclusive licence and/or a non-exclusive licence for contributions from authors who are: i) UK Crown employees; ii) where BMJ has agreed a CC-BY licence shall apply, and/or iii) in accordance with the terms applicable for US Federal Government officers or employees acting as part of their official duties; on a worldwide, perpetual, irrevocable, royalty-free basis to BMJ Publishing Group Ltd ("BMJ") its licensees and where the relevant Journal is co-owned by BMJ to the co-owners of the Journal, to publish the Work in this journal and any other BMJ products and to exploit all rights, as set out in our [licence](#).

The Submitting Author accepts and understands that any supply made under these terms is made by BMJ to the Submitting Author unless you are acting as an employee on behalf of your employer or a postgraduate student of an affiliated institution which is paying any applicable article publishing charge ("APC") for Open Access articles. Where the Submitting Author wishes to make the Work available on an Open Access basis (and intends to pay the relevant APC), the terms of reuse of such Open Access shall be governed by a Creative Commons licence – details of these licences and which [Creative Commons](#) licence will apply to this Work are set out in our licence referred to above.

Other than as permitted in any relevant BMJ Author's Self Archiving Policies, I confirm this Work has not been accepted for publication elsewhere, is not being considered for publication elsewhere and does not duplicate material already published. I confirm all authors consent to publication of this Work and authorise the granting of this licence.



1  
2  
3 1 **A study of antiretroviral drug class and anaemia risk in the**  
4 2 **current treatment era among people living with HIV in the United**  
5 3 **States: A clinical cohort study**  
6 4

7  
8 5 **Authors:** B.N. Harding<sup>1</sup>, B.M. Whitney<sup>1</sup>, R.M. Nance<sup>1</sup>, H.M. Crane<sup>1</sup>,  
9 6 G. Burkholder<sup>2</sup>, R.D. Moore<sup>3</sup>, W.C. Mathews<sup>4</sup>, J.J. Eron<sup>5</sup>, P. W.  
10 7 Hunt<sup>6</sup>, P. Volberding<sup>6</sup>, B. Rodriguez<sup>7</sup>, K.H. Mayer<sup>8</sup>, M.S. Saag<sup>2</sup>,  
11 8 M.M. Kitahata<sup>1</sup>, S.R. Heckbert<sup>1</sup>, J.A.C. Delaney<sup>1</sup>  
12 9

13  
14 10 **Affiliations:**

15 11 <sup>1</sup>University of Washington;

16 12 <sup>2</sup>University of Alabama Birmingham;

17 13 <sup>3</sup>Johns Hopkins University;

18 14 <sup>4</sup>University of California San Diego;

19 15 <sup>5</sup>University of North Carolina, Chapel Hill;

20 16 <sup>6</sup>University of California San Francisco;

21 17 <sup>7</sup>Case Western Reserve University;

22 18 <sup>8</sup>Fenway Health Institute  
23 19

24  
25 20 **Corresponding author:** Barbara N Harding, University of Washington, Department of  
26 21 Epidemiology, 1959 NE Pacific Street, Health Sciences Building F-26, Box 357236, Seattle,  
27 22 WA, 98195. E-mail: hardingb@uw.edu  
28 23

29 24 **Keywords:** antiretroviral agents, cohort, anaemia, integrase  
30 25 inhibitors, protease inhibitors, non-nucleoside reverse  
31 26 transcriptase inhibitors  
32 27

33  
34 28 **Copyright:**

35 29 The Corresponding Author has the right to grant on behalf of all  
36 30 authors and does grant on behalf of all authors, an exclusive  
37 31 license (or non-exclusive for government employees) on a  
38 32 worldwide basis to the BMJ Publishing Group Ltd to permit this  
39 33 article (if accepted) to be published in BMJ editions and any  
40 34 other BMJ PGL products and sublicenses such use and exploit all  
41 35 subsidiary rights, as set out in our license.  
42 36  
43 37

44 38 **Competing interest statement:**

45 39 Dr. Harding reports grants from National Heart, Lung and Blood Institute(NHLBI) during the  
46 40 conduct of the study; Ms. Whitney reports grants from the National Institutes of Health (NIH)  
47 41 during the conduct of the study; Ms. Nance reports grants from NIH during the conduct of the  
48 42 study; Dr. Crane reports grants from NHLBI during the conduct of the study, grants from NIH,  
49 43 grants from ViiV healthcare and grants from PCORI outside the submitted work; Dr. Burkholder  
50 44 reports grants from NIH during the conduct of the study, other from Amgen, Inc outside the  
51 45 submitted work; Dr. Moore reports grants from NHLBI during the conduct of the study; Dr.  
52 46 Mathews reports grants from NHLBI during the conduct of the study; Dr. Eron reports grants  
53 47 from NIH, during the conduct of the study, grants and personal fees from Gilead Sciences, grants  
54 48 and personal fees from ViiV Healthcare, grants and personal fees from Janssen and personal fees  
55 49  
56 50  
57 51  
58 52  
59 53  
60 54

1 from Merck outside the submitted work; Dr. Hunt reports grants from NHLBI during the conduct  
2 of the study, personal fees from Gilead, personal fees from ViiV Healthcare, personal fees from  
3 Janssen and non-financial support from Merck outside the submitted work; Dr. Volberding  
4 reports grants from NHLBI during the conduct of the study, other from Merck outside the  
5 submitted work; Dr. Rodriguez reports grants from NIH during the conduct of the study,  
6 personal fees from Gilead and personal fees from ViiV outside the submitted work; Dr. Mayer  
7 reports grants from NHLBI during the conduct of the study; Dr. Saag reports grants from NIAID  
8 / NIH during the conduct of the study, grants from Gilead, Merck, and ViiV Healthcare outside  
9 the submitted work; Dr. Kitahata reports grants from NHLBI during the conduct of the study; Dr.  
10 Heckbert reports grants from NIH during the conduct of the study; Dr. Delaney reports grants  
11 from NHLBI during the conduct of the study.

### 13 **Contributions:**

14 BNH has conducted all analyses, contributed to methodologic  
15 approach, and written the manuscript. In addition, BMW and RMN  
16 contributed to data preparation and analysis, JACD contributed to the analysis,  
17 HMC, SRH and JACD contributed to conception and design of the work, HMC, GB, RDM,  
18 WCM, JJE, BR, KHM, MSS and MMK contributed to data collection and BNH, BMW, RMN,  
19 HMC, GB, RDM, WCM, JJE, PWH, PV, BR, KHM, MSS, MMK, SRH and JACD contributed  
20 to the interpretation of data and critically revising the manuscript for important intellectual  
21 content.

### 23 **Transparency declaration:**

24 Dr. Harding affirms that the manuscript is an honest, accurate, and transparent account of the  
25 study being reported; that no important aspects of the study have been omitted; and that any  
26 discrepancies from the study as planned (and, if relevant, registered) have been explained.

### 28 **Ethical approval:**

29 Informed consent was obtained from all participants and institutional review boards at each site  
30 approved CNICS protocols for patient protection and provided general approval for secondary  
31 data analysis. The University of Washington Human Subjects Division  
32 served as the institutional review board for the centralized deidentified  
33 CNICS Data Repository (IRB approval number 27674-D).

### 35 **Funding:**

36 This project was funded by R01HL126538-01A1/National Heart, Lung and Blood Institute. They  
37 provided an unrestricted grant and we are completely independent from the study sponsors.  
38 Additional support came from the National Institute of Allergy and Infectious Diseases (NIAID)  
39 at the National Institutes of Health [CNICS R24 AI067039, UW CFAR NIAID Grant P30  
40 AI027757; UNC CFAR grant P30 AI50410, JHU CFAR grant P30 AI094189, and UAB CFAR  
41 grant P30 AI027767]. Dr. Harding is supported by a National Heart, Lung and Blood Institute  
42 grant T32HL007828.

### 44 **Data sharing:**

1 The Centers for AIDS research (CFAR) Network of Integrated Clinical Systems (CNICS) data  
2 may be accessed with an approved concept proposal. Instructions for data access and concept  
3 proposal forms may be found at <https://www.uab.edu/cnics/submit-proposal>.

4  
5 **Dissemination declaration:**

6 Dissemination of the study findings are not applicable to participants or patient organizations.

7  
8 **Abstract:** (276 words)

9 OBJECTIVES: Anaemia is common among people living with HIV  
10 (PLWH) and has been associated with certain, often older,  
11 antiretroviral medications. Information on current  
12 antiretroviral therapy (ART) and anaemia is limited. The  
13 objectives were to compare associations between anaemia  
14 incidence or haemoglobin change with core ART classes in the  
15 current ART era.

16 DESIGN: Retrospective cohort study.

17 SETTING: U.S.-based prospective clinical cohort of PLWH aged 18  
18 and above receiving care at 8 sites between 1/2010-3/2018.

19 PARTICIPANTS: 16,505 PLWH were included in this study.

20 MAIN OUTCOME MEASURES: Anaemia risk and haemoglobin change were  
21 estimated among PLWH for person-time on a protease inhibitor  
22 (PI) or an integrase strand transfer inhibitor (INSTI)-based  
23 regimen, relative to a non-nucleoside reverse transcriptase  
24 inhibitor (NNRTI)-based reference. We also examined PLWH on  
25 regimens containing multiple core classes. Cox proportional  
26 hazards regression analyses were conducted to measure  
27 associations between time-updated ART classes and incident  
28 anaemia or severe anaemia. Linear mixed effects models were used  
29 to examine relationships between ART classes and haemoglobin  
30 change.

31 RESULTS: During a median of 4.9 years of follow-up, 1,040  
32 developed anaemia and 488 developed severe anaemia. Compared to  
33 NNRTI use, INSTI-based regimens were associated with an  
34 increased risk of anaemia (adjusted hazard ratio [aHR] 1.26, 95%  
35 confidence interval [CI] 1.00-1.58) and severe anaemia (aHR 1.51  
36 95%CI 1.07-2.11), and a decrease in haemoglobin level. Time on  
37 multiple core classes was also associated with increased anaemia  
38 risk (aHR 1.39, 95%CI 1.13-1.70), while no associations were  
39 found for PI use.

40 CONCLUSION: These findings suggest INSTI use may increase the  
41 risk of anaemia. If confirmed, screening for anaemia development  
42 in users of INSTIs may be beneficial. Further research into  
43 underlying mechanisms is warranted.

44  
45  
46 **Strengths and limitations of this study:**

- 1 • This study utilized a large and geographically diverse population of PLWH in care across  
2 the U.S.
- 3 • This study leveraged comprehensive clinical data, including information on diagnoses,  
4 medication use, laboratory test results, demographic information, and medical history.
- 5 • This study investigated associations between specific types of ART core regimens and  
6 anaemia risk.
- 7 • This observational study is subject to residual confounding.
- 8 • This study focused on anaemia assessed from haemoglobin lab values taken at regular  
9 medical care visits without excluding participants with conditions strongly associated  
10 with haemoglobin level through mechanisms unrelated to HIV infection.

## 14 Introduction:

15 Anaemia and severe anaemia are common among people living  
16 with HIV (PLWH) [1]. The prevalence of anaemia is elevated in  
17 PLWH compared to the general population. One study reported that  
18 among non-pregnant American women living with HIV, the  
19 prevalence of anaemia was 28.1% compared to 15.1% among women  
20 without HIV [2]. Estimates vary by age, sex, HIV disease stage,  
21 use of antiretroviral therapy (ART) and injection drug use  
22 status [1, 3]. Among PLWH, associations have been found between  
23 anaemia and mortality [4-9], health-related quality-of-life [1],  
24 morbidity, dementia [10], and ART failure [11]. In addition,  
25 anaemia is an independent prognostic indicator associated with  
26 HIV disease progression [1, 12, 13], including development of  
27 AIDS [7].

28 Research shows that ART impacts anaemia risk among PLWH. In  
29 the early treatment era, use of zidovudine (AZT) was a cause of  
30 bone marrow suppression leading to anaemia [14]. However, in  
31 recent years, AZT use has decreased substantially as other,  
32 better tolerated ART medications have become available. Despite  
33 the impact of specific agents such as AZT, ART use in general is  
34 associated with reduced anaemia incidence [15, 16], likely due  
35 to inhibition of HIV disease progression [17]. Current ART  
36 regimens typically include a pair of nucleoside reverse  
37 transcriptase inhibitors (NRTIs) as a backbone plus a core  
38 agent. Common core classes include non-nucleoside reverse-  
39 transcriptase inhibitors (NNRTIs), integrase strand transfer  
40 inhibitors (INSTIs), and protease inhibitors (PIs). While ART  
41 use overall reduces anaemia, little is known about whether  
42 anaemia risk differs between commonly used ART classes in the  
43 current treatment era, particularly the newer INSTI class. From

1 clinical safety data of trials, 36-49% of participants using PIs  
2 had haemoglobin (Hb) levels <10g/dL, indicating anaemia [18],  
3 and in a randomized controlled trial, two participants  
4 discontinued INSTI use due to anaemia adverse events [19].  
5 However, many studies included few participants or were mostly  
6 from an earlier ART era when older ART medications were  
7 predominantly used or from trials that may be less generalizable  
8 to the diverse population of PLWH in clinical care. The  
9 objective of this study was to compare rates of anaemia and  
10 severe anaemia development as well as changes in Hb over time  
11 based on classes of ART used in the current treatment era.

## 12 **Methods :**

### 13 Overview and setting:

14 The present study included PLWH in care in the Centers for  
15 AIDS Research (CFAR) Network of Integrated Clinical Systems  
16 (CNICS) cohort during the period of January 1, 2010 to March 31,  
17 2018 (the date through which each site had complete data  
18 [administrative censor date] varied somewhat, median date:  
19 October 31, 2017). The CNICS cohort has been described in detail  
20 elsewhere [20]. Briefly, CNICS is a dynamic prospective clinical  
21 cohort of >32,000 adult PLWH receiving care at eight  
22 participating sites across the U.S. Comprehensive clinical data,  
23 including diagnoses, ART and other medications, laboratory test  
24 results, demographic information, and historical information,  
25 including ART use before enrollment, is collected through  
26 electronic medical records and other institutional data systems  
27 at each site and harmonized in the CNICS data repository.  
28 Medication data including ART use are entered into the  
29 electronic medical records by clinicians or prescription  
30 fill/refill data are uploaded directly from pharmacy systems and  
31 verified through medical record review. Participants entered the  
32 current study on January 1, 2010 or the earliest date after  
33 January 1, 2010 that they met the following enrollment criteria  
34 (cohort entry date): a) enrollment in CNICS for ≥6 months to  
35 allow time for covariate ascertainment, and b) use of an ART  
36 regimen containing a backbone of 2 NRTIs plus a PI, NNRTI, or  
37 INSTI. In addition, all participants were required to have at  
38 least 2 available haemoglobin lab values during study follow-up.  
39 Figure 1 shows inclusion criteria and exclusions made. Informed  
40 consent was obtained from all participants and institutional  
41 review boards at each site approved CNICS protocols (University  
42 of Washington Human Subjects Division served as the institutional review  
43 board for the centralized deidentified CNICS Data Repository).

### 44 Exposure:

1  
2  
3 1 The exposure of interest was the ART core drug class  
4 2 (NNRTI, INSTI or PI) prescribed as part of an ART regimen (a  
5 3 backbone of two NRTIs plus a core drug). Participants switching  
6 4 to different core drugs within the same class were considered to  
7 5 be continually exposed to the same core drug class. Individuals  
8 6 with a gap of 6 or more months in use of the ART core drug  
9 7 classes of interest were censored at the start of the gap and  
10 8 did not re-enter the study.

11 9 Person-time on INSTI or PI-based regimens was compared to  
12 10 the NNRTI reference. In addition, some PLWH in this cohort had  
13 11 prescriptions for multiple core classes simultaneously.  
14 12 Participants with regimens containing more than 1 core class  
15 13 were categorized separately in analyses as users of "multiple  
16 14 core classes". Boosting agents (e.g. boosted ritonavir, or  
17 15 cobicistat) were not considered a 2<sup>nd</sup> core agent.

#### 18 17 Outcome ascertainment:

19 18 Hb levels, expressed in grams per deciliter (g/dL), were  
20 19 ascertained using inpatient and outpatient laboratory data  
21 20 obtained as part of clinical care. Outcomes included incident  
22 21 anaemia (first post-baseline Hb measure below 10 g/dL), incident  
23 22 severe anaemia (first post-baseline Hb measure below 7.5 g/dL)  
24 23 [21] and changes in Hb level. Another outcome, chronic anaemia,  
25 24 defined as anaemia lasting for  $\geq 6$  months, was also examined.  
26 25 Chronic anaemia was defined as post-baseline Hb lab results on  
27 26 two separate occasions at least 6 months apart which were  
28 27 consistently in the anemic range without any Hb values above the  
29 28 anaemia range during this 6-month period.

#### 30 30 Participant characteristics:

31 31 Characteristics that were analyzed as confounders of the  
32 32 association between ART core drugs and incident anaemia, severe  
33 33 anaemia or change in Hb over time included: age, sex,  
34 34 race/ethnicity, CNICS site, hepatitis C virus (HCV) coinfection  
35 35 defined as a detectable HCV RNA level or HCV genotype or HCV  
36 36 antibody, kidney function measured using estimated glomerular  
37 37 filtration rate (eGFR, categorized as  $<30$ ,  $30-59$ , or  $\geq 60$   
38 38 mL/minute/1.73 m<sup>2</sup>) [22], CD4 count (categorized as  $\geq 500$ ,  $350-499$ ,  
39 39  $200-399$ ,  $100-199$  or  $<100$  cells/mm<sup>3</sup>), viral load (VL, assessed as  
40 40  $\log_{10}(\text{VL}+1)$ ), baseline Hb (in incident anemia, severe anemia and  
41 41 chronic anemia analyses only), and time in care at CNICS sites,  
42 42 defined as time from cohort entry date until the last available  
43 43 CNICS activity: either last lab date or last visit. HCV, eGFR,  
44 44 CD4 count and VL were assessed as part of clinical care visits  
45 45 and were time-updated as repeated measures occurred. All  
46 46 covariates were selected *a priori*, based on review of the  
47 47 literature and clinical knowledge. In addition, assessment of

1 self-reported ART adherence was available for a subset of ~55%  
2 of the study population who were in care after each individual  
3 site initiated a clinical assessment of patient reported  
4 outcomes, including adherence [23].

#### 5 6 Statistical analysis:

7 Baseline characteristics are presented for all participants  
8 at the cohort entry date. Median and interquartile range (IQR)  
9 are displayed for continuous variables and frequencies and  
10 proportions are displayed for categorical variables.

11 Two multivariable Cox proportional hazards regression  
12 analyses were conducted, one among the subset of PLWH who were  
13 anaemia-free at baseline to determine associations between time-  
14 updated NNRTI, PI, and INSTI use and development of anaemia, and  
15 another among the subset of participants who were free of severe  
16 anaemia at baseline to determine associations between time-  
17 updated NNRTI, PI, and INSTI use and development of severe  
18 anaemia.

19 Participants were censored at a) the time they developed  
20 the outcome of interest, b) at the time of last activity in  
21 CNICS, c) at the time of death, d) at the date of administrative  
22 censoring at each site or e) at the time they no longer were  
23 prescribed one of the ART core classes of interest, whichever  
24 came first. The timescale for the models was time since cohort  
25 entry. Complete case analysis methods were used (<2% had missing  
26 data).

27 In a sensitivity analysis, we examined those who were ART-  
28 naïve at baseline and who initiated a regimen including one of  
29 the core ART classes of interest during study follow-up. Follow-  
30 up in this analysis began when a person began their initial ART  
31 regimen and extended until the earliest time of anaemia  
32 occurrence, last activity in CNICS, time of death,  
33 administrative censoring, or at the time their initial regimen  
34 ended. PI or INSTI use were compared to the reference, NNRTI  
35 use. We also examined the change in Hb over time using mixed  
36 models among this ART-naïve population. We also conducted  
37 sensitivity analyses including time-updated NRTI backbone  
38 regimen adjustment in analyses of incident anaemia and incident  
39 severe anaemia risk. These sensitivity analyses addressed  
40 possible concerns that the NRTI backbone may influence anaemia  
41 risk rather than the core agent. Finally, we conducted a  
42 sensitivity analysis that excluded users of AZT from comparisons  
43 of NNRTI, PI and INSTI use versus the referent category of NNRTI  
44 use because of concerns that AZT has been found strongly  
45 associated with anaemia.

46 Linear mixed effects models with random slopes for time  
47 were used to examine the association of ART core classes with Hb

1 levels among all PLWH after adjustment for the same  
2 characteristics as in the incident anaemia and severe anaemia  
3 analyses. Mixed-effects models utilize random slopes and  
4 intercepts at the participant level to handle irregular patterns  
5 of repeated measures over follow-up [24]. All analyses were  
6 performed using Stata version 14.2.

#### 7 Patient and public involvement:

8 There was no patient or public participation in the present  
9 study.

#### 10 **Results:**

11 In total, 16,505 PLWH met inclusion criteria and were  
12 included in these analyses (Figure 1). Participants had an  
13 average of 11 outpatient Hb values measured during a median  
14 follow-up of 4.9 (IQR 3.0-7.2) years. A total of 12,626 (76%)  
15 were free of anaemia at baseline, and 15,357 (93%) were free of  
16 severe anaemia at baseline. Table 1 provides baseline  
17 characteristics for study participants in the analyses of  
18 incident anaemia and incident severe anaemia. Overall, the mean  
19 age of study participants was 46 years at cohort entry, 20% were  
20 female, and 19% were co-infected with HCV. At baseline, 18% were  
21 prescribed regimens with an NNRTI, 53% with a PI, 14% an INSTI,  
22 and 16% regimens with multiple cores. INSTIs were increasingly  
23 used over the last few years of the study period (Figure 2), and  
24 among those simultaneously prescribed multiple core medications,  
25 the proportion comprised of INSTI plus another core class  
26 increased as study years progressed. In the analytic study sample, backbone  
27 regimens mainly consisted of emtricitabine/lamivudine (3TC) plus tenofovir or 3TC plus  
28 abacavir (Supplemental Table 1).

29 The overall incidence of anaemia was 2.1/100 person-years  
30 and the overall incidence of severe anaemia was 0.8/100 person-  
31 years. The unadjusted incidence rates of anaemia and severe  
32 anaemia based on ART core class are provided in Table 2. In  
33 adjusted analyses, INSTI use was associated with an increased  
34 risk of anaemia (aHR 1.26, 95%CI 1.00-1.58) compared to NNRTIs  
35 (Table 3). Use of multiple core classes together was also  
36 associated with an increased risk of anaemia (aHR 1.39, 95%CI  
37 1.13-1.70) while no associations were found between PI use and  
38 anaemia (aHR of 1.09, 95%CI 0.90-1.32). In adjusted analyses  
39 restricted to participants free of severe anaemia at baseline  
40 (Table 3), INSTI use was associated with an increased risk of  
41 severe anaemia (aHR 1.51, 95%CI 1.07-2.11) compared to NNRTI  
42 use. Although the HR appeared elevated, there was no association  
43 between time on multiple ART core classes and an increased risk  
44 of severe anaemia (aHR 1.30 (0.95-1.78), and no association was  
45 found for PIs (aHR 1.09 (0.81-1.47)). Among the 12,626 PLWH who  
46  
47



1 were free of anaemia at baseline, 225 developed chronic anaemia  
2 (lasting for  $\geq 6$  months), during follow-up. For chronic anaemia,  
3 results were similar to those in the primary analysis although  
4 confidence intervals overlapped 1. Relative to NNRTI use,  
5 person-time on multiple core classes was associated with an aHR  
6 for chronic anaemia of 2.21 (95%CI 0.94-5.18), person-time on an  
7 INSTI with an aHR of 1.90 (95%CI 0.76-4.64) and person-time on a  
8 PI with an aHR of 1.27 (95%CI 0.54-3.04).

9 Average Hb levels remained steady during follow-up; the  
10 mean level was 14.1 g/dL (IQR 12.7-15.1) at baseline and 14.0  
11 g/dL (IQR 12.6-15.2) at the last available measurement per  
12 person. Relative to NNRTI use, a decrease in Hb level over time  
13 was associated with both INSTI use (-0.06 g/dL per year, 95%CI -  
14 0.10, -0.03) and use of multiple core classes (-0.14, 95%CI -  
15 0.18, -0.11). No association was found for PI use (-0.01, 95%CI  
16 -0.04, 0.03). (Table 4).

17 The sensitivity analysis restricted to ART-naïve  
18 participants included 6,426 PLWH who were free of prevalent  
19 anaemia at baseline, of whom 378 developed anaemia. Compared to  
20 NNRTI initiators, those initiating a PI had an aHR of 0.69  
21 (0.45-1.06) while those initiating an INSTI had an aHR of 1.10  
22 (95%CI 0.84-1.44) (Supplemental Table 2). The mixed model  
23 examining change in Hb over time among ART-naïve PLWH initiating  
24 one of the ART core classes of interest included 7,264  
25 participants. Compared to NNRTI initiators, a decrease in Hb was  
26 found for PI use (-0.08g/dL per year, 95%CI -0.16, -0.01), while  
27 INSTI use was associated with a larger decrease in Hb level over  
28 time (-0.15g/dL per year, 95%CI -0.22, -0.09) (Supplemental  
29 Table 3). Results from the sensitivity analyses including time-updated NRTI backbone  
30 regimen adjustment were essentially unchanged (Supplemental Table 4). Finally, results from the  
31 sensitivity analysis excluding participants with AZT use indicated similar findings to those from  
32 the primary analyses, although confidence intervals were wider (Supplemental Table 5, 6).

### 33 Discussion:

34 In this study of 16,505 PLWH in care within the United  
35 States in the current treatment era (2010 and after), we  
36 observed that INSTI use, and time on multiple core ART classes,  
37 were associated with decreases in Hb levels during follow-up  
38 compared to using NNRTI-based regimens. We found that INSTI use  
39 was associated with an increased risk of anaemia (aHR 1.26, 95%CI 1.00-  
40 1.58) and severe anaemia (1.51, 95%CI 1.07-2.11) as well as a decrease in Hb levels over  
41 time. Furthermore, the naïve user analysis indicated similar  
42 findings despite a smaller sample size. These findings could  
43 have implications for the treatment approach that should be used  
44 in people with risk factors for anaemia.

45 This study's strengths include its large and geographically  
46 diverse study population and longitudinal data structure.  
47

1  
2  
3 1 Nevertheless, there are limitations of this study to consider,  
4 2 including the observational nature of the data, which may be  
5 3 subject to residual confounding including confounding by  
6 4 indication [25]. However, anaemia is not a recognized adverse  
7 5 effect of NNRTIs, PIs, or INSTIs. Thus, it is unlikely that ART  
8 6 core class was selected based on prescriber concern about  
9 7 anaemia risk. Additionally, we did not exclude participants with  
10 8 conditions strongly associated with anaemia or Hb level,  
11 9 including those on dialysis, receiving erythropoietin, or with  
12 10 severe bleeding, which likely caused some of the anaemia cases  
13 11 in this analysis. However, in the sensitivity analysis focusing  
14 12 on factors associated with chronic anaemia (less likely due to  
15 13 bleeding), findings for INSTI vs. NNRTI core regimens were  
16 14 similar to those including all PLWH who became anemic.  
17 15 Information on ART medication use was from prescription data  
18 16 which does not necessarily indicate medications were taken,  
19 17 although self-reported adherence was high (~98%) in the subset  
20 18 for whom adherence information was available. CNICS participants  
21 19 who provided adherence information have been shown to be  
22 20 representative of the overall population of PLWH in CNICS [23,  
23 21 26]. Finally, the fact that this study was conducted among PLWH  
24 22 in care in the U.S. who are on ART may limit the  
25 23 generalizability of findings to PLWH who live outside of the  
26 24 U.S.

27 25 There have been few epidemiologic studies of anaemia risk among users of newer ART  
28 26 core regimens. From clinical safety data reported from multiple trials, approximately 36–49%  
29 27 of participants using PIs had Hb levels <10g/dL, indicating  
30 28 anaemia [18], and in another trial, two participants  
31 29 discontinued INSTI use due to anaemia adverse events [19],  
32 30 however the strict inclusion criteria applied in clinical trials  
33 31 makes it difficult to generalize these findings to more diverse  
34 32 populations of PLWH in clinical care. Another study, conducted  
35 33 during the newer-era of HIV treatment with drugs other than AZT,  
36 34 (during 2008–2012) presented findings for AZT versus non-AZT  
37 35 regimens, finding an increased risk of anaemia among AZT  
38 36 compared to non-AZT regimens (HR=2.84, 95%CI 1.52–5.31) [27].  
39 37 However, anaemia risk was not analyzed separately for the use of  
40 38 specific classes of ART, resulting in the inability of  
41 39 comparison to the present study's findings and a lack of  
42 40 generalizability to PLWH who are treated with newer ART core  
43 41 agents.

44 42 It is possible that PLWH in our study whose HIV is  
45 43 progressing due to resistance or other complications may get  
46 44 switched to an INSTI. This, in addition to prior knowledge that  
47 45 poorly controlled HIV parameters are on their own a risk factor  
48 46 for anaemia [5, 28, 29], could result in confounding by  
49 47 indication. However, the switch to INSTI core regimens since

1 their approval in 2007 has been widespread in this population  
2 (Figure 2) and INSTIs are recommended for use as initial  
3 regimens [30]. In addition, we rigorously controlled for many of  
4 the important HIV-related factors that correspond to poorly-  
5 controlled HIV, and our sensitivity analysis examining PLWH  
6 initiating their initial regimen failed to reinforce the notion  
7 that an increased risk of anaemia among INSTI core regimen users  
8 could be entirely explained by sicker participants getting  
9 switched to these therapies.

10 PLWH on multiple core classes were in a different category  
11 in our analyses. There are several reasons PLWH may be  
12 prescribed multiple core classes. For example, sometimes PLWH  
13 are prescribed multiple core classes to ensure they receive a  
14 complete regimen while awaiting approval for specific agents  
15 from their insurance company. However, the primary concern was  
16 that they were receiving multiple core classes due to provider  
17 concerns such as prior failed regimens which may also increase  
18 their risk of anaemia.

19 In conclusion, in this large, diverse, multicenter cohort  
20 of PLWH, we found that INSTI use and time on multiple ART core  
21 classes were associated with progression to anaemia and a lower  
22 Hb level. INSTI use was also associated with severe anaemia  
23 risk. Our findings suggest that careful selection of ART regimen  
24 could mitigate anaemia development, although this anaemia risk  
25 needs to be balanced with the possibility of improvement in  
26 overall HIV care [31]. Further research is needed to replicate  
27 the finding of INSTI core regimen use and anaemia risk and to  
28 understand the underlying mechanisms. If confirmed, screening  
29 for anaemia development in users of INSTIs may be beneficial.

### 30 31 **Figure Legends**

32  
33 Figure 1: Flow chart for inclusion/exclusion criteria for 22,027  
34 PLWH in care at CNICS after 1/2010. Exclusions were made for  
35 those not exposed to any of the ART core classes, those with  
36 fewer than 2 haemoglobin levels, and those missing baseline  
37 covariates, resulting in 16,505 PLWH who were included in these  
38 analyses.

39 Figure 2. Proportion of study population (N=16,505) using  
40 various ART classes during complete years of study follow-up.  
41 This figure shows the trends in use of the ART core classes  
42 during 2010-2017.

Table 1. Baseline characteristics of PLWH in CNICS who were receiving an ART core agent of interest (N=16,505)<sup>a</sup>

|                                                              | Incident anaemia analysis<br>(n=12,626) |                                 | Incident severe anaemia analysis<br>(n=15,357) |                                      |
|--------------------------------------------------------------|-----------------------------------------|---------------------------------|------------------------------------------------|--------------------------------------|
|                                                              | Do not develop<br>anaemia<br>(n=11,586) | Develop<br>anaemia<br>(n=1,040) | Do not develop<br>severe anaemia<br>(n=14,869) | Develop severe<br>anaemia<br>(n=488) |
| Age (median, IQR)                                            | 45 (37, 51)                             | 47 (40, 54)                     | 45 (37, 52)                                    | 46 (39, 54)                          |
| Female                                                       | 1574 (14)                               | 276 (27)                        | 2681 (18)                                      | 158 (32)                             |
| Race/ethnicity                                               |                                         |                                 |                                                |                                      |
| White                                                        | 5782 (50)                               | 396 (38)                        | 6840 (46)                                      | 157 (32)                             |
| Black                                                        | 3720 (32)                               | 499 (48)                        | 5442 (37)                                      | 254 (52)                             |
| Hispanic                                                     | 1537 (13)                               | 106 (10)                        | 1920 (13)                                      | 58 (12)                              |
| Other/missing                                                | 547 (5)                                 | 39 (4)                          | 667 (4)                                        | 19 (4)                               |
| Years in CNICS at cohort<br>entry <sup>a</sup> (median, IQR) | 5.2 (2.3, 8.8)                          | 5.8 (2.4, 9.5)                  | 5.5 (2.4, 9.0)                                 | 5.5 (2.8, 9.1)                       |
| Viral load $\geq$ 400<br>copies/ml                           | 2441 (21)                               | 283 (27)                        | 3259 (22)                                      | 172 (35)                             |
| CD4 count (cells/mm <sup>3</sup> )                           |                                         |                                 |                                                |                                      |
| <100                                                         | 528 (5)                                 | 112 (11)                        | 915 (6)                                        | 90 (19)                              |
| 100-199                                                      | 870 (8)                                 | 96 (9)                          | 1256 (8)                                       | 63 (13)                              |
| 200-349                                                      | 1974 (17)                               | 216 (21)                        | 2675 (18)                                      | 113 (23)                             |
| 350-499                                                      | 2497 (21)                               | 226 (22)                        | 3160 (21)                                      | 80 (16)                              |

1.

|                                                                           |                   |                   |                   |                   |
|---------------------------------------------------------------------------|-------------------|-------------------|-------------------|-------------------|
| ≥500                                                                      | 5717 (49)         | 390 (38)          | 6863 (46)         | 142 (29)          |
| Hepatitis C virus coinfection                                             | 1816 (16)         | 303 (29)          | 2711 (18)         | 139 (28)          |
| Kidney function (eGFR) (mL/min/1.73 m <sup>2</sup> )                      |                   |                   |                   |                   |
| <30                                                                       | 32 (<1)           | 36 (3)            | 142 (1)           | 42 (9)            |
| 30-59                                                                     | 459 (4)           | 80 (8)            | 731 (5)           | 51 (10)           |
| ≥60                                                                       | 11095 (96)        | 924 (89)          | 13996 (94)        | 395 (81)          |
| Baseline haemoglobin (g/dL) (median, IQR)                                 | 14.5 (13.5, 15.4) | 13.3 (12.2, 14.4) | 14.3 (13.1, 15.2) | 12.4 (10.8, 13.8) |
| BMI (kg/m <sup>2</sup> )                                                  |                   |                   |                   |                   |
| <18.5                                                                     | 229 (2)           | 36 (3)            | 377 (3)           | 30 (6)            |
| 18.5 to <25.0                                                             | 4806 (41)         | 426 (41)          | 6120 (41)         | 211 (43)          |
| 25.0 to <30.0                                                             | 3929 (34)         | 301 (29)          | 4885 (33)         | 117 (24)          |
| ≥30.0                                                                     | 2622 (23)         | 277 (27)          | 3487 (23)         | 130 (27)          |
| ART core class                                                            |                   |                   |                   |                   |
| NNRTI                                                                     | 2109 (18)         | 177 (17)          | 2633 (18)         | 70 (14)           |
| PI                                                                        | 6135 (53)         | 558 (54)          | 7935 (53)         | 251 (51)          |
| INSTI                                                                     | 1803 (16)         | 93 (9)            | 2126 (14)         | 46 (9)            |
| Multiple core classes                                                     | 1539 (13)         | 212 (20)          | 2175 (15)         | 121 (25)          |
| Self-reported adherence (on a 100-point scale) (median, IQR) <sup>b</sup> | 98 (93, 100)      | 98 (91, 99)       | 98 (92, 100)      | 97 (90, 99)       |

<sup>a</sup>Cohort entry date was defined as the earliest date during January 1, 2010- March 31, 2018 that a person had ≥6 months in CNICS and was receiving an ART regimen with a core agent of interest.

<sup>b</sup>For the 55% of the population who reported medication adherence Abbreviations: PLWH: people living with HIV, CNICS: Centers for AIDS Research Network of Integrated Clinical Systems, ART: antiretroviral therapy, eGFR: estimated glomerular filtration rate, NNRTI: non-nucleoside reverse transcriptase inhibitor, PI: protease inhibitor, INSTI: integrase strand transfer inhibitor

Table 2. Incidence rate of anaemia (haemoglobin<10 g/dL) and severe anaemia (haemoglobin<7.5 g/dL) by ART core drug class

| ART Regimen           | Follow-up time (person-years) | Events | Rate (per 100 person-years) |
|-----------------------|-------------------------------|--------|-----------------------------|
| <b>Anaemia</b>        |                               |        |                             |
| NNRTI                 | 9,964                         | 150    | 1.50                        |
| PI                    | 24,710                        | 485    | 1.96                        |
| INSTI                 | 7,389                         | 155    | 2.10                        |
| Multiple core classes | 8,172                         | 250    | 3.06                        |
| <b>Severe anaemia</b> |                               |        |                             |
| NNRTI                 | 12,113                        | 57     | 0.47                        |
| PI                    | 31,156                        | 204    | 0.65                        |
| INSTI                 | 9,132                         | 84     | 0.92                        |
| Multiple core classes | 11,258                        | 143    | 1.27                        |

Abbreviations: ART: antiretroviral therapy, NNRTI: non-nucleoside reverse transcriptase inhibitor, PI: protease inhibitor, INSTI: integrase strand transfer inhibitor

1.

1  
2  
3  
4  
5  
6  
7  
8  
9  
10  
11  
12  
13  
14  
15  
16  
17  
18  
19  
20  
21  
22  
23  
24  
25  
26  
27  
28  
29  
30  
31  
32  
33  
34  
35  
36  
37  
38  
39  
40  
41  
42  
43  
44  
45  
46  
47  
48  
49  
50  
51  
52  
53  
54  
55  
56  
57  
58  
59  
60

For peer review only

1  
2  
3  
4 1  
5 2 Table 3. Association of ART core classes with incident anaemia (haemoglobin<10 g/dL),  
6 3 severe anaemia (haemoglobin<7.5 g/dL) or chronic anaemia (>6 months of anaemia)

| ART Regimen           | Hazard Ratio of incident anaemia (n=12,626) |                       | Hazard Ratio of incident severe anaemia (n=15,357) |                       | Hazard Ratio of incident chronic anaemia (n=12,626) |                       |
|-----------------------|---------------------------------------------|-----------------------|----------------------------------------------------|-----------------------|-----------------------------------------------------|-----------------------|
|                       | Unadjusted                                  | Adjusted <sup>a</sup> | Unadjusted                                         | Adjusted <sup>a</sup> | Unadjusted                                          | Adjusted <sup>a</sup> |
| NNRTI (REF)           | 1.00                                        | 1.00                  | 1.00                                               | 1.00                  | 1.00                                                | 1.00                  |
| PI                    | 1.26 (1.05-1.52)                            | 1.09 (0.90, 1.32)     | 1.37 (1.02-1.83)                                   | 1.09 (0.81, 1.47)     | 1.43 (0.61-3.35)                                    | 1.27 (0.54-3.04)      |
| INSTI                 | 1.39 (1.11-1.75)                            | 1.26 (1.00, 1.58)     | 1.96 (1.40-2.75)                                   | 1.51 (1.07, 2.11)     | 2.05 (0.85-4.94)                                    | 1.90 (0.76-4.64)      |
| Multiple core classes | 2.02 (1.65-3.48)                            | 1.39 (1.13, 1.70)     | 2.70 (1.99-3.67)                                   | 1.30 (0.95, 1.78)     | 3.46 (1.51-7.93)                                    | 2.21 (0.94-5.18)      |

4 <sup>a</sup>Adjusted for age, sex, race/ethnicity, CNICS site, Hepatitis C virus status, CD4 count,  
5 viral load, kidney function (eGFR), baseline haemoglobin

6 Abbreviations: ART: antiretroviral therapy, NNRTI: non-nucleoside reverse transcriptase  
7 inhibitor, PI: protease inhibitor, INSTI: integrase strand transfer inhibitor



1 Table 4. Association of ART core classes with change in  
 2 haemoglobin level during follow-up in adjusted analyses (linear  
 3 mixed-effect model); N=16,505

| ART class             | Coefficient <sup>a</sup> | 95% CI       | P-value |
|-----------------------|--------------------------|--------------|---------|
| NNRTI (REF)           |                          |              |         |
| PI                    | -0.01                    | -0.04, 0.03  | 0.675   |
| INSTI                 | -0.06                    | -0.10, -0.03 | <0.001  |
| Multiple core classes | -0.14                    | -0.18, -0.11 | <0.001  |

4 <sup>a</sup>Coefficient is the mean difference per year in Hb (g/dL) for  
 5 each core regimen relative to the NNRTI core regimen, after  
 6 adjustment for site, age, sex, race/ethnicity, hepatitis C virus  
 7 coinfection, CD4 cell count, viral load, eGFR and years in  
 8 study.

9 Abbreviations: ART: antiretroviral therapy, NNRTI: non-  
 10 nucleoside reverse-transcriptase inhibitor, PI: protease  
 11 inhibitor, INSTI: integrase strand transfer inhibitor

1  
2  
3  
4  
5  
6  
7  
8  
9  
10  
11  
12  
13  
14  
15  
16  
17  
18  
19  
20  
21  
22  
23  
24  
25  
26  
27  
28  
29  
30  
31  
32  
33  
34  
35  
36  
37  
38  
39  
40  
41  
42  
43  
44  
45  
46  
47  
48  
49  
50  
51  
52  
53  
54  
55  
56  
57  
58  
59  
60

1  
2

For peer review only

## References :

1. Redig, A.J. and N. Berliner, *Pathogenesis and clinical implications of HIV-related anemia in 2013*. Hematology Am Soc Hematol Educ Program, 2013. **2013**: p. 377-81.
2. Semba, R.D., et al., *Prevalence and cumulative incidence of and risk factors for anemia in a multicenter cohort study of human immunodeficiency virus-infected and -uninfected women*. Clin Infect Dis, 2002. **34**(2): p. 260-6.
3. Belperio, P.S. and D.C. Rhew, *Prevalence and outcomes of anemia in individuals with human immunodeficiency virus: a systematic review of the literature*. Am J Med, 2004. **116 Suppl 7A**: p. 27S-43S.
4. Sullivan, P.S., et al., *Epidemiology of anemia in human immunodeficiency virus (HIV)-infected persons: results from the multistate adult and adolescent spectrum of HIV disease surveillance project*. Blood, 1998. **91**(1): p. 301-8.
5. Mocroft, A., et al., *Anaemia is an independent predictive marker for clinical prognosis in HIV-infected patients from across Europe. EuroSIDA study group*. AIDS, 1999. **13**(8): p. 943-50.
6. Moore, R.D., J.C. Keruly, and R.E. Chaisson, *Anemia and survival in HIV infection*. J Acquir Immune Defic Syndr Hum Retrovirol, 1998. **19**(1): p. 29-33.
7. Graham, N.M., et al., *CD4+ lymphocyte response to zidovudine as a predictor of AIDS-free time and survival time*. J Acquir Immune Defic Syndr, 1993. **6**(11): p. 1258-66.
8. Mocroft, A., et al., *Haemoglobin and anaemia in the SMART study*. Antivir Ther, 2011. **16**(3): p. 329-37.
9. Harris, R.J., et al., *Prognostic importance of anaemia in HIV type-1-infected patients starting antiretroviral therapy: collaborative analysis of prospective cohort studies*. Antivir Ther, 2008. **13**(8): p. 959-67.
10. McArthur, J.C., et al., *Dementia in AIDS patients: incidence and risk factors. Multicenter AIDS Cohort Study*. Neurology, 1993. **43**(11): p. 2245-52.
11. Anude, C.J., et al., *Immuno-virologic outcomes and immuno-virologic discordance among adults alive and on anti-retroviral therapy at 12 months in Nigeria*. BMC Infect Dis, 2013. **13**: p. 113.
12. Kowalska, J.D., et al., *Current hemoglobin levels are more predictive of disease progression than hemoglobin measured at baseline in patients receiving antiretroviral treatment for HIV type 1 infection*. AIDS Res Hum Retroviruses, 2007. **23**(10): p. 1183-8.
13. Lundgren, J.D., et al., *A clinically prognostic scoring system for patients receiving highly active antiretroviral therapy: results from the EuroSIDA study*. J Infect Dis, 2002. **185**(2): p. 178-87.
14. Zauli, G., et al., *tat protein stimulates production of transforming growth factor-beta 1 by marrow macrophages: a potential mechanism for human immunodeficiency virus-1-induced hematopoietic suppression*. Blood, 1992. **80**(12): p. 3036-43.
15. Moore, R.D. and D. Forney, *Anemia in HIV-infected patients receiving highly active antiretroviral therapy*. J Acquir Immune Defic Syndr, 2002. **29**(1): p. 54-7.
16. Kerkhoff, A.D., et al., *Resolution of anaemia in a cohort of HIV-infected patients with a high prevalence and incidence of tuberculosis receiving antiretroviral therapy in South Africa*. BMC Infect Dis, 2014. **14**: p. 3860.
17. Volberding, P.A., et al., *Anemia in HIV infection: clinical impact and evidence-based management strategies*. Clin Infect Dis, 2004. **38**(10): p. 1454-63.

- 1  
2  
3 1 18. Harrison, S.A., *Management of anemia in patients receiving protease inhibitors*.  
4 2 Gastroenterol Hepatol (N Y), 2012. **8**(4): p. 254-6.  
5 3 19. Mullick C MD, Belew Y, *Clinical Review Dolutegravir NDA 204790 SN 00. 2012*.  
6 4 20. Kitahata, M.M., et al., *Cohort profile: the Centers for AIDS Research Network of*  
7 5 *Integrated Clinical Systems*. Int J Epidemiol, 2008. **37**(5): p. 948-55.  
8 6 21. *Division of AIDS. Table for Grading the Severity of Adult and Pediatric Adverse Events*.  
9 7 <http://rcc.tech-res.com/safetyandpharmacovigilance/>. Accessed 3/1/2014.  
10 8 22. Levey, A.S., et al., *A new equation to estimate glomerular filtration rate*. Ann Intern  
11 9 Med, 2009. **150**(9): p. 604-12.  
12 10 23. Fredericksen, R., et al., *Integrating a web-based, patient-administered assessment into*  
13 11 *primary care for HIV-infected adults*. J AIDS HIV Res, 2012. **4**(2): p. 47-55.  
14 12 24. Laird, N.M. and J.H. Ware, *Random-effects models for longitudinal data*. Biometrics,  
15 13 1982. **38**(4): p. 963-74.  
16 14 25. Miettinen, O.S., *The need for randomization in the study of intended effects*. Stat Med,  
17 15 1983. **2**(2): p. 267-71.  
18 16 26. Crane, H.M., et al., *A Comparison of Adherence Timeframes Using Missed Dose Items*  
19 17 *and Their Associations with Viral Load in Routine Clinical Care: Is Longer Better?*  
20 18 AIDS Behav, 2017. **21**(2): p. 470-480.  
21 19 27. Wolde HM, L.W., YMelaku YA, Girmay KH. , *Incidence and Risk Factors of Anemia*  
22 20 *among HIV/AIDS Patients Taking Anti-Retroviral Therapy at Tertiary Hospitals in Addis*  
23 21 *Ababa, Ethiopia: A Retrospective Cohort Study*. Journal of HIV/AIDS and Infectious  
24 22 Diseases, 2013.  
25 23 28. Levine, A.M., et al., *Prevalence and correlates of anemia in a large cohort of HIV-*  
26 24 *infected women: Women's Interagency HIV Study*. J Acquir Immune Defic Syndr, 2001.  
27 25 **26**(1): p. 28-35.  
28 26 29. Zhou, J., et al., *Short-term risk of anaemia following initiation of combination*  
29 27 *antiretroviral treatment in HIV-infected patients in countries in sub-Saharan Africa,*  
30 28 *Asia-Pacific, and central and South America*. J Int AIDS Soc, 2012. **15**(1): p. 5.  
31 29 30. *Panel on Antiretroviral Guidelines for Adults and Adolescents. Guidelines for the Use of*  
32 30 *Antiretroviral Agents in Adults and Adolescents Living with HIV*. Department of Health  
33 31 *and Human Services. Available at [http://www.aidsinfo.nih.gov/ContentFiles/](http://www.aidsinfo.nih.gov/ContentFiles/AdultandAdolescentGL.pdf)*  
34 32 *AdultandAdolescentGL.pdf*. Accessed [October, 2018].  
35 33 31. Nance, R.M., et al., *HIV Viral Suppression Trends Over Time Among HIV-Infected*  
36 34 *Patients Receiving Care in the United States, 1997 to 2015: A Cohort Study*. Ann Intern  
37 35 Med, 2018. **169**(6): p. 376-384.  
38 36  
39  
40  
41  
42  
43  
44  
45  
46  
47  
48  
49  
50  
51  
52  
53  
54  
55  
56  
57  
58  
59  
60

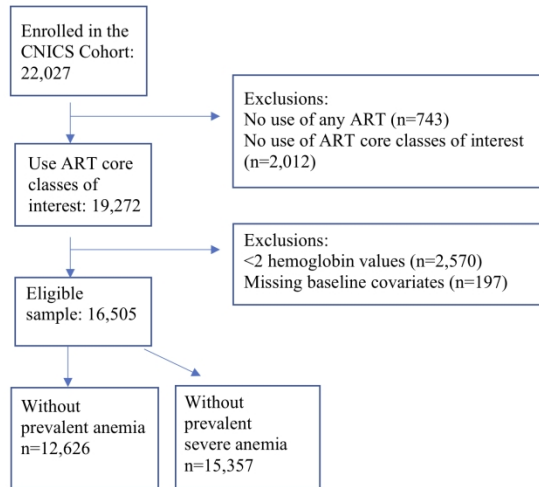

Figure 1: Flow chart for inclusion/exclusion criteria for 22,027 PLWH in care at CNICS after 1/2010. Exclusions were made for those not exposed to any of the ART core classes, those with fewer than 2 haemoglobin levels, and those missing baseline covariates, resulting in 16,505 PLWH who were included in these analyses.

215x279mm (300 x 300 DPI)

1  
2  
3  
4  
5  
6  
7  
8  
9  
10  
11  
12  
13  
14  
15  
16  
17  
18  
19  
20  
21  
22  
23  
24  
25  
26  
27  
28  
29  
30  
31  
32  
33  
34  
35  
36  
37  
38  
39  
40  
41  
42  
43  
44  
45  
46  
47  
48  
49  
50  
51  
52  
53  
54  
55  
56  
57  
58  
59  
60

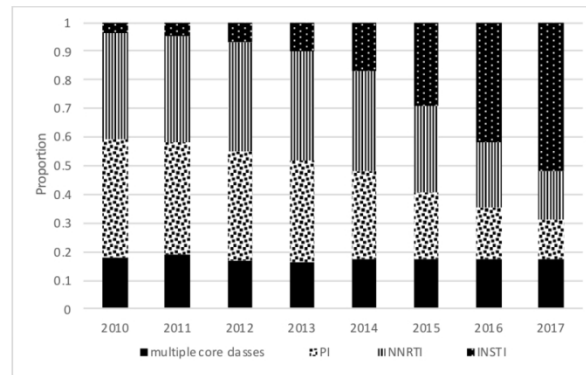

Figure 2. Proportion of study population (N=16,505) using various ART classes during complete years of study follow-up. This figure shows the trends in use of the ART core classes during 2010-2017.

215x279mm (300 x 300 DPI)

Supplemental Table 1: Backbone component drugs at baseline for participants in analytic sample (N=15,505)

| Backbone Regimen | Drug 1                   | Drug 2             | Percentage |
|------------------|--------------------------|--------------------|------------|
| 1                | Emtricitabine/Lamivudine | Tenofovir          | 69         |
| 2                | Emtricitabine/Lamivudine | Abacavir           | 10         |
| 3                | Emtricitabine/Lamivudine | Tenofovir/Abacavir | 4          |
| 4                | Emtricitabine/Lamivudine | Zidovudine         | 4          |
| 5                | Other <sup>a</sup>       |                    | 13         |

<sup>a</sup> Other backbone combinations include complex backbone combinations, NRTI-sparing regimens and salvage therapies.

Supplemental Table 2: Association of ART classes with incident anaemia among those ART naïve at baseline

| ART class   | Hazard ratio of incident anaemia (n=6,426) |                       |
|-------------|--------------------------------------------|-----------------------|
|             | Unadjusted                                 | Adjusted <sup>a</sup> |
| NNRTI (REF) | 1.00                                       | 1.00                  |
| PI          | 0.92 (0.67-1.247)                          | 0.69 (0.45-1.06)      |
| INSTI       | 1.73 (1.39-2.15)                           | 1.10 (0.84, 1.44)     |

<sup>a</sup>Adjusted for age, sex, race/ethnicity, CNICS site, Hepatitis C virus status, CD4 count, viral load, kidney function (eGFR) and baseline haemoglobin

Abbreviations: ART: antiretroviral therapy, NNRTI: non-nucleoside reverse-transcriptase inhibitor, PI: protease inhibitor, INSTI: integrase strand transfer inhibitor



Supplemental Table 3. Association of ART classes with change in haemoglobin level during follow-up in adjusted analyses among those ART naïve at baseline (linear mixed-effect model); N=7,264

| ART class   | Coefficient <sup>a</sup> | 95% CI       | P-value |
|-------------|--------------------------|--------------|---------|
| NNRTI (REF) |                          |              |         |
| PI          | -0.08                    | -0.16, -0.01 | 0.031   |
| INSTI       | -0.15                    | -0.22, -0.09 | <0.001  |

<sup>a</sup>Coefficient is the mean difference per year in Hb (g/dL) for each core regimen relative to the NNRTI core regimen, after adjustment for site, age, sex, race/ethnicity, hepatitis C virus coinfection, CD4 cell count, viral load, eGFR and years in study. Abbreviations: ART: antiretroviral therapy, NNRTI: non-nucleoside reverse-transcriptase inhibitor, PI: protease inhibitor, INSTI: integrase strand transfer inhibitor

1 Supplemental Table 4. Association of ART core classes with incident anaemia (haemoglobin<10  
2 g/dL) and severe anaemia (haemoglobin<7.5 g/dL) including time-updated adjustment for for  
3 regimens including abacavir/3TC.

| ART Regimen                    | Unadjusted       | Minimally adjusted <sup>a</sup> | With time-updated abacavir adjustment <sup>b</sup> |
|--------------------------------|------------------|---------------------------------|----------------------------------------------------|
| <b>Incident anaemia</b>        |                  |                                 |                                                    |
| NNRTI (REF)                    | 1.00             | 1.00                            | 1.00                                               |
| PI                             | 1.26 (1.05-1.52) | 1.09 (0.90, 1.32)               | 1.07 (0.88-1.30)                                   |
| INSTI                          | 1.39 (1.11-1.75) | 1.26 (1.00, 1.58)               | 1.23 (0.97, 1.56)                                  |
| Multiple core classes          | 2.02 (1.65-3.48) | 1.39 (1.13, 1.70)               | 1.36 (1.09, 1.68)                                  |
| <b>Incident severe anaemia</b> |                  |                                 |                                                    |
| NNRTI (REF)                    | 1.00             | 1.00                            | 1.00                                               |
| PI                             | 1.37 (1.02-1.83) | 1.09 (0.81, 1.47)               | 1.10 (0.80-1.50)                                   |
| INSTI                          | 1.96 (1.40-2.75) | 1.51 (1.07, 2.11)               | 1.52 (1.07, 2.15)                                  |
| Multiple core classes          | 2.70 (1.99-3.67) | 1.30 (0.95, 1.78)               | 1.31 (0.95 1.81)                                   |

4 <sup>a</sup>Minimally adjusted model includes adjustment for: age, sex, race, site, hepatitis C co-infection,  
5 CD4 category, VL, eGFR category and haemoglobin at baseline.

6 <sup>b</sup>Model includes adjustment variables in minimally adjusted model plus a term for time-updated  
7 abacavir/3TC backbone regimen use. The other backbone regimens largely consisted of tenofovir  
8 /3TC or other complex backbone combinations, NRTI-sparing regimens and salvage therapies.

1  
2  
3 1  
4  
5  
6  
7  
8  
9  
10  
11  
12  
13  
14  
15  
16  
17  
18  
19  
20  
21  
22  
23  
24  
25  
26  
27  
28  
29  
30  
31  
32  
33  
34  
35  
36  
37  
38  
39  
40  
41  
42  
43  
44  
45  
46  
47  
48  
49  
50  
51  
52  
53  
54  
55  
56  
57  
58  
59  
60

For peer review only

Supplemental Table 5. Association of ART core classes with incident anaemia (haemoglobin<10 g/dL) and severe anaemia (haemoglobin<7.5 g/dL) excluding people with AZT use

| ART Regimen           | Hazard Ratio of incident anaemia (n=11,187) |                       | Hazard Ratio of incident severe anaemia (n=13,513) |                       |
|-----------------------|---------------------------------------------|-----------------------|----------------------------------------------------|-----------------------|
|                       | Unadjusted                                  | Adjusted <sup>a</sup> | Unadjusted                                         | Adjusted <sup>a</sup> |
| NNRTI (REF)           | 1.00                                        | 1.00                  | 1.00                                               | 1.00                  |
| PI                    | 1.30 (1.05,1.60)                            | 1.11 (0.90,1.38)      | 1.34 (0.97, 1.86)                                  | 1.05 (0.75, 1.47)     |
| INSTI                 | 1.54 (1.20, 1.97)                           | 1.37 (1.07,1.77)      | 1.90 (1.31, 2.76)                                  | 1.45 (1.00, 2.11)     |
| Multiple core classes | 2.23 (1.76, 2.82)                           | 1.55 (1.22,1.97)      | 2.90 (2.06, 4.08)                                  | 1.34 (0.94, 1.90)     |

<sup>a</sup>Adjusted for age, sex, race/ethnicity, CNICS site, Hepatitis C virus status, CD4 count, viral load, kidney function (eGFR), baseline haemoglobin  
 Abbreviations: ART: antiretroviral therapy, AZT: zidovudine, NNRTI: non-nucleoside reverse transcriptase inhibitor, PI: protease inhibitor, INSTI: integrase strand transfer inhibitor

Supplemental Table 6. Association of ART core classes with change in haemoglobin level during follow-up in adjusted analyses (linear mixed-effect model) excluding people with AZT use; N=14,486

| ART class             | Coefficient <sup>a</sup> | 95% CI       |
|-----------------------|--------------------------|--------------|
| NNRTI (REF)           |                          |              |
| PI                    | 0.00                     | -0.04, 0.04  |
| INSTI                 | -0.05                    | -0.09, -0.01 |
| Multiple core classes | -0.13                    | -0.17, -0.09 |

<sup>a</sup>Coefficient is the mean difference per year in Hb (g/dL) for each core regimen relative to the NNRTI core regimen, after adjustment for site, age, sex, race/ethnicity, hepatitis C virus coinfection, CD4 cell count, viral load, eGFR and years in study.

Abbreviations: ART: antiretroviral therapy, AZT: zidovudine, NNRTI: non-nucleoside reverse-transcriptase inhibitor, PI: protease inhibitor, INSTI: integrase strand transfer inhibitor

STROBE Statement—Checklist of items that should be included in reports of *cohort studies*

|                                                         | Item No | Recommendation                                                                                                                                                                                                                                                                                                         |
|---------------------------------------------------------|---------|------------------------------------------------------------------------------------------------------------------------------------------------------------------------------------------------------------------------------------------------------------------------------------------------------------------------|
| ✓ Title and abstract<br>(page 1-title, page 3 abstract) | 1       | (a) Indicate the study's design with a commonly used term in the title or the abstract<br>(b) Provide in the abstract an informative and balanced summary of what was done and what was found                                                                                                                          |
| <b>Introduction</b>                                     |         |                                                                                                                                                                                                                                                                                                                        |
| ✓ Background/rationale<br>(pages 5, 6)                  | 2       | Explain the scientific background and rationale for the investigation being reported                                                                                                                                                                                                                                   |
| ✓ Objectives<br>(page 6)                                | 3       | State specific objectives, including any prespecified hypotheses                                                                                                                                                                                                                                                       |
| <b>Methods</b>                                          |         |                                                                                                                                                                                                                                                                                                                        |
| ✓ Study design<br>(page 6)                              | 4       | Present key elements of study design early in the paper                                                                                                                                                                                                                                                                |
| ✓ Setting<br>(page 6)                                   | 5       | Describe the setting, locations, and relevant dates, including periods of recruitment, exposure, follow-up, and data collection                                                                                                                                                                                        |
| ✓ Participants<br>(page 6)                              | 6       | (a) Give the eligibility criteria, and the sources and methods of selection of participants. Describe methods of follow-up<br>(b) For matched studies, give matching criteria and number of exposed and unexposed                                                                                                      |
| ✓ Variables<br>(pages 7, 8)                             | 7       | Clearly define all outcomes, exposures, predictors, potential confounders, and effect modifiers. Give diagnostic criteria, if applicable                                                                                                                                                                               |
| ✓ Data sources/<br>measurement<br>(pages 7, 8)          | 8*      | For each variable of interest, give sources of data and details of methods of assessment (measurement). Describe comparability of assessment methods if there is more than one group                                                                                                                                   |
| ✓ Bias<br>(page 9)                                      | 9       | Describe any efforts to address potential sources of bias                                                                                                                                                                                                                                                              |
| ✓ Study size<br>(page 6)                                | 10      | Explain how the study size was arrived at                                                                                                                                                                                                                                                                              |
| ✓ Quantitative variables<br>(pages 7, 8)                | 11      | Explain how quantitative variables were handled in the analyses. If applicable, describe which groupings were chosen and why                                                                                                                                                                                           |
| ✓ Statistical methods<br>(pages 8, 9)                   | 12      | (a) Describe all statistical methods, including those used to control for confounding<br>(b) Describe any methods used to examine subgroups and interactions<br>(c) Explain how missing data were addressed<br>(d) If applicable, explain how loss to follow-up was addressed<br>(e) Describe any sensitivity analyses |
| <b>Results</b>                                          |         |                                                                                                                                                                                                                                                                                                                        |
| ✓ Participants<br>(figure 1, page 9)                    | 13*     | (a) Report numbers of individuals at each stage of study—eg numbers potentially eligible, examined for eligibility, confirmed eligible, included in the study, completing follow-up, and analysed<br>(b) Give reasons for non-participation at each stage<br>(c) Consider use of a flow diagram                        |
| ✓ Descriptive data<br>(pages 9, 10)                     | 14*     | (a) Give characteristics of study participants (eg demographic, clinical, social) and information on exposures and potential confounders<br>(b) Indicate number of participants with missing data for each variable of interest<br>(c) Summarise follow-up time (eg, average and total amount)                         |

|                                  |                                     |     |                                                                                                                                                                                                                                                                                                                                                                                                                           |
|----------------------------------|-------------------------------------|-----|---------------------------------------------------------------------------------------------------------------------------------------------------------------------------------------------------------------------------------------------------------------------------------------------------------------------------------------------------------------------------------------------------------------------------|
| 1<br>2<br>3                      | ✓Outcome data<br>(page 10)          | 15* | Report numbers of outcome events or summary measures over time                                                                                                                                                                                                                                                                                                                                                            |
| 4<br>5<br>6<br>7<br>8<br>9<br>10 | ✓Main results<br>(pages 10, 11)     | 16  | (a) Give unadjusted estimates and, if applicable, confounder-adjusted estimates and their precision (eg, 95% confidence interval). Make clear which confounders were adjusted for and why they were included<br><hr/> (b) Report category boundaries when continuous variables were categorized<br><hr/> (c) If relevant, consider translating estimates of relative risk into absolute risk for a meaningful time period |
| 11<br>12<br>13                   | ✓Other analyses<br>(page 11)        | 17  | Report other analyses done—eg analyses of subgroups and interactions, and sensitivity analyses                                                                                                                                                                                                                                                                                                                            |
| 14                               | <b>Discussion</b>                   |     |                                                                                                                                                                                                                                                                                                                                                                                                                           |
| 15<br>16<br>17                   | ✓Key results<br>(page 11)           | 18  | Summarise key results with reference to study objectives                                                                                                                                                                                                                                                                                                                                                                  |
| 18<br>19<br>20                   | ✓Limitations<br>(page 12)           | 19  | Discuss limitations of the study, taking into account sources of potential bias or imprecision. Discuss both direction and magnitude of any potential bias                                                                                                                                                                                                                                                                |
| 21<br>22                         | ✓Interpretation<br>(page 13)        | 20  | Give a cautious overall interpretation of results considering objectives, limitations, multiplicity of analyses, results from similar studies, and other relevant evidence                                                                                                                                                                                                                                                |
| 23<br>24<br>25                   | ✓Generalisability<br>(pages 12, 13) | 21  | Discuss the generalisability (external validity) of the study results                                                                                                                                                                                                                                                                                                                                                     |
| 26                               | <b>Other information</b>            |     |                                                                                                                                                                                                                                                                                                                                                                                                                           |
| 27<br>28<br>29                   | ✓Funding<br>(page 2)                | 22  | Give the source of funding and the role of the funders for the present study and, if applicable, for the original study on which the present article is based                                                                                                                                                                                                                                                             |

\*Give information separately for exposed and unexposed groups.

**Note:** An Explanation and Elaboration article discusses each checklist item and gives methodological background and published examples of transparent reporting. The STROBE checklist is best used in conjunction with this article (freely available on the Web sites of PLoS Medicine at <http://www.plosmedicine.org/>, Annals of Internal Medicine at <http://www.annals.org/>, and Epidemiology at <http://www.epidem.com/>). Information on the STROBE Initiative is available at <http://www.strobe-statement.org>.
