# Supplementary material for: Antiretroviral drug class and anaemia risk in the current treatment era among people living with HIV in the USA: a clinical cohort study
Source: PubMed Central journal article supplement — BMJ Open. 2020 Mar 19;10(3):e031487. doi: 10.1136/bmjopen-2019-031487 (PMC7103836; doi:10.1136/bmjopen-2019-031487), 2020-03-19
Supplement: bmjopen-2019-031487supp002.pdf [file bmjopen-2019-031487supp002.pdf]

Supplemental Table 2: Association of ART classes with incident anaemia among those ART naïve at baseline

| ART class   | Hazard ratio of incident anaemia (n=6,426) |                       |
|-------------|--------------------------------------------|-----------------------|
|             | Unadjusted                                 | Adjusted <sup>a</sup> |
| NNRTI (REF) | 1.00                                       | 1.00                  |
| PI          | 0.92 (0.67-1.247)                          | 0.69 (0.45-1.06)      |
| INSTI       | 1.73 (1.39-2.15)                           | 1.10 (0.84, 1.44)     |

<sup>a</sup>Adjusted for age, sex, race/ethnicity, CNICS site, Hepatitis C virus status, CD4 count, viral load, kidney function (eGFR) and baseline haemoglobin

Abbreviations: ART: antiretroviral therapy, NNRTI: non-nucleoside reverse-transcriptase inhibitor, PI: protease inhibitor, INSTI: integrase strand transfer inhibitor
