# Supplementary material for: Antiretroviral drug class and anaemia risk in the current treatment era among people living with HIV in the USA: a clinical cohort study
Source: PubMed Central journal article supplement — BMJ Open. 2020 Mar 19;10(3):e031487. doi: 10.1136/bmjopen-2019-031487 (PMC7103836; doi:10.1136/bmjopen-2019-031487), 2020-03-19
Supplement: bmjopen-2019-031487supp003.pdf [file bmjopen-2019-031487supp003.pdf]

Supplemental Table 3. Association of ART classes with change in haemoglobin level during follow-up in adjusted analyses among those ART naïve at baseline (linear mixed-effect model); N=7,264

| ART class   | Coefficient <sup>a</sup> | 95% CI       | P-value |
|-------------|--------------------------|--------------|---------|
| NNRTI (REF) |                          |              |         |
| PI          | -0.08                    | -0.16, -0.01 | 0.031   |
| INSTI       | -0.15                    | -0.22, -0.09 | <0.001  |

<sup>a</sup>Coefficient is the mean difference per year in Hb (g/dL) for each core regimen relative to the NNRTI core regimen, after adjustment for site, age, sex, race/ethnicity, hepatitis C virus coinfection, CD4 cell count, viral load, eGFR and years in study. Abbreviations: ART: antiretroviral therapy, NNRTI: non-nucleoside reverse-transcriptase inhibitor, PI: protease inhibitor, INSTI: integrase strand transfer inhibitor
