# Supplementary material for: Antiretroviral drug class and anaemia risk in the current treatment era among people living with HIV in the USA: a clinical cohort study
Source: PubMed Central journal article supplement — BMJ Open. 2020 Mar 19;10(3):e031487. doi: 10.1136/bmjopen-2019-031487 (PMC7103836; doi:10.1136/bmjopen-2019-031487), 2020-03-19
Supplement: bmjopen-2019-031487supp004.pdf [file bmjopen-2019-031487supp004.pdf]

1 Supplemental Table 4. Association of ART core classes with incident anaemia (haemoglobin<10  
2 g/dL) and severe anaemia (haemoglobin<7.5 g/dL) including time-updated adjustment for for  
3 regimens including abacavir/3TC.

| ART Regimen                    | Unadjusted       | Minimally adjusted <sup>a</sup> | With time-updated abacavir adjustment <sup>b</sup> |
|--------------------------------|------------------|---------------------------------|----------------------------------------------------|
| <b>Incident anaemia</b>        |                  |                                 |                                                    |
| NNRTI (REF)                    | 1.00             | 1.00                            | 1.00                                               |
| PI                             | 1.26 (1.05-1.52) | 1.09 (0.90, 1.32)               | 1.07 (0.88-1.30)                                   |
| INSTI                          | 1.39 (1.11-1.75) | 1.26 (1.00, 1.58)               | 1.23 (0.97, 1.56)                                  |
| Multiple core classes          | 2.02 (1.65-3.48) | 1.39 (1.13, 1.70)               | 1.36 (1.09, 1.68)                                  |
| <b>Incident severe anaemia</b> |                  |                                 |                                                    |
| NNRTI (REF)                    | 1.00             | 1.00                            | 1.00                                               |
| PI                             | 1.37 (1.02-1.83) | 1.09 (0.81, 1.47)               | 1.10 (0.80-1.50)                                   |
| INSTI                          | 1.96 (1.40-2.75) | 1.51 (1.07, 2.11)               | 1.52 (1.07, 2.15)                                  |
| Multiple core classes          | 2.70 (1.99-3.67) | 1.30 (0.95, 1.78)               | 1.31 (0.95, 1.81)                                  |

4 <sup>a</sup>Minimally adjusted model includes adjustment for: age, sex, race, site, hepatitis C co-infection,  
5 CD4 category, VL, eGFR category and haemoglobin at baseline.

6 <sup>b</sup>Model includes adjustment variables in minimally adjusted model plus a term for time-updated  
7 abacavir/3TC backbone regimen use. The other backbone regimens largely consisted of tenofovir  
8 /3TC or other complex backbone combinations, NRTI-sparing regimens and salvage therapies.

2

1
