# Supplementary material for: Antiretroviral drug class and anaemia risk in the current treatment era among people living with HIV in the USA: a clinical cohort study
Source: PubMed Central journal article supplement — BMJ Open. 2020 Mar 19;10(3):e031487. doi: 10.1136/bmjopen-2019-031487 (PMC7103836; doi:10.1136/bmjopen-2019-031487), 2020-03-19
Supplement: bmjopen-2019-031487supp005.pdf [file bmjopen-2019-031487supp005.pdf]

Supplemental Table 5. Association of ART core classes with incident anaemia (haemoglobin<10 g/dL) and severe anaemia (haemoglobin<7.5 g/dL) excluding people with AZT use

| ART Regimen           | Hazard Ratio of incident anaemia (n=11,187) |                       | Hazard Ratio of incident severe anaemia (n=13,513) |                       |
|-----------------------|---------------------------------------------|-----------------------|----------------------------------------------------|-----------------------|
|                       | Unadjusted                                  | Adjusted <sup>a</sup> | Unadjusted                                         | Adjusted <sup>a</sup> |
| NNRTI (REF)           | 1.00                                        | 1.00                  | 1.00                                               | 1.00                  |
| PI                    | 1.30 (1.05,1.60)                            | 1.11 (0.90,1.38)      | 1.34 (0.97, 1.86)                                  | 1.05 (0.75, 1.47)     |
| INSTI                 | 1.54 (1.20, 1.97)                           | 1.37 (1.07,1.77)      | 1.90 (1.31, 2.76)                                  | 1.45 (1.00, 2.11)     |
| Multiple core classes | 2.23 (1.76, 2.82)                           | 1.55 (1.22,1.97)      | 2.90 (2.06, 4.08)                                  | 1.34 (0.94, 1.90)     |

<sup>a</sup>Adjusted for age, sex, race/ethnicity, CNICS site, Hepatitis C virus status, CD4 count, viral load, kidney function (eGFR), baseline haemoglobin

Abbreviations: ART: antiretroviral therapy, AZT: zidovudine, NNRTI: non-nucleoside reverse transcriptase inhibitor, PI: protease inhibitor, INSTI: integrase strand transfer inhibitor
