# Supplementary material for: Antiretroviral drug class and anaemia risk in the current treatment era among people living with HIV in the USA: a clinical cohort study
Source: PubMed Central journal article supplement — BMJ Open. 2020 Mar 19;10(3):e031487. doi: 10.1136/bmjopen-2019-031487 (PMC7103836; doi:10.1136/bmjopen-2019-031487), 2020-03-19
Supplement: bmjopen-2019-031487supp006.pdf [file bmjopen-2019-031487supp006.pdf]

Supplemental Table 6. Association of ART core classes with change in haemoglobin level during follow-up in adjusted analyses (linear mixed-effect model) excluding people with AZT use; N=14,486

| ART class             | Coefficient <sup>a</sup> | 95% CI       |
|-----------------------|--------------------------|--------------|
| NNRTI (REF)           |                          |              |
| PI                    | 0.00                     | -0.04, 0.04  |
| INSTI                 | -0.05                    | -0.09, -0.01 |
| Multiple core classes | -0.13                    | -0.17, -0.09 |

<sup>a</sup>Coefficient is the mean difference per year in Hb (g/dL) for each core regimen relative to the NNRTI core regimen, after adjustment for site, age, sex, race/ethnicity, hepatitis C virus coinfection, CD4 cell count, viral load, eGFR and years in study.

Abbreviations: ART: antiretroviral therapy, AZT: zidovudine, NNRTI: non-nucleoside reverse-transcriptase inhibitor, PI: protease inhibitor, INSTI: integrase strand transfer inhibitor
